# Supplementary material
Source: publisher figshare collection journal article supplement (https://frontiersin.figshare.com/ndownloader/files/24551918)
Supplement: Supplementary file [file 24551918]

## Supporting Information

### **Novel Alkyl(aryl)-Substituted 2,2-Difluoro-6-(trichloromethyl)-2*H*-1,3,2-oxazaborinin-3-ium-2-ides: Synthesis, Antimicrobial Activity, and CT-DNA Binding Evaluations**

Wilian C. Rosa,<sup>a</sup> Inaiá O. Rocha,<sup>a</sup> Melissa B. Rodrigues,<sup>a</sup> Helena S. Coelho,<sup>b,c</sup> Laura B. Denardin,<sup>b</sup> Pauline C. Ledur,<sup>b</sup> Nilo Zanatta,<sup>a</sup> Thiago V. Acunha,<sup>d</sup> Bernardo A. Iglesias<sup>d\*</sup> and Helio G. Bonacorso<sup>a\*</sup>

<sup>a</sup> Núcleo de Química de Heterociclos (NUQUIMHE), Departamento de Química, Universidade Federal de Santa Maria, 97.105-900, Santa Maria, RS, Brazil..

<sup>b</sup> Laboratório de Pesquisas Micológicas (LAPEMI), Departamento de Microbiologia e Parasitologia, Universidade Federal de Santa Maria, 97105-900, Santa Maria, RS, Brazil.

<sup>c</sup> Instituto Federal de Educação, Ciência e Tecnologia Farroupilha, Santa Maria, RS, Brazil.

<sup>d</sup> Laboratório de Bioinorgânica e Materiais Porfirínicos, Departamento de Química, Universidade Federal de Santa Maria, Santa Maria, 97105-900, RS, Brazil.

## Table of Contents

|                                                                    |     |
|--------------------------------------------------------------------|-----|
| 1. NMR spectra of compounds 4a-i, 5e, 6a-i and 7e.....             | S3  |
| 2. HMRS spectra of compounds 4c, 4d, 4e and 4g.....                | S33 |
| 3. Single Crystal X-Ray Data of compounds 4g and 6e.....           | S37 |
| 4. UV-Vis spectra.....                                             | S45 |
| 5. Steady-state emission fluorescence spectra.....                 | S47 |
| 6. UV-Vis DNA titrations spectra.....                              | S48 |
| 7. Competitive EB-DNA assays by emission fluorescence spectra..... | S53 |
| 8. TD-DFT Calculations for compounds 6a-i, 7e.....                 | S58 |
| 9. Antimicrobial assays.....                                       | S89 |
| 10. Cytotoxicity assays.....                                       | S91 |

1.  $^1\text{H}$ -,  $^{13}\text{C}$ -,  $^{11}\text{B}$ -,  $^{19}\text{F}$ -NMR spectra of compounds 4a-i, 5e, 6a-i and 7e.

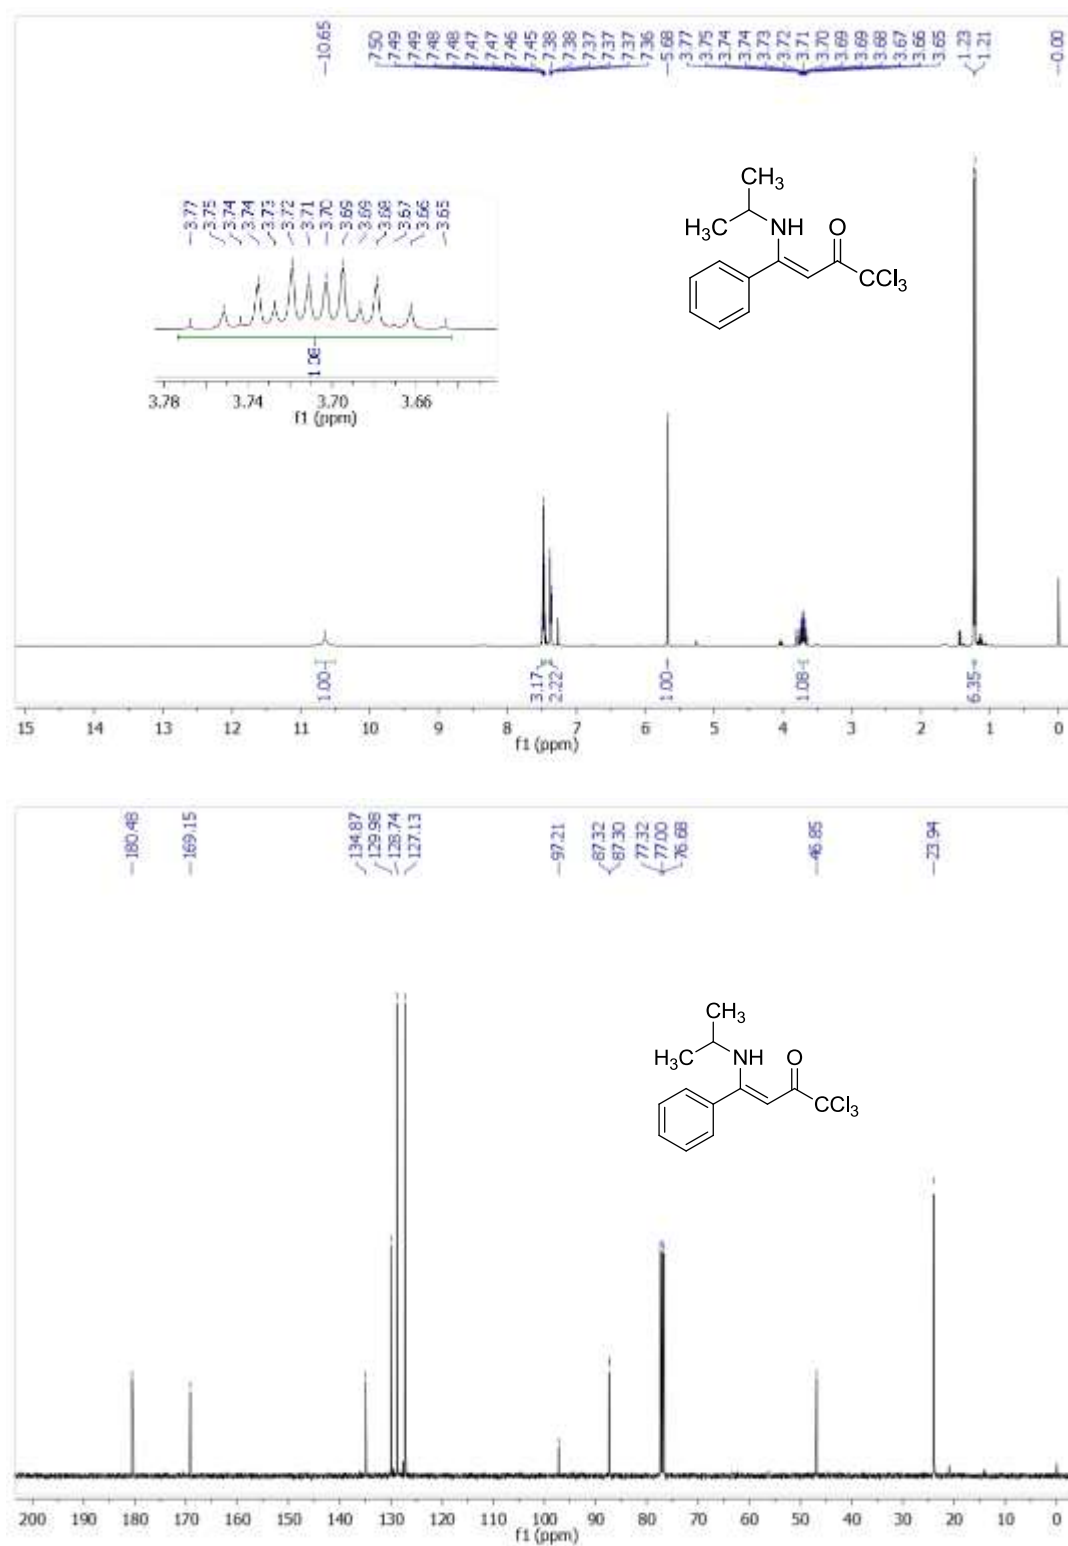

**Figure S1.**  $^1\text{H}$ - and  $^{13}\text{C}$ -NMR in  $\text{CDCl}_3$  at 400 and 101 MHz, respectively of compound 4a.

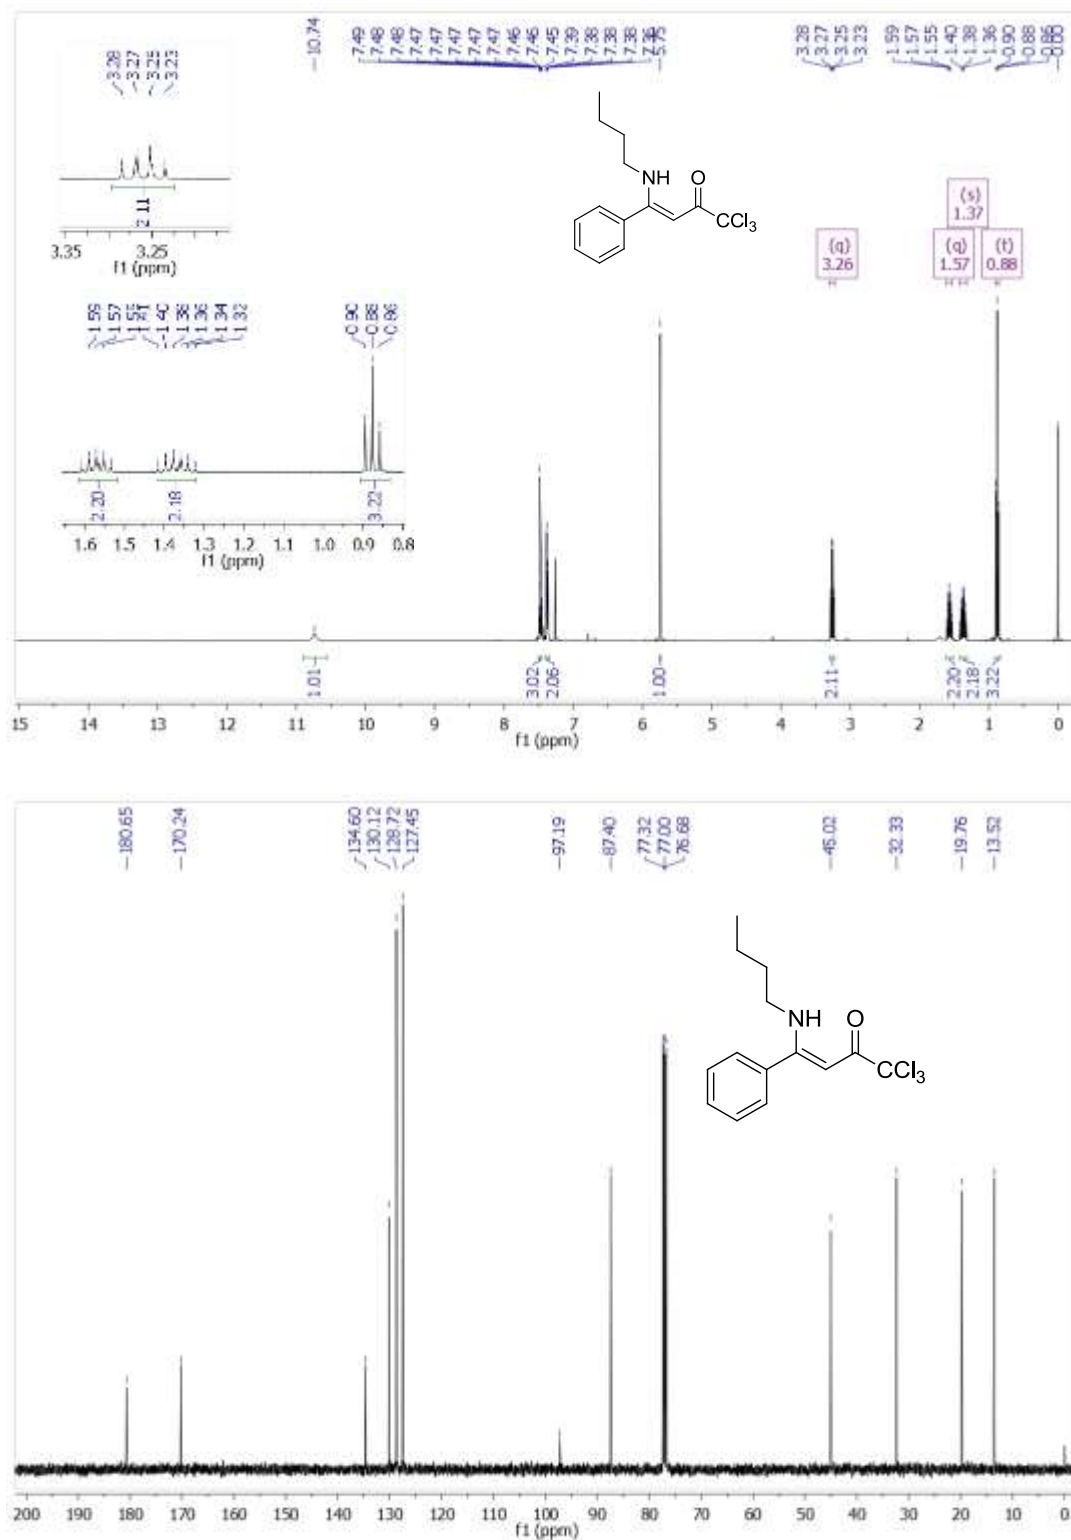

**Figure S2.** <sup>1</sup>H- and <sup>13</sup>C-NMR in CDCl<sub>3</sub> at 400 and 101 MHz, respectively of compound **4b**.

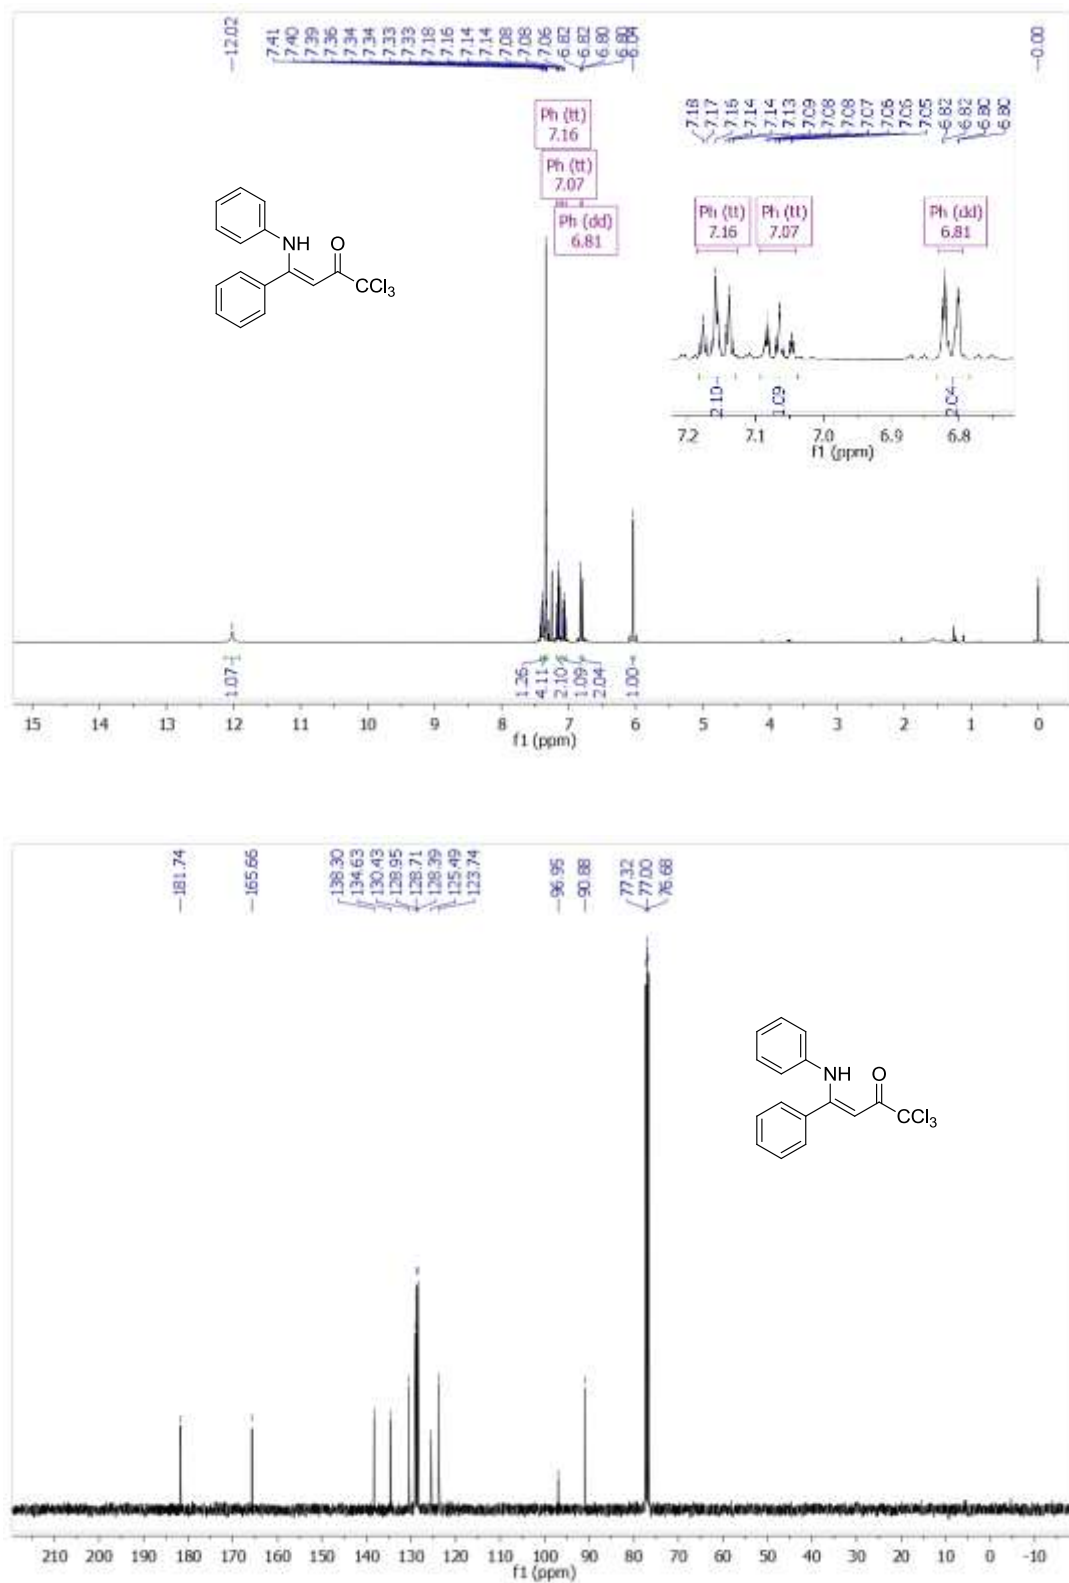

**Figure S3.** <sup>1</sup>H- and <sup>13</sup>C-NMR in CDCl<sub>3</sub> at 400 and 101 MHz respectively of compound **4c**.

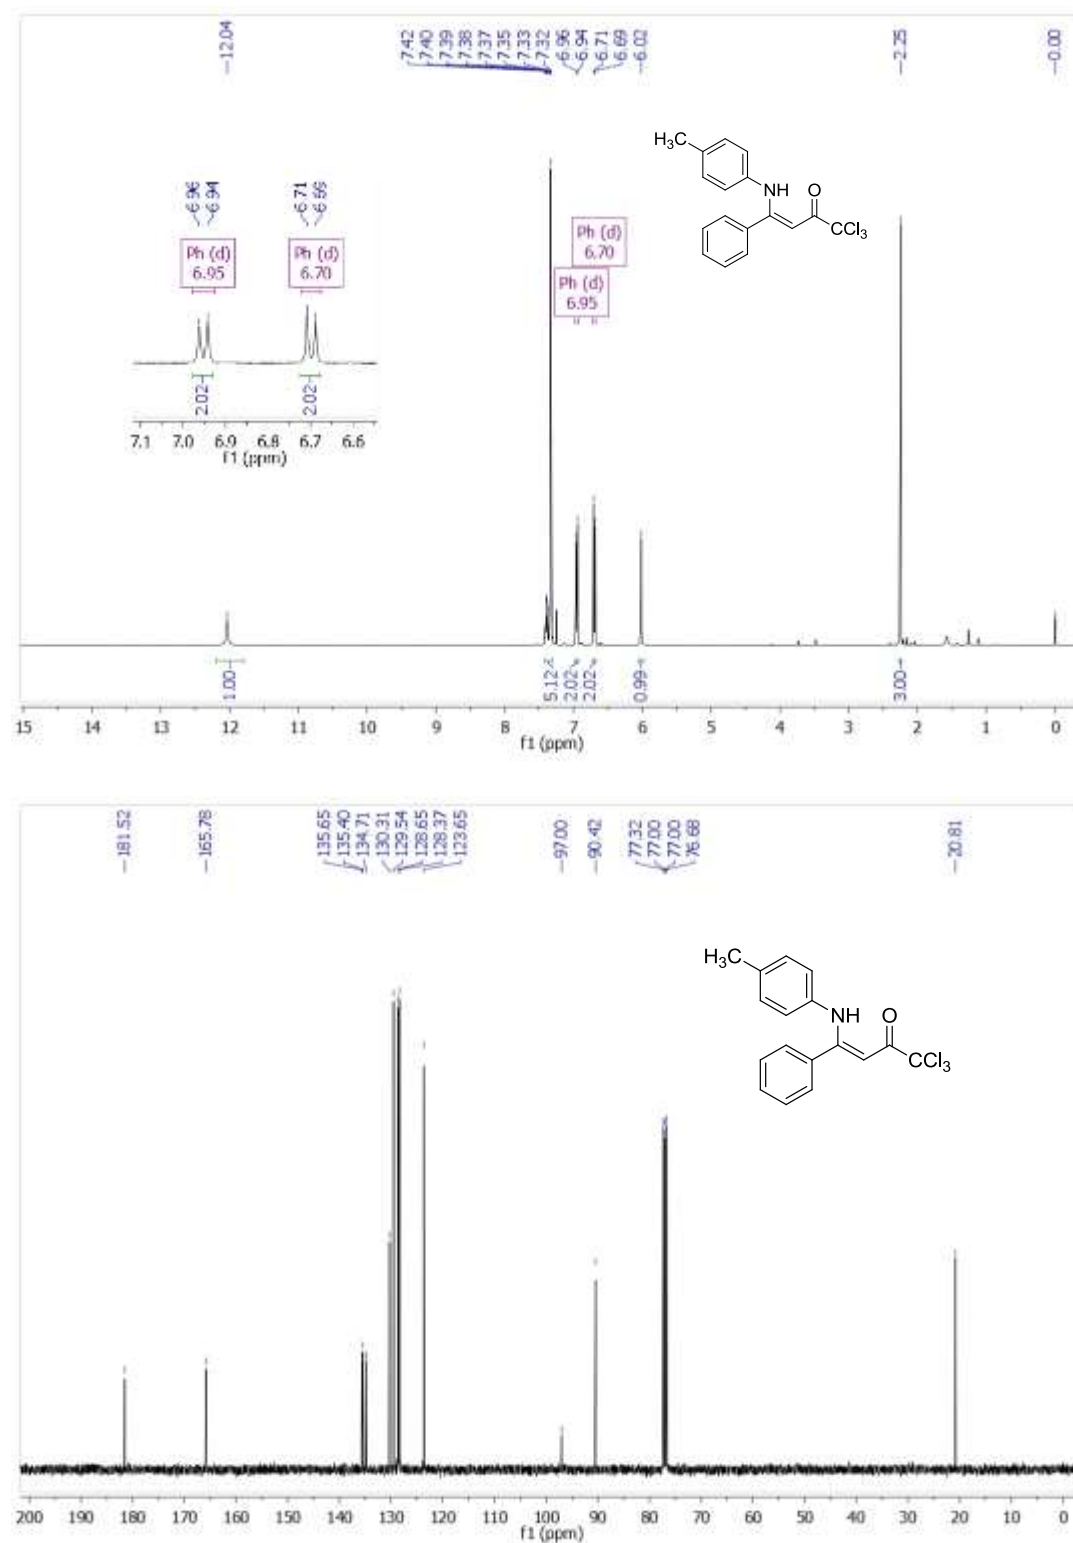

**Figure S4.** <sup>1</sup>H- and <sup>13</sup>C-NMR in CDCl<sub>3</sub> at 400 and 101 MHz, respectively of compound **4d**.

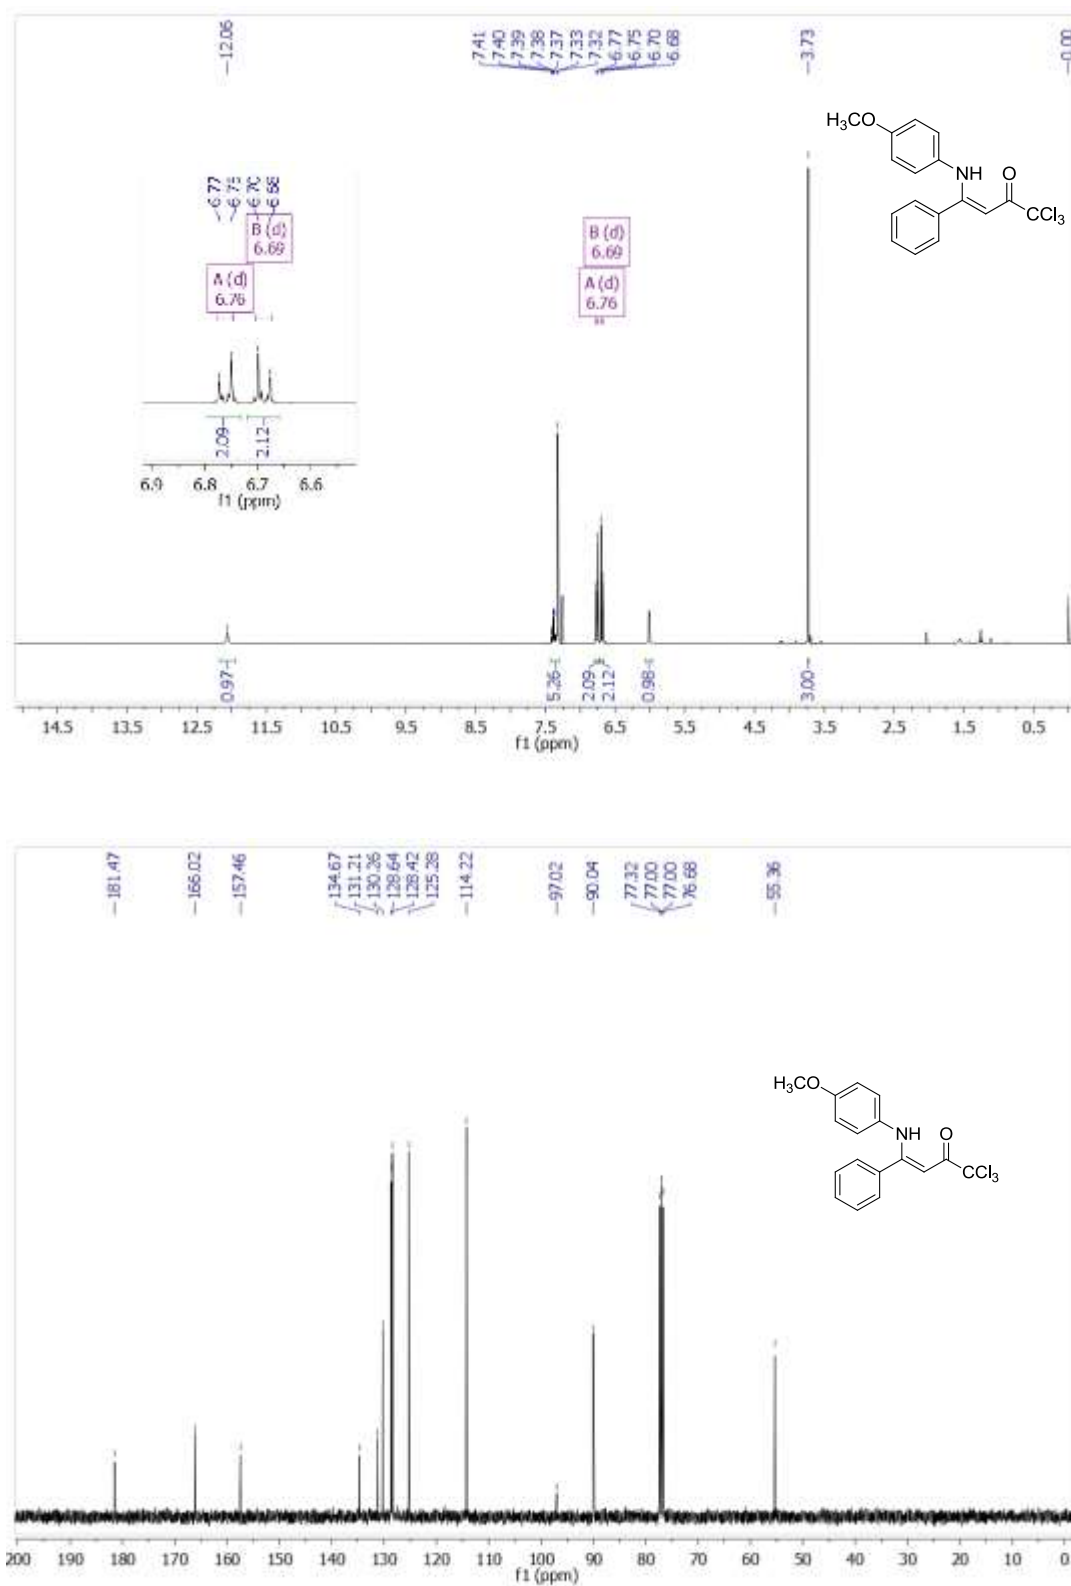

**Figure S5.** <sup>1</sup>H- and <sup>13</sup>C-NMR in CDCl<sub>3</sub> at 400 and 101 MHz, respectively of compound **4e**.

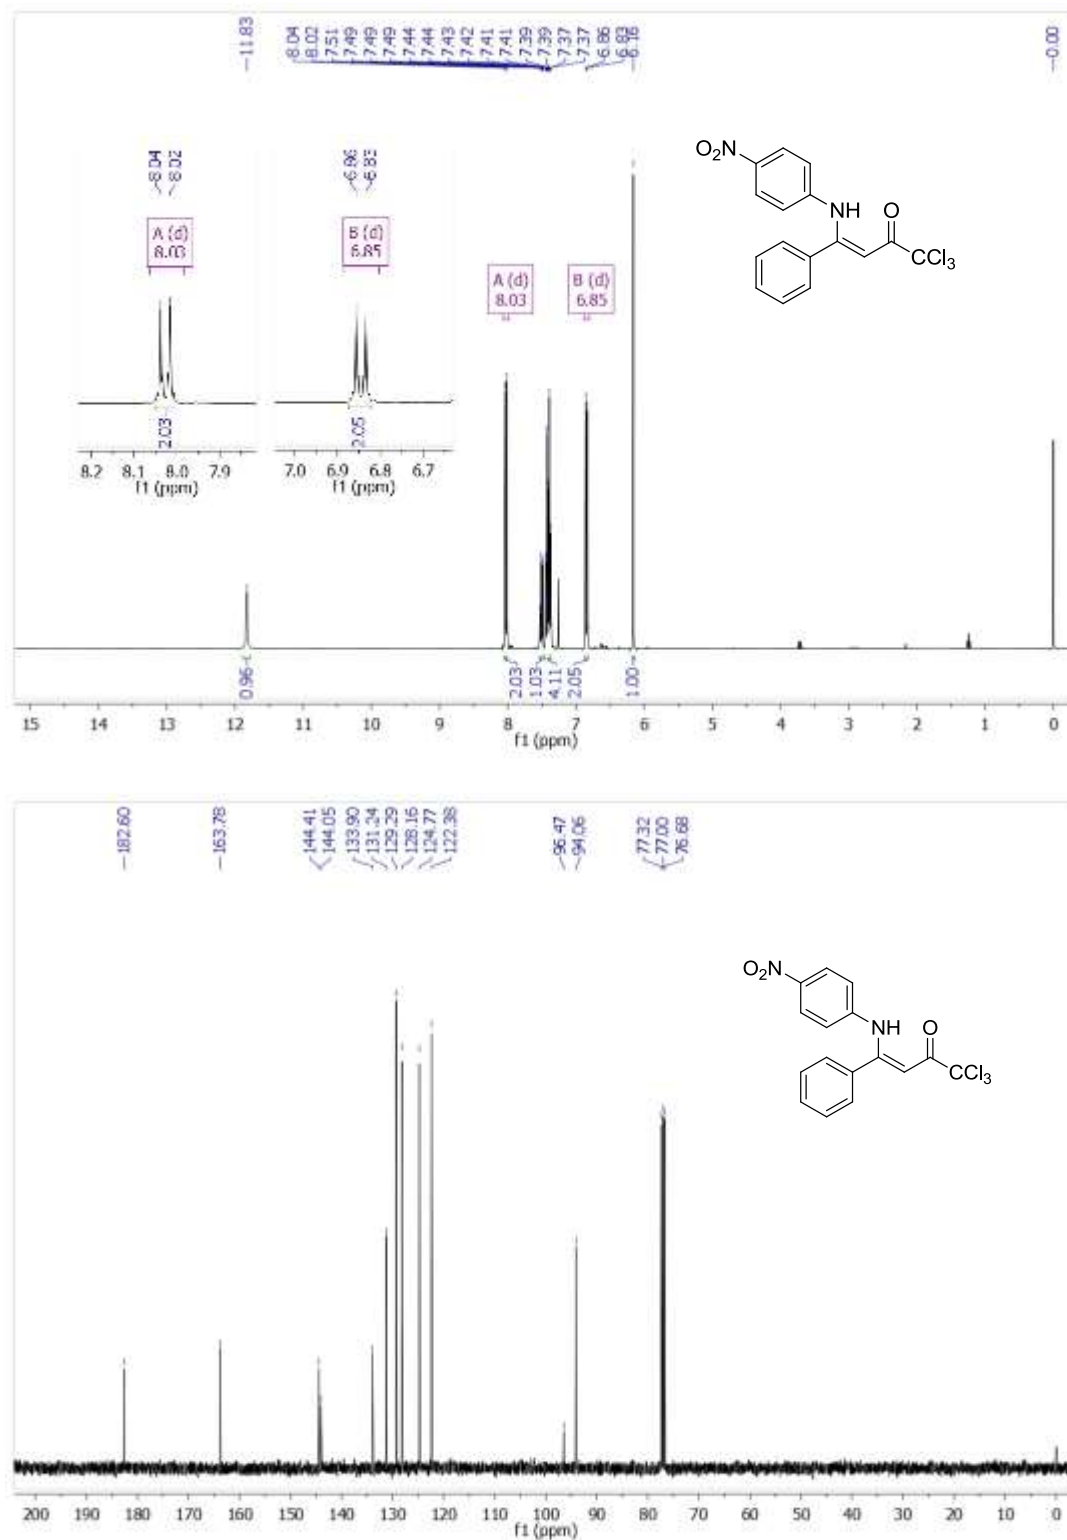

**Figure S6.** <sup>1</sup>H- and <sup>13</sup>C-NMR in CDCl<sub>3</sub> at 400 and 101 MHz, respectively of compound **4f**.



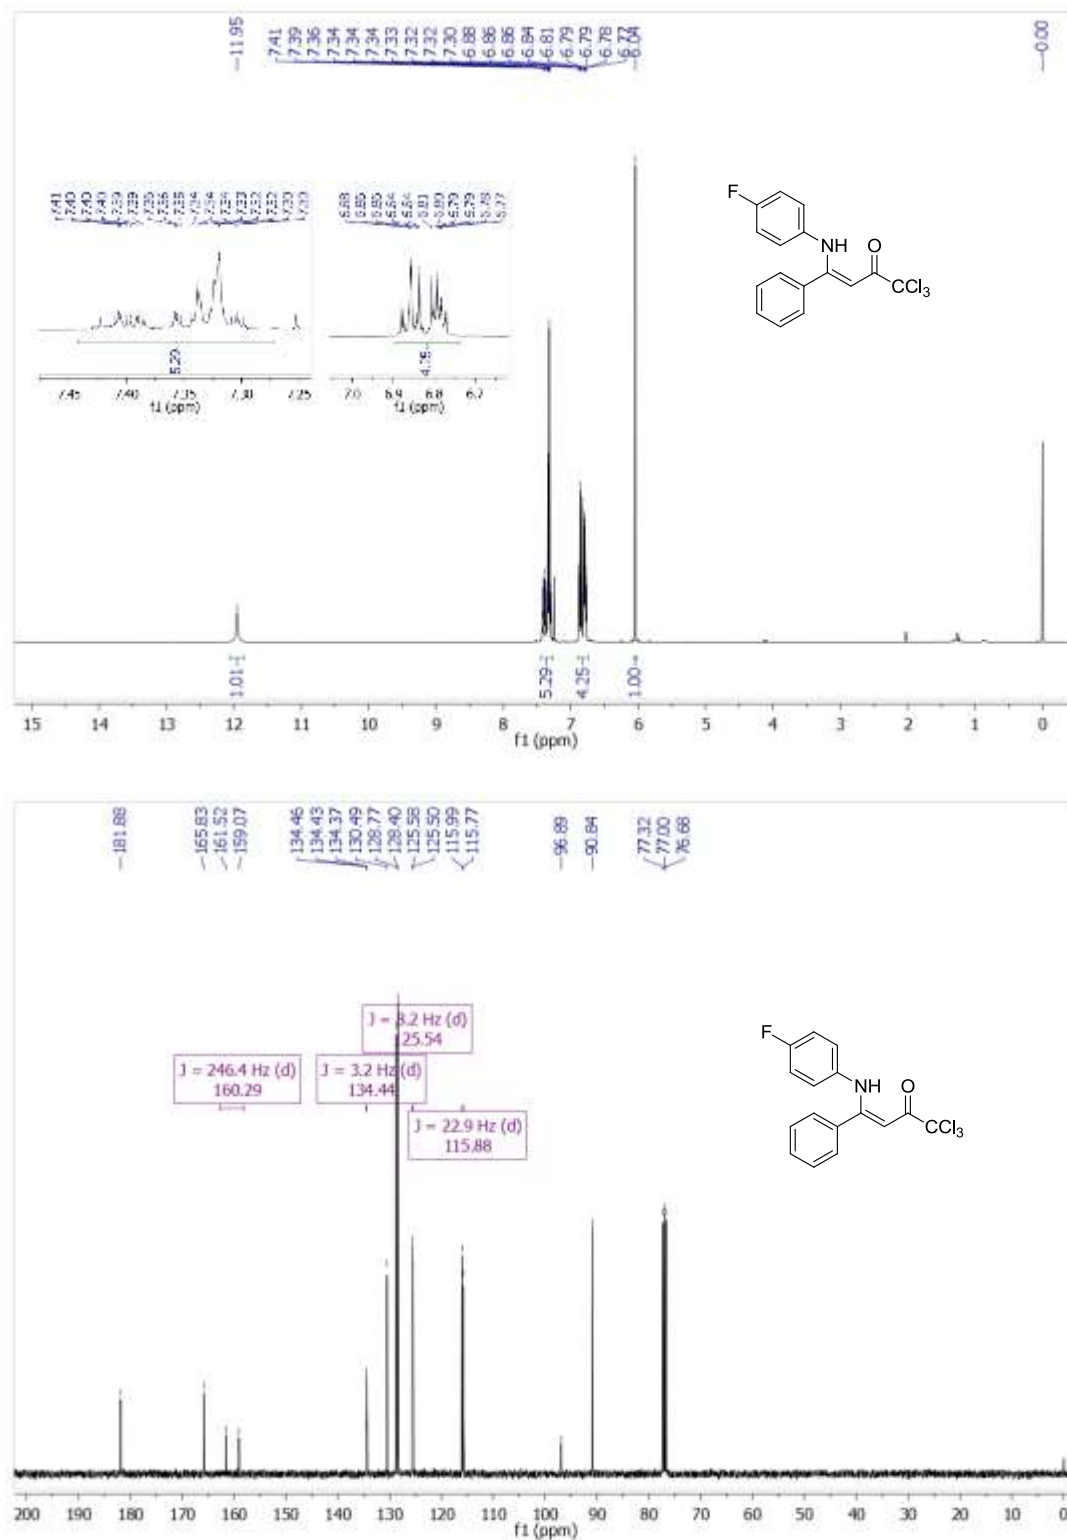

**Figure S7.** <sup>1</sup>H- and <sup>13</sup>C-NMR in CDCl<sub>3</sub> at 400 and 101 MHz, respectively of compound **4g**.

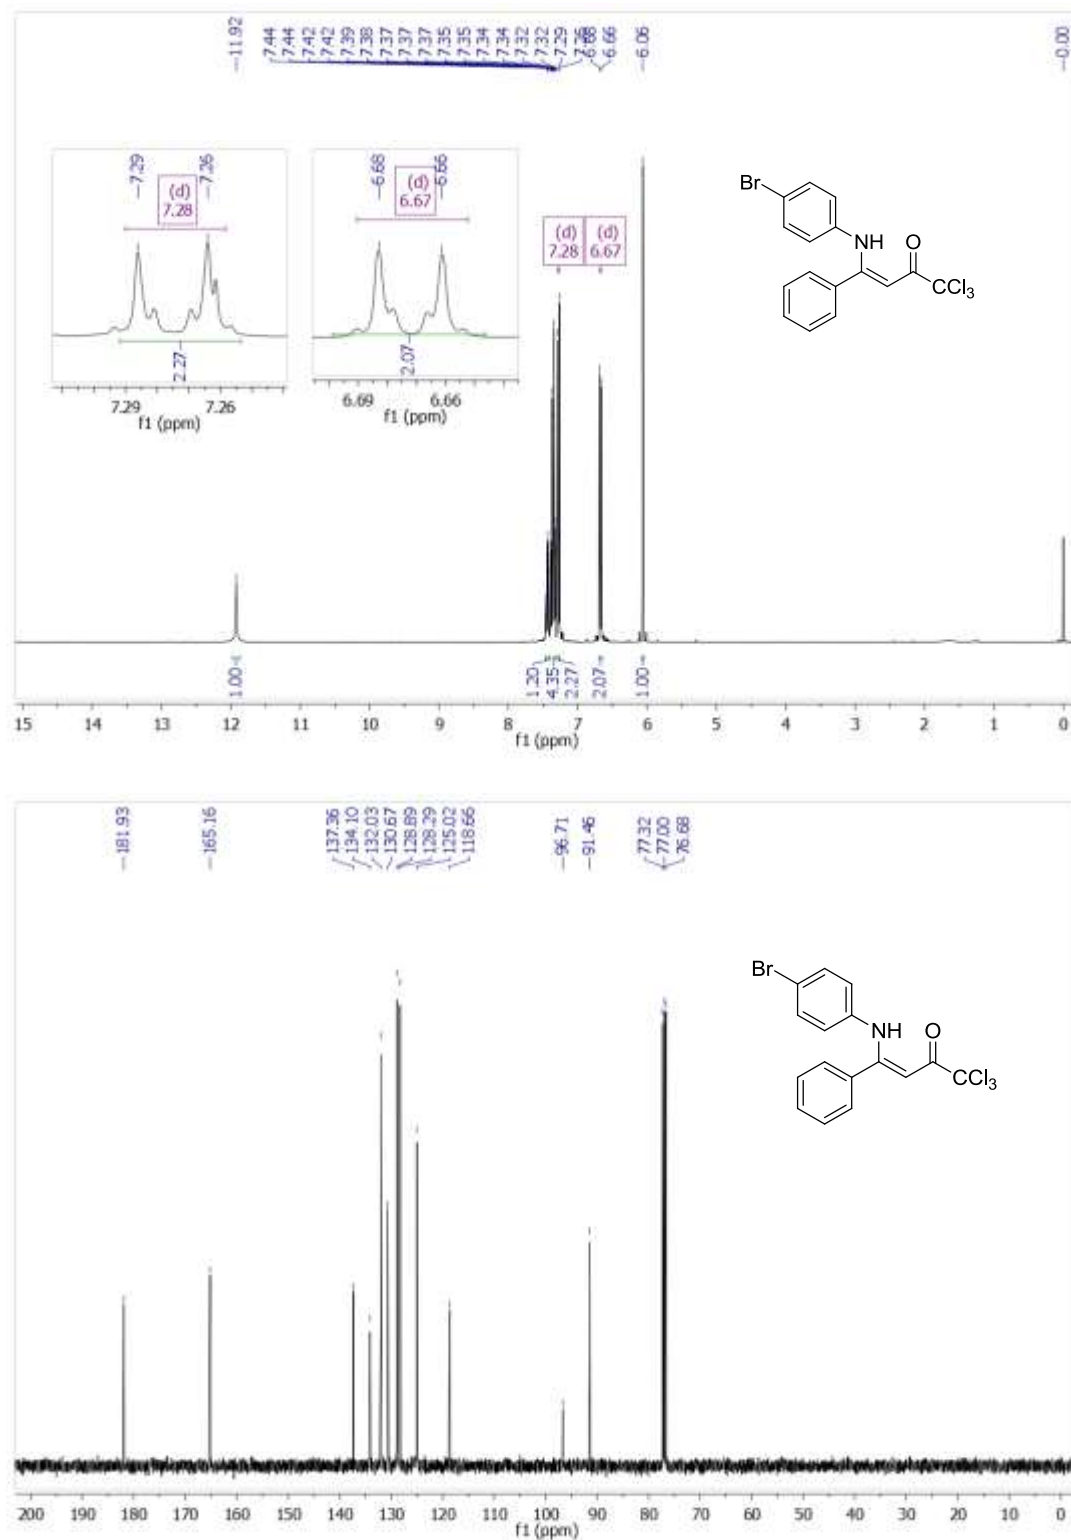

**Figure S8.** <sup>1</sup>H- and <sup>13</sup>C-NMR in CDCl<sub>3</sub> at 400 and 101 MHz, respectively of compound **4h**.

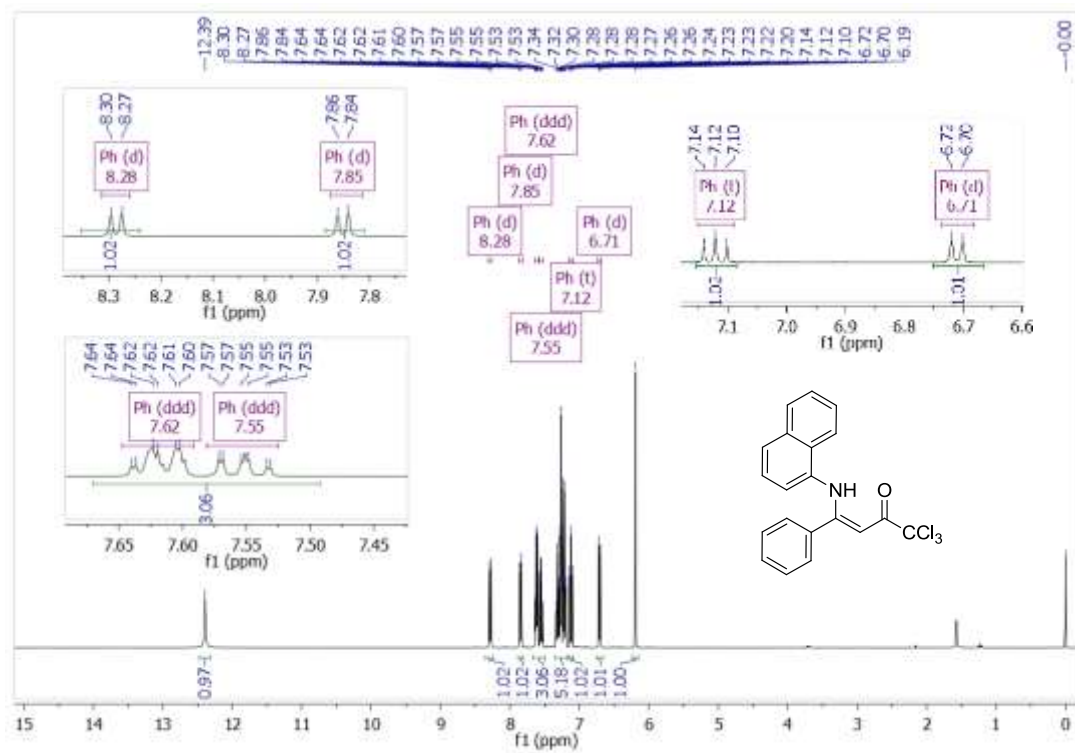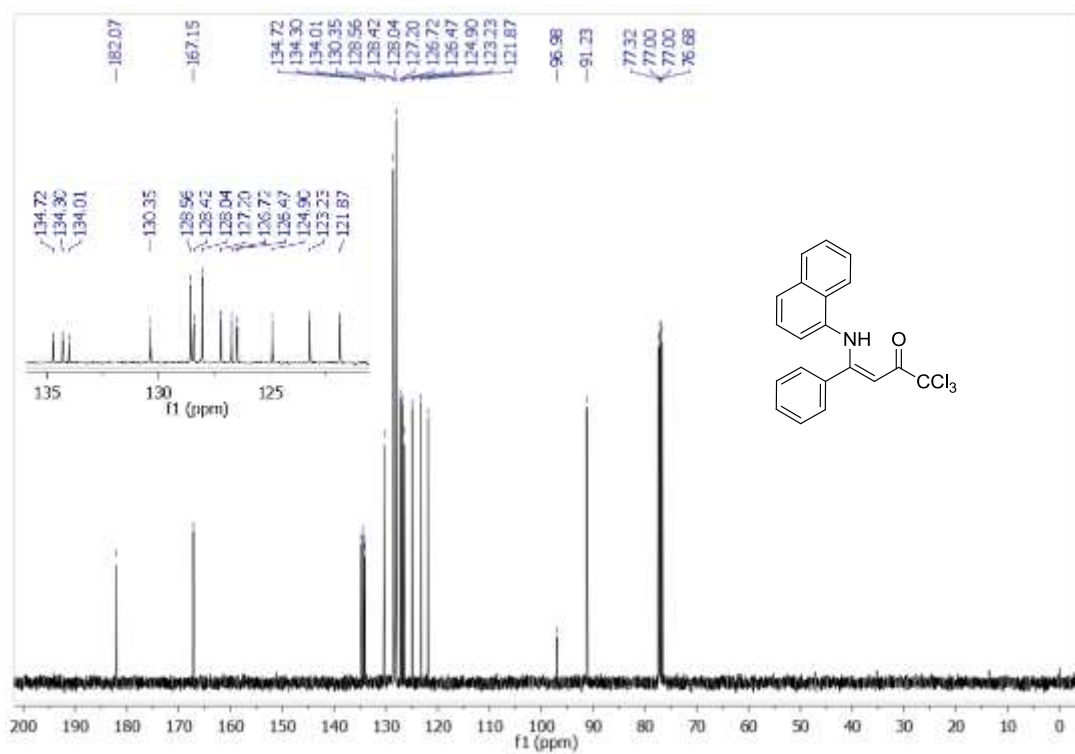

**Figure S9.**  $^1\text{H}$ - and  $^{13}\text{C}$ -NMR in  $\text{CDCl}_3$  at 400 and 101 MHz, respectively of compound **4i**.

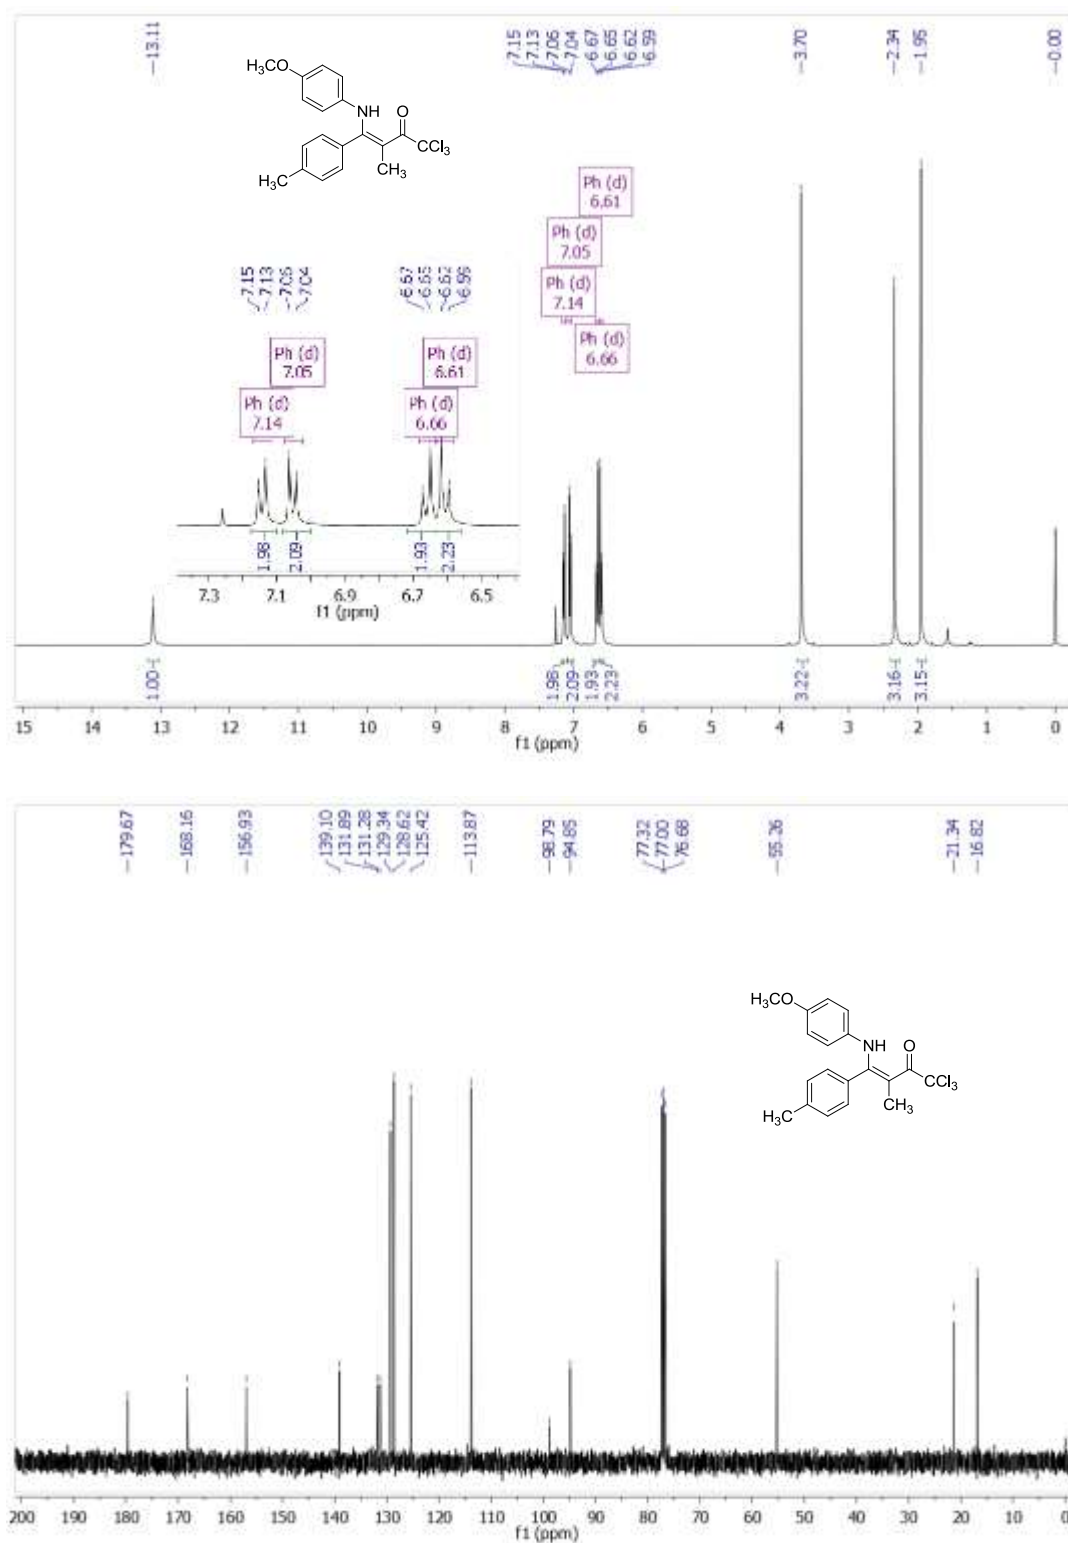

**Figure S10.** <sup>1</sup>H- and <sup>13</sup>C-NMR in CDCl<sub>3</sub> at 400 and 101 MHz, respectively of compound **5e**.

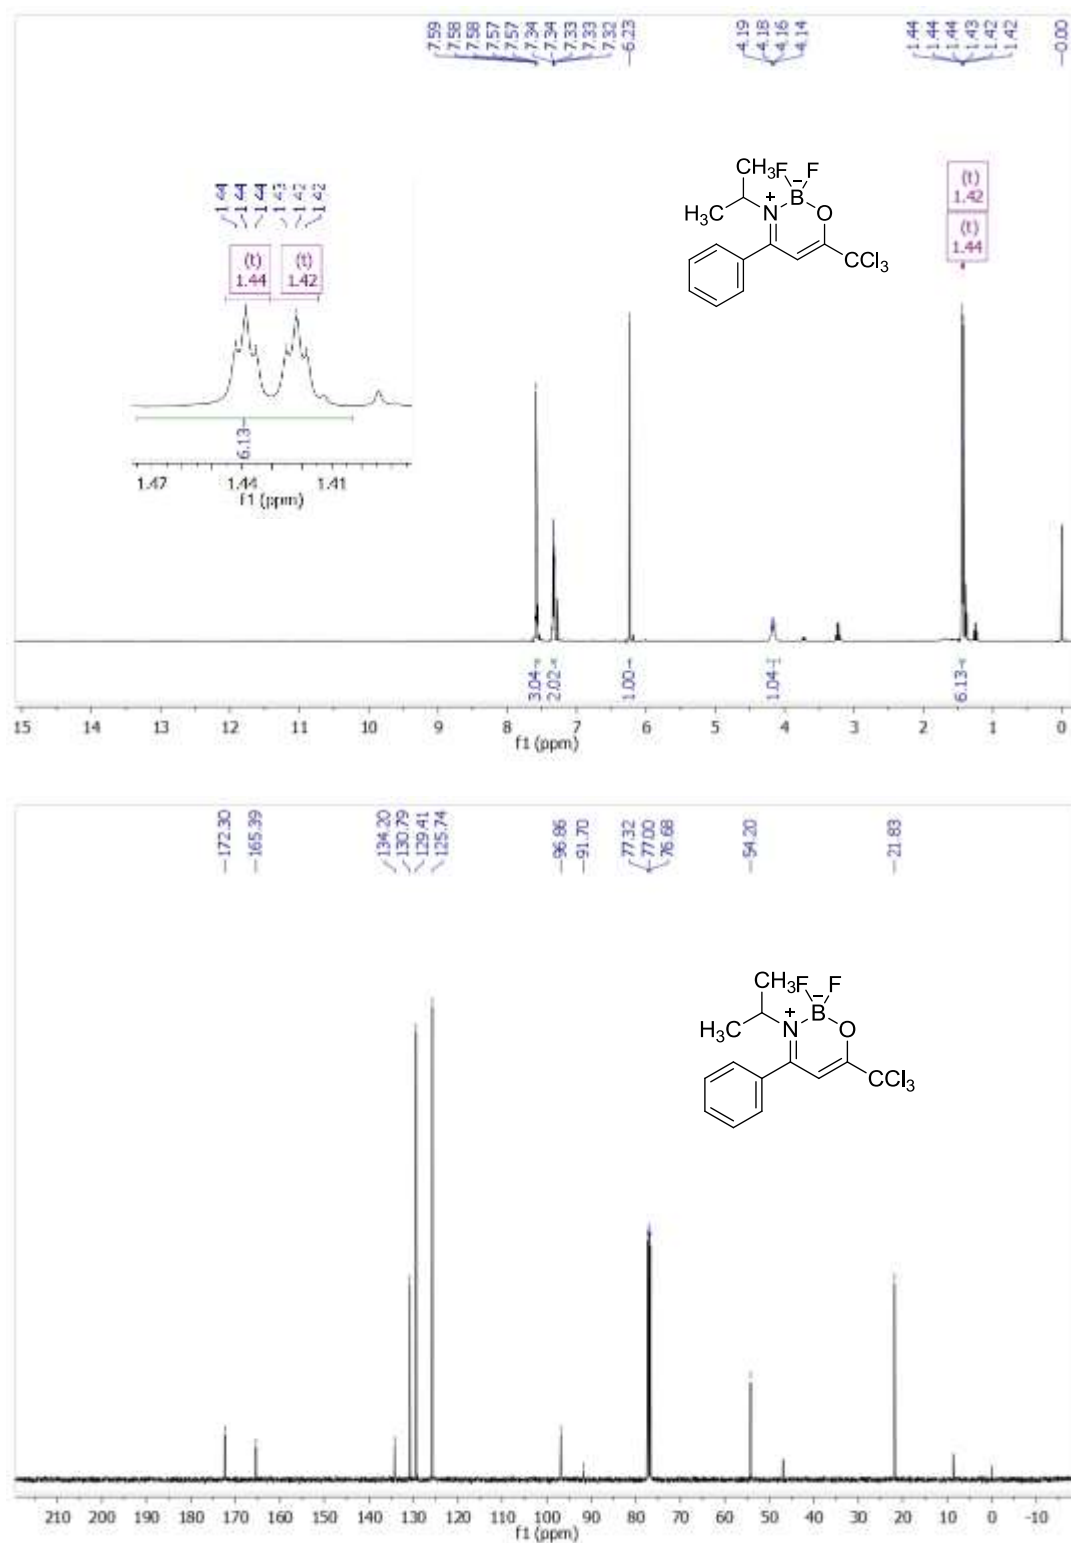

**Figure S11.** <sup>1</sup>H- and <sup>13</sup>C-NMR in CDCl<sub>3</sub> at 400 and 101 MHz, respectively of compound **6a**.

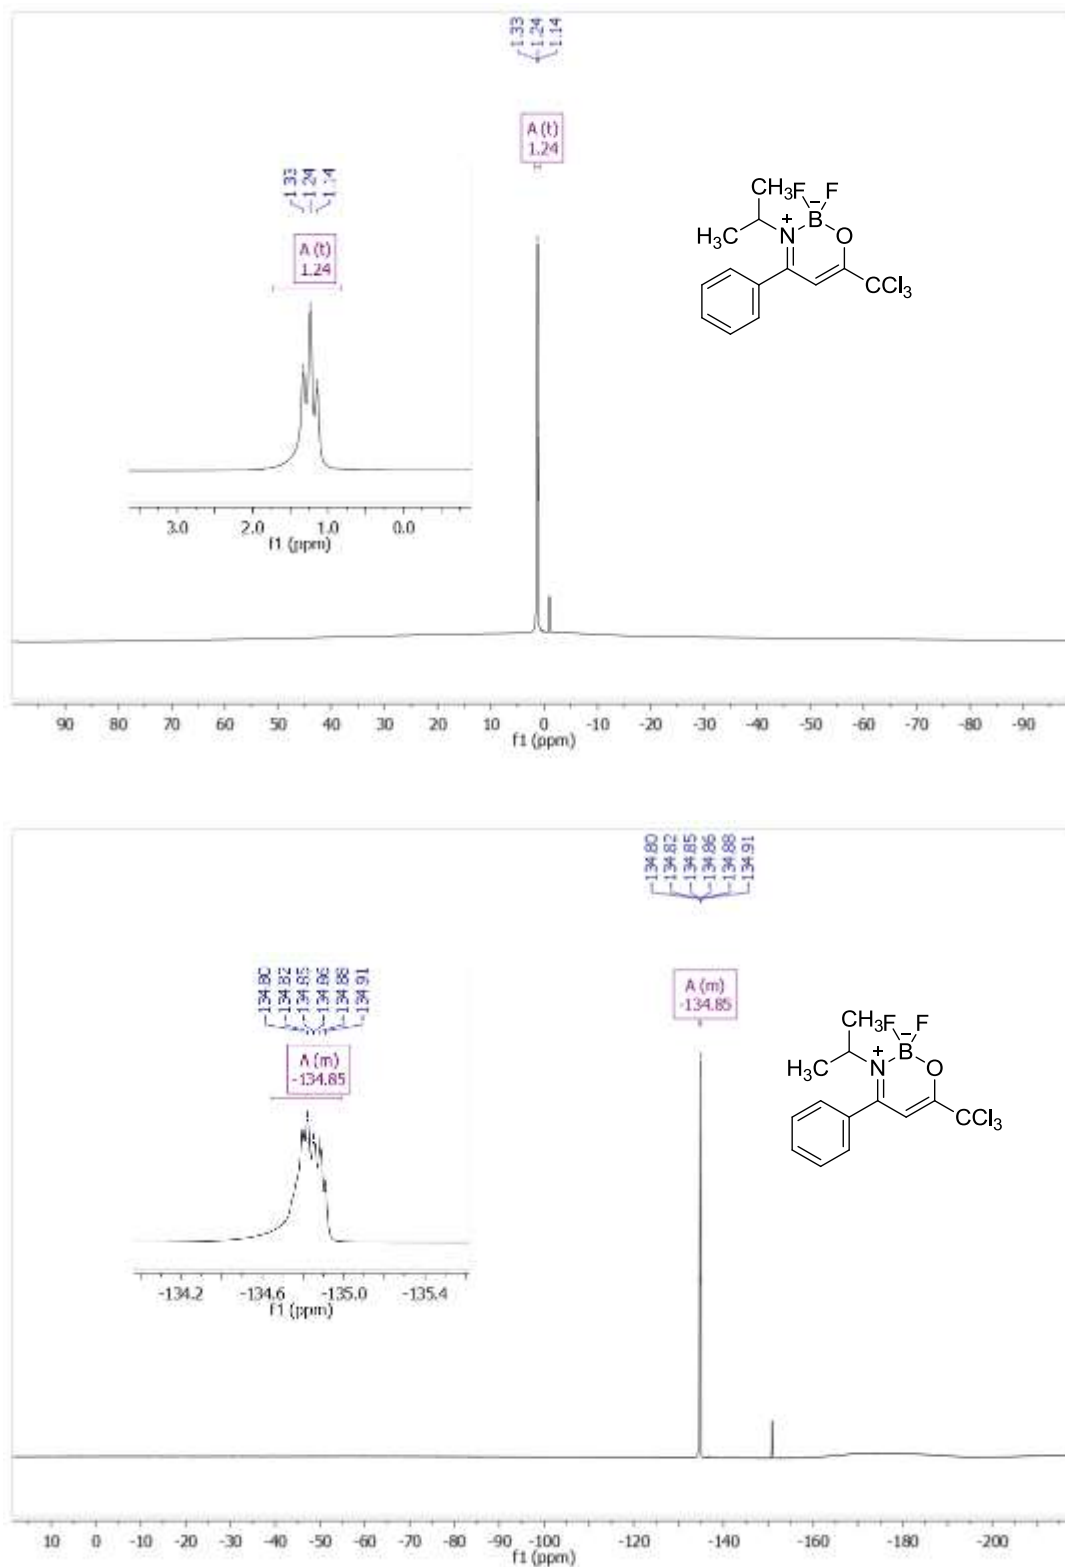

**Figure S12.**  $^{11}\text{B}$  and  $^{19}\text{F}$ -NMR in  $\text{CDCl}_3$  at 193 and 565 MHz, respectively of compound **6a**.

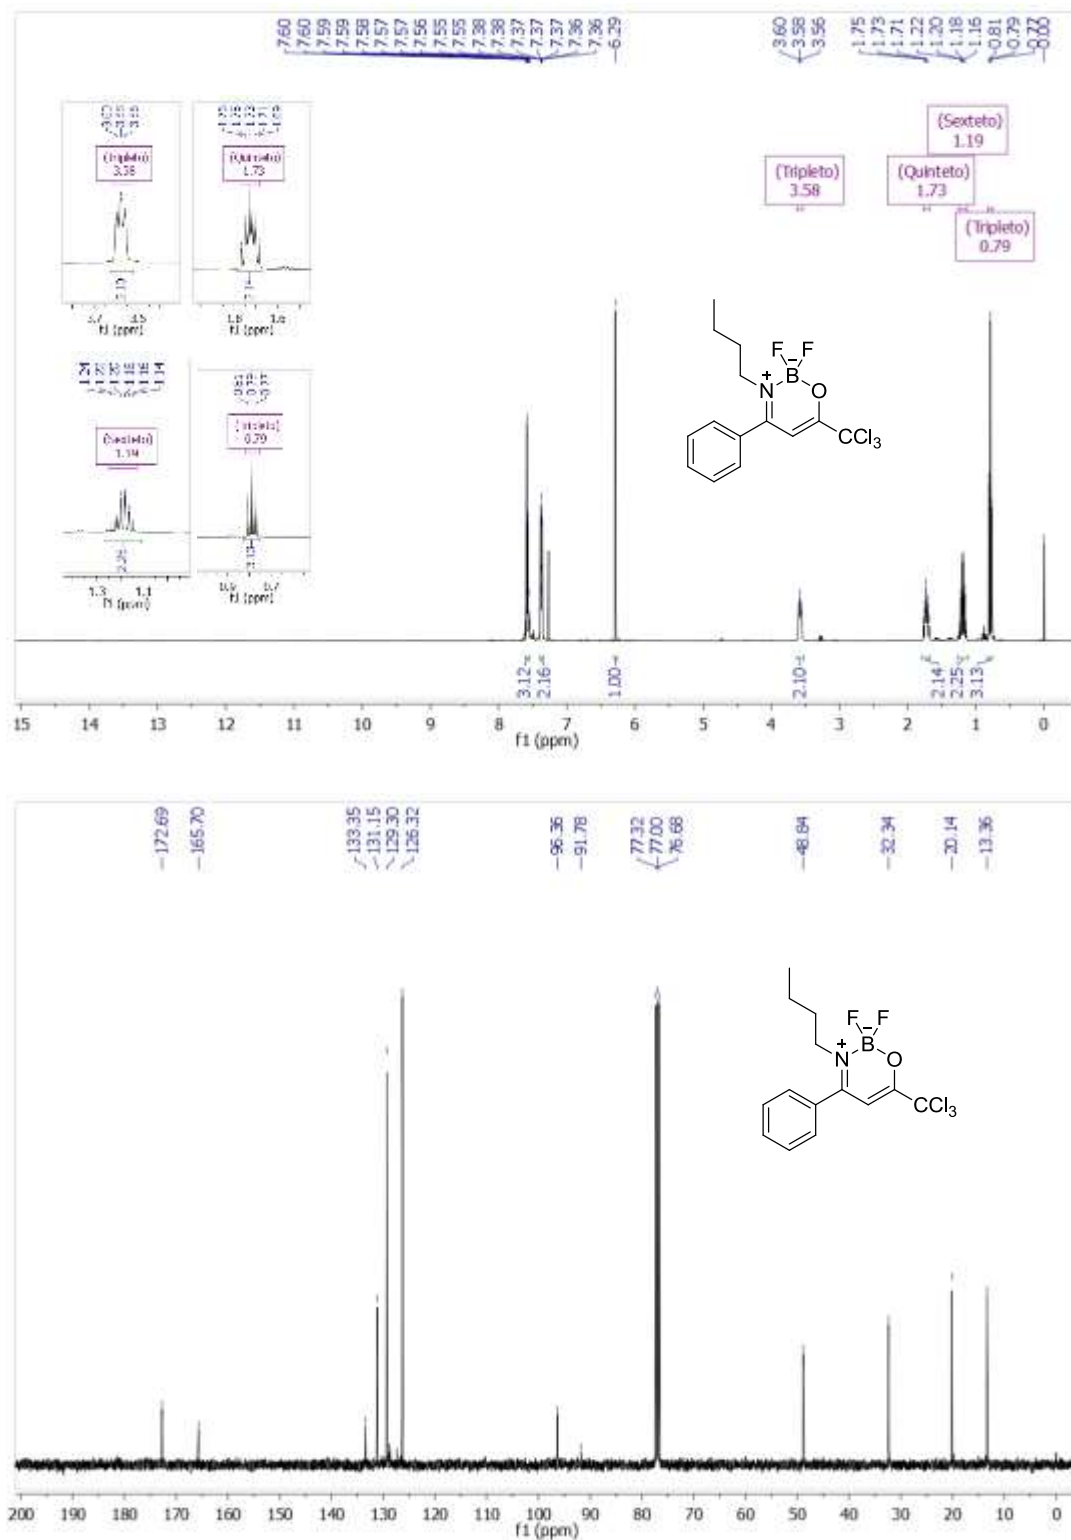

**Figure S13.** <sup>1</sup>H- and <sup>13</sup>C-NMR in CDCl<sub>3</sub> at 400 and 101 MHz, respectively of compound **6b**.

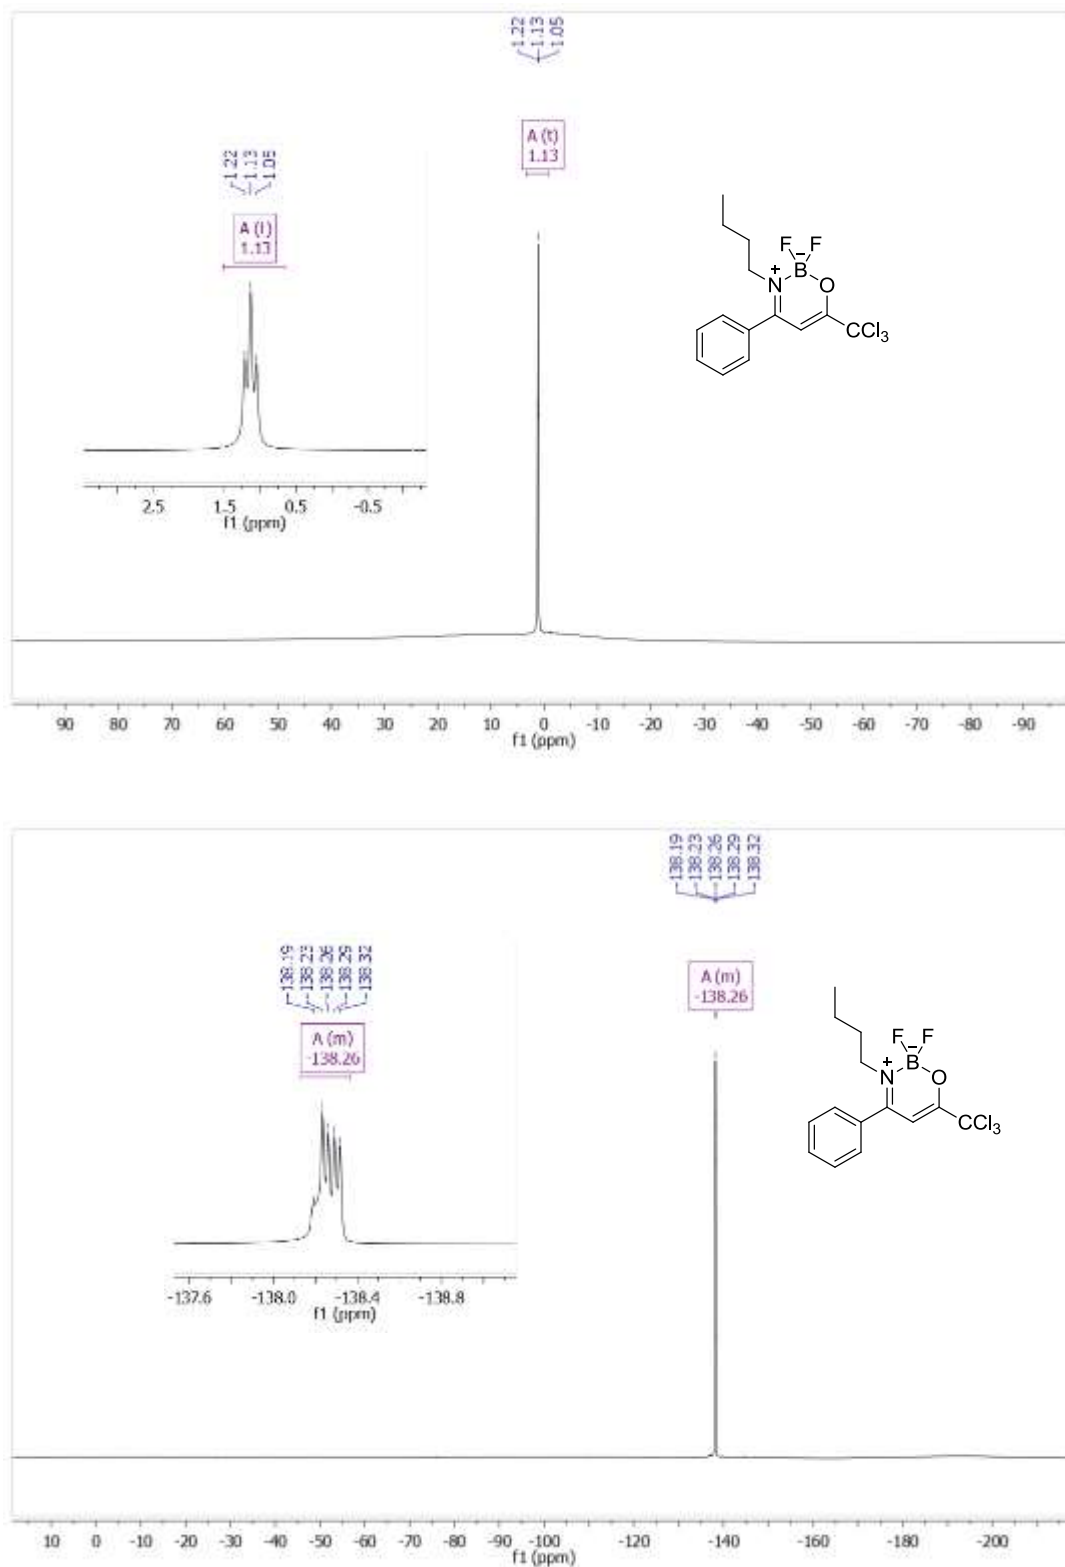

**Figure S14.**  $^{11}\text{B}$  and  $^{19}\text{F}$ -NMR in  $\text{CDCl}_3$  at 193 and 565 MHz, respectively of compound **6b**.



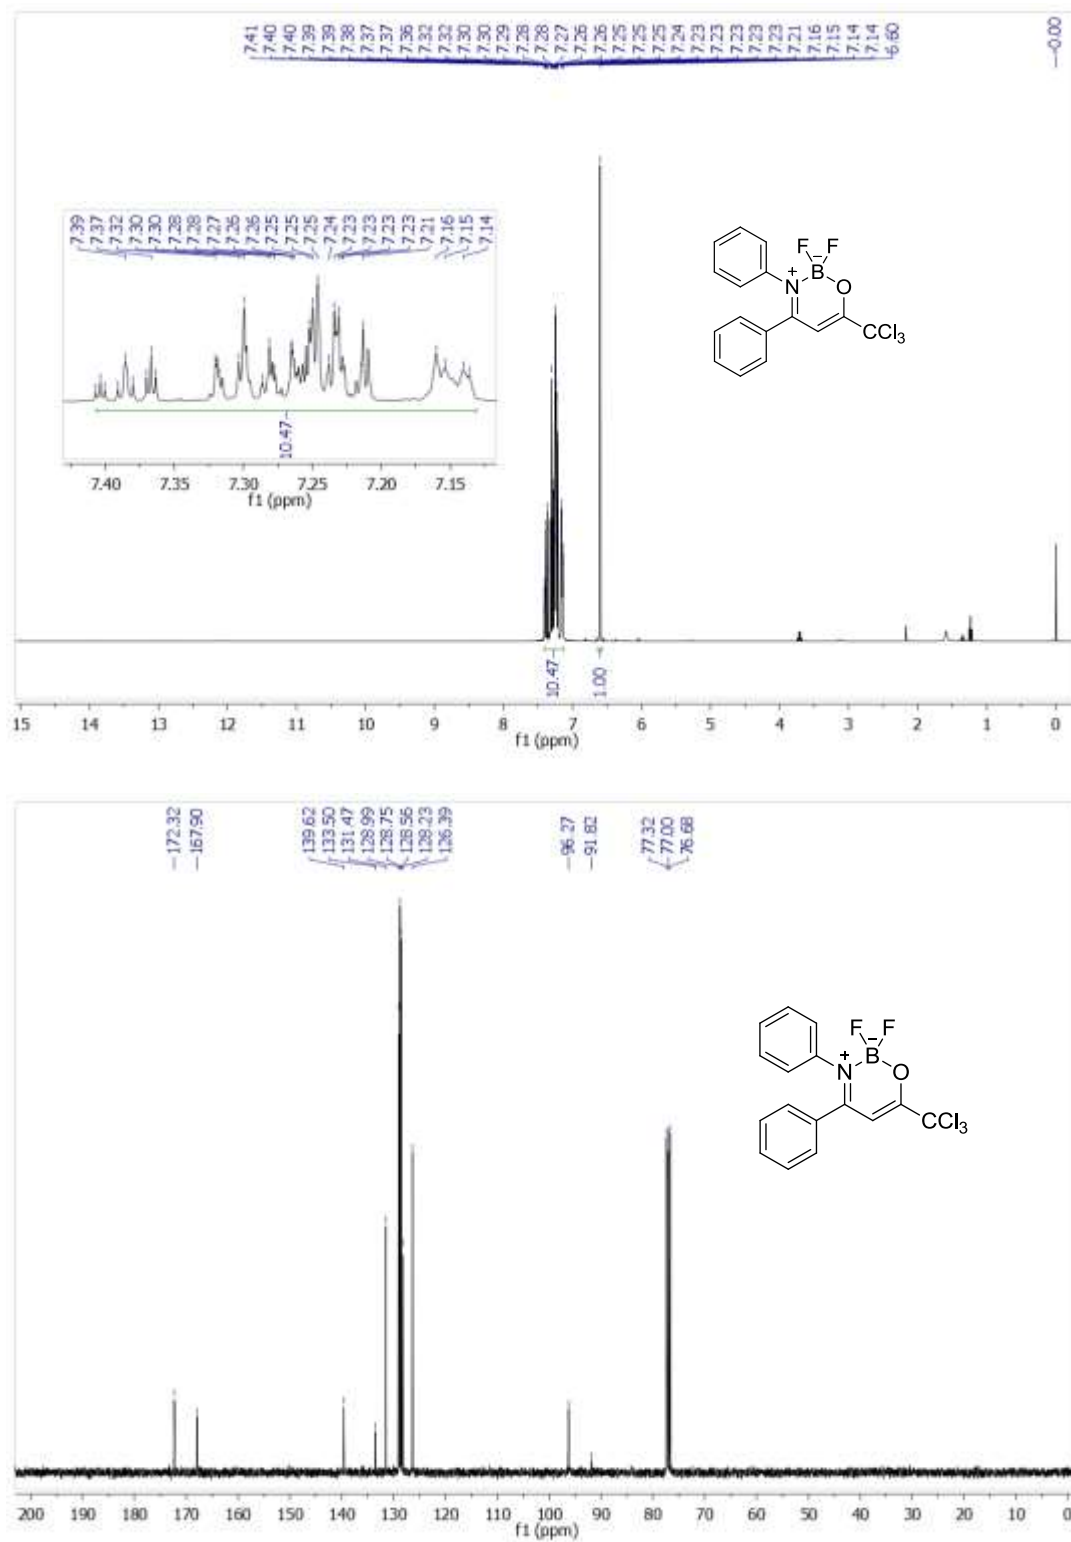

**Figure S15.** <sup>1</sup>H- and <sup>13</sup>C-NMR in CDCl<sub>3</sub> at 400 and 101 MHz, respectively of compound **6c**.

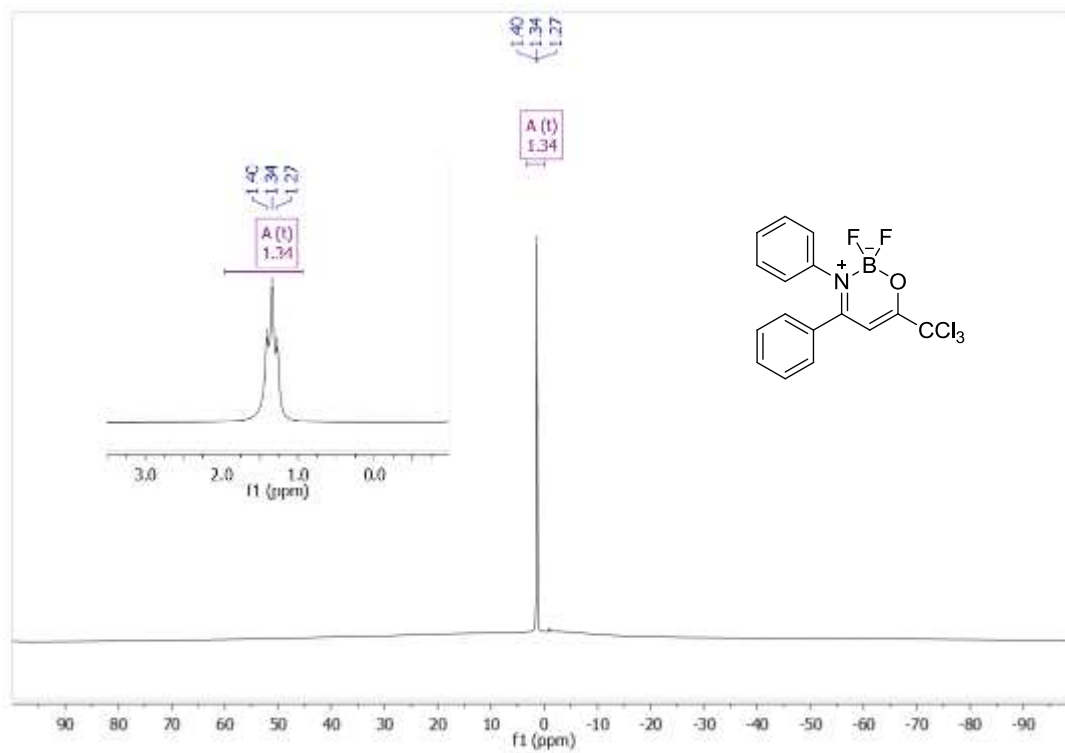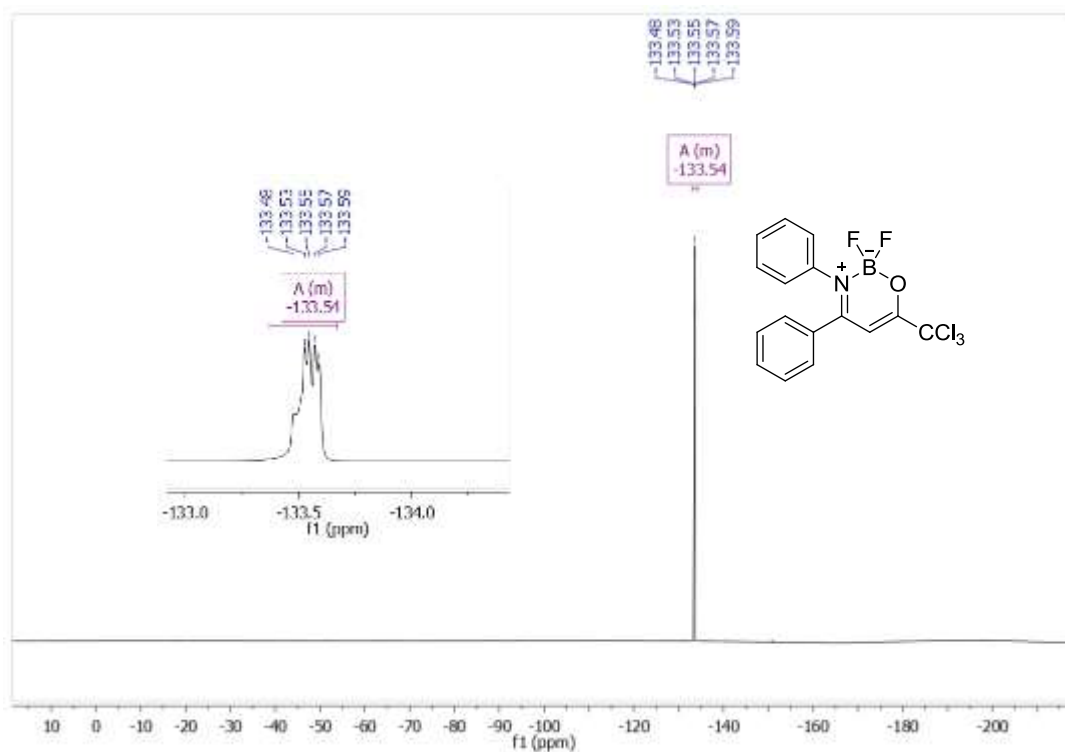

**Figure S16.** <sup>11</sup>B- and <sup>19</sup>F-NMR in CDCl<sub>3</sub> at 193 and 565 MHz respectively of compound **6c**.

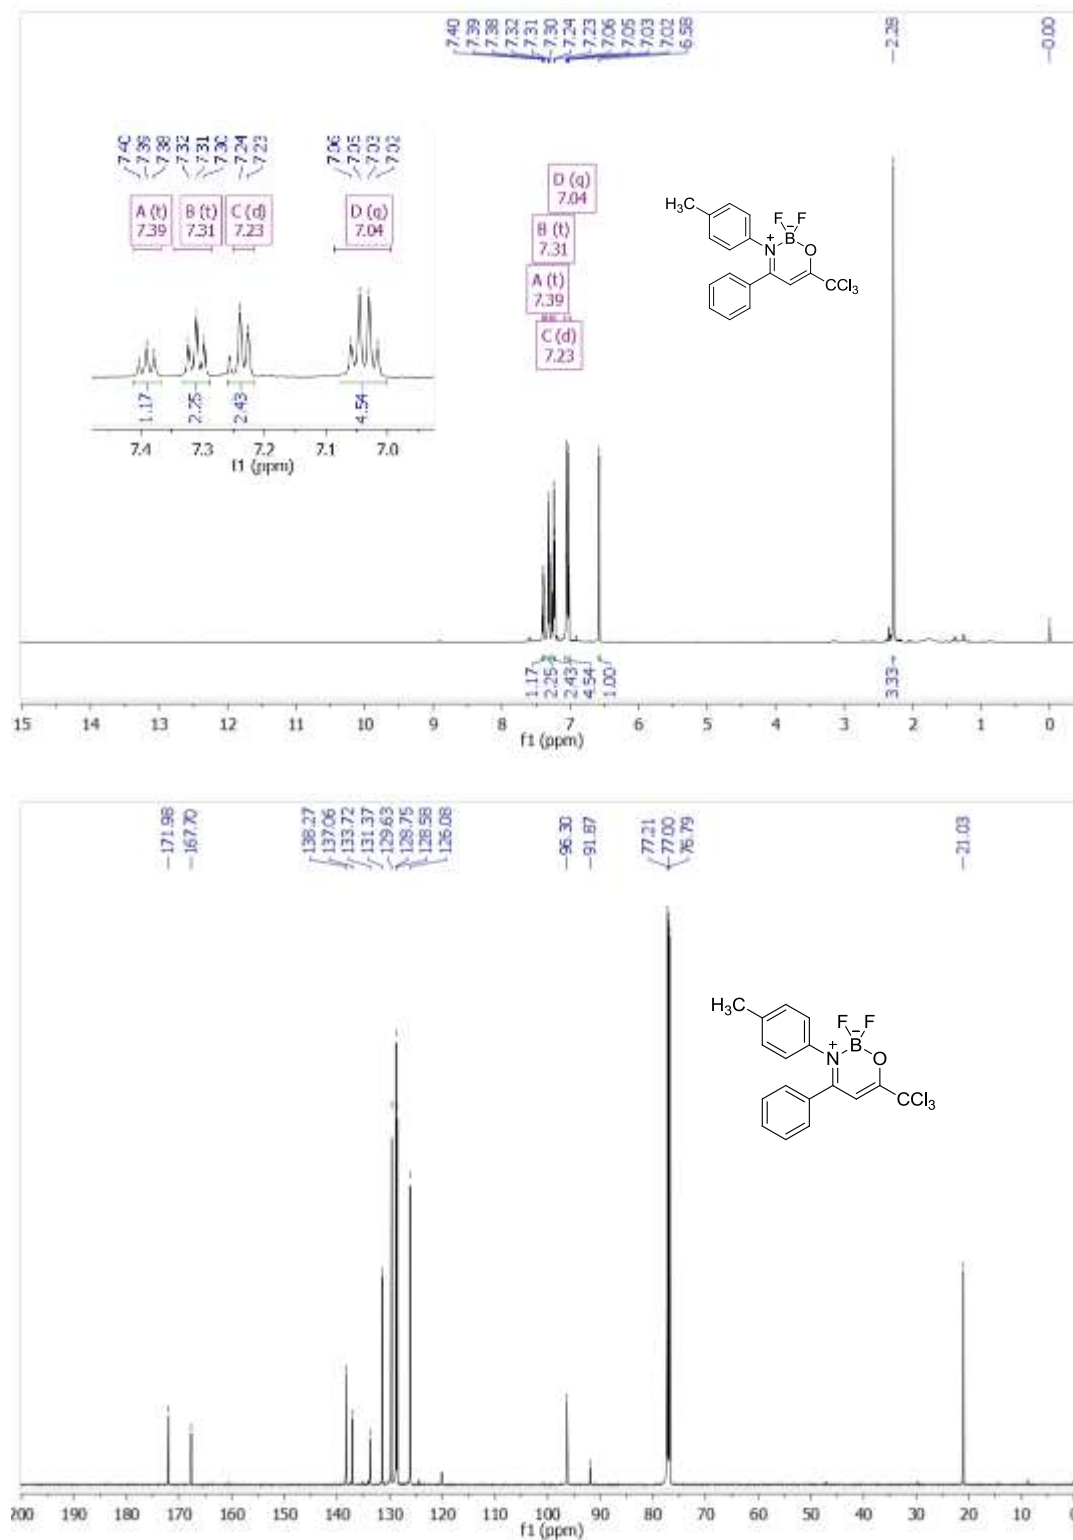

**Figure S17.** <sup>1</sup>H- and <sup>13</sup>C-NMR in CDCl<sub>3</sub> at 600 and 151 MHz, respectively of compound **6d**.

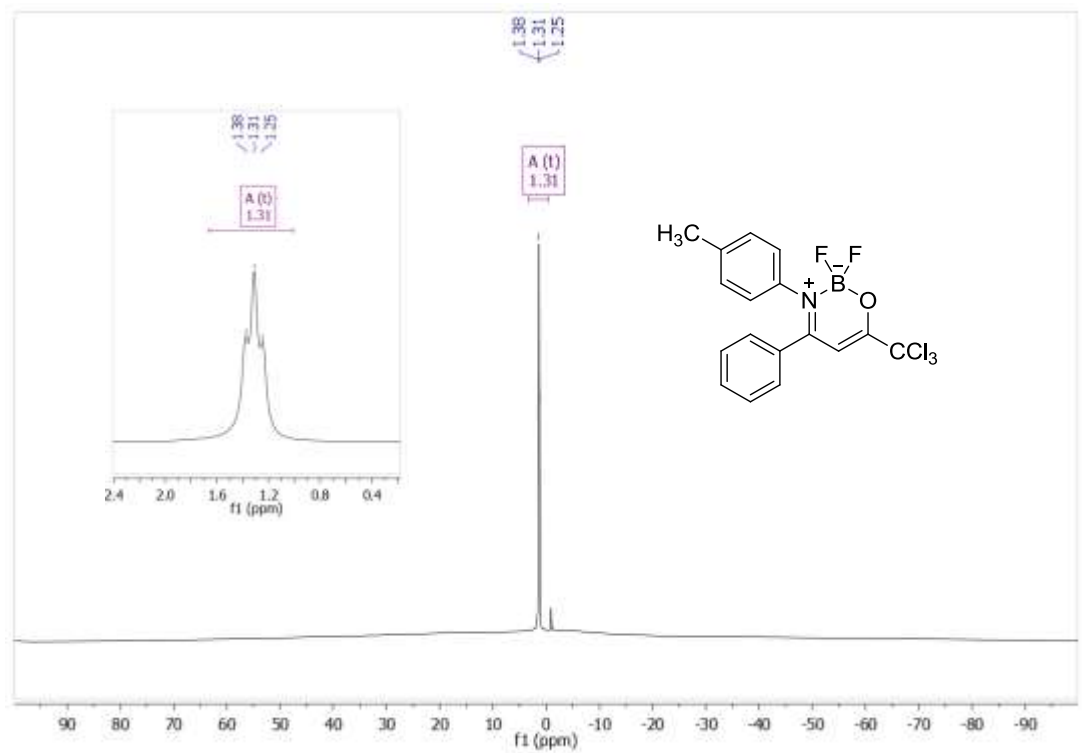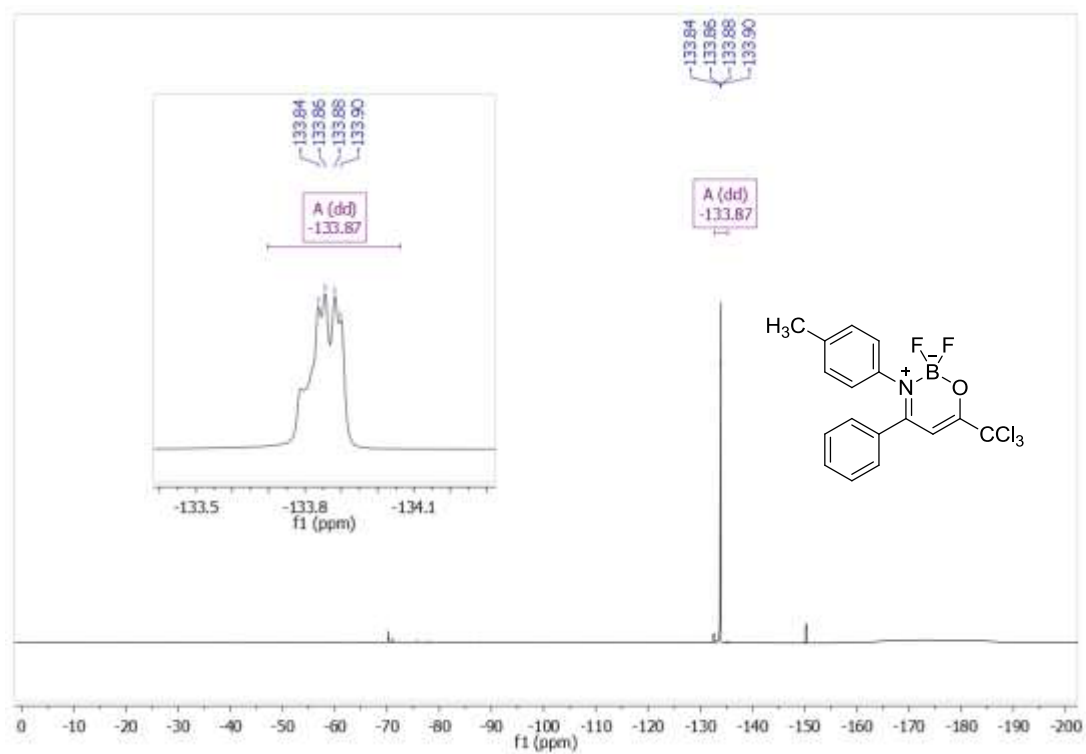

**Figure S18.** <sup>11</sup>B- and <sup>19</sup>F-NMR in CDCl<sub>3</sub> at 193 and 565 MHz, respectively of compound **6d**.

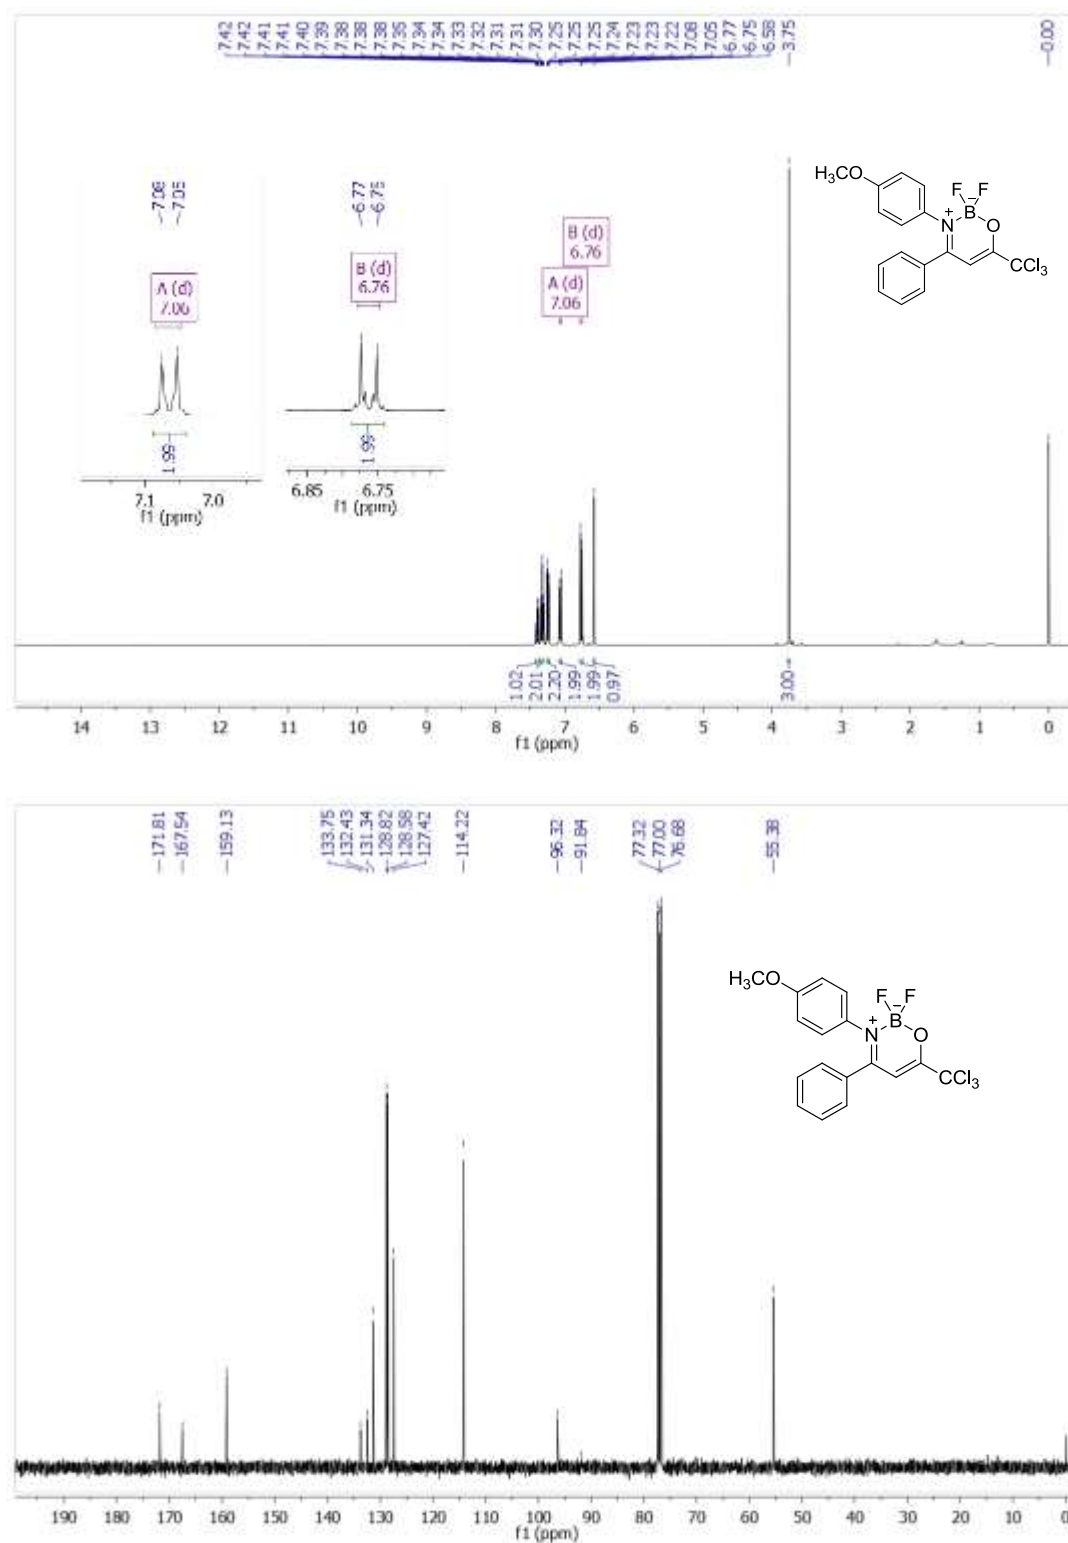

**Figure S19.** <sup>1</sup>H- and <sup>13</sup>C-NMR in CDCl<sub>3</sub> at 400 and 101 MHz, respectively of compound **6e**.

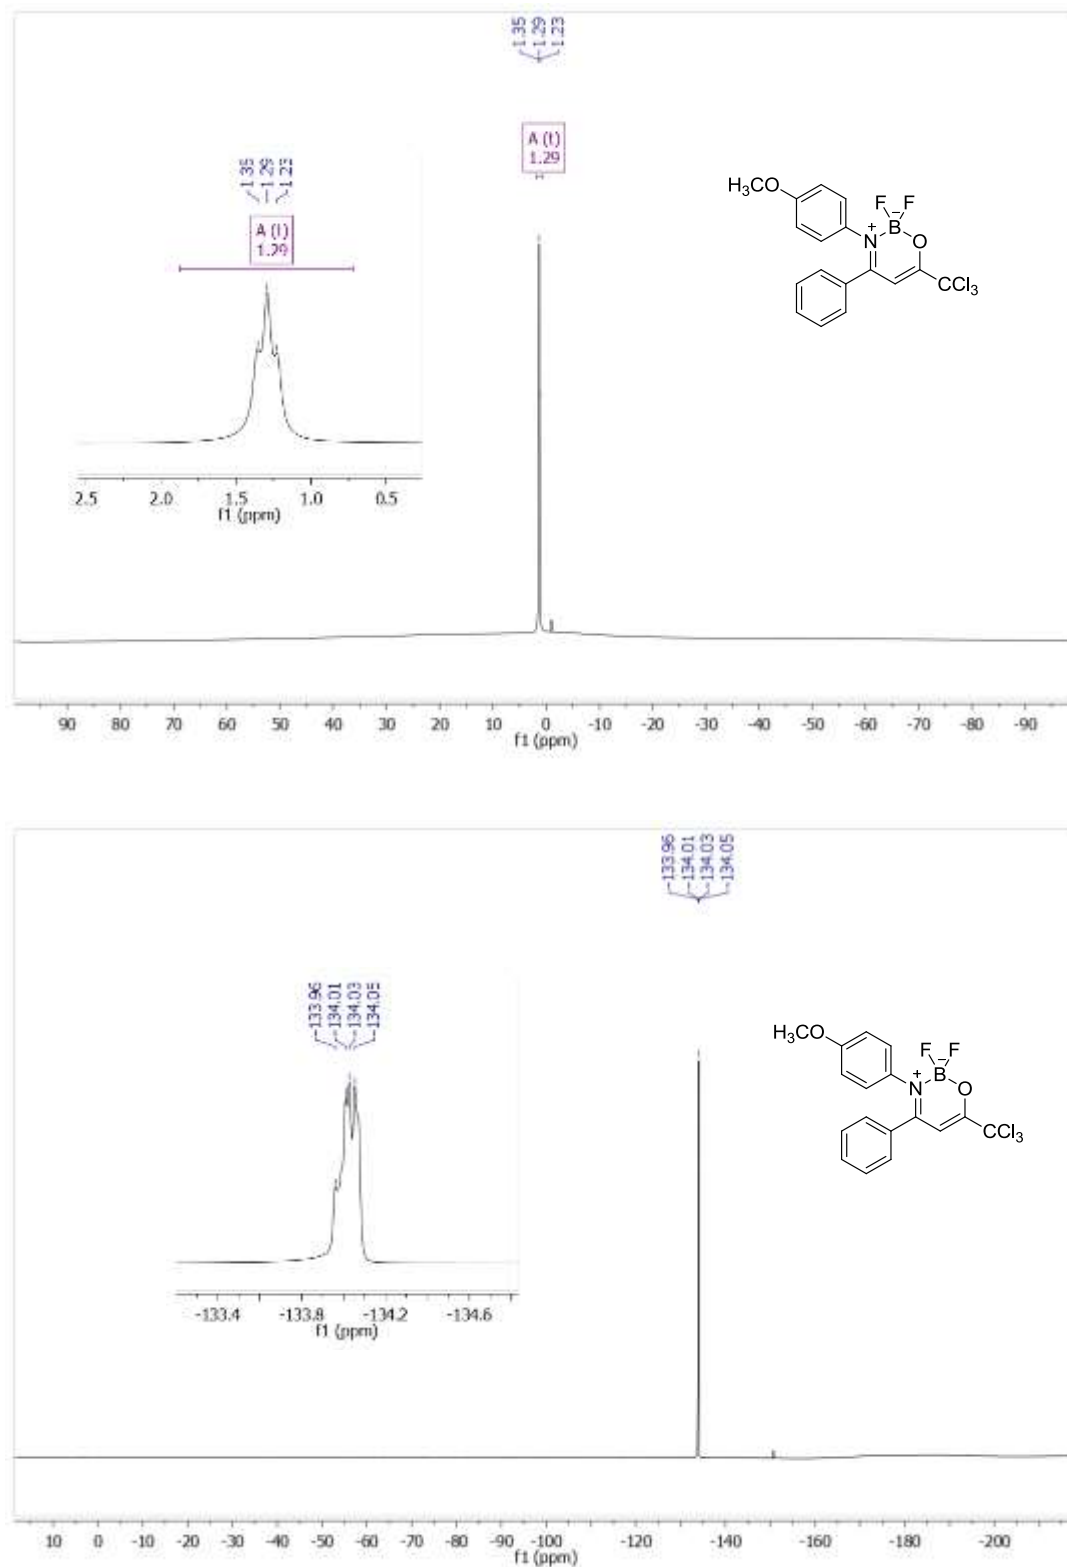

**Figure S20.**  $^{11}\text{B}$ - and  $^{19}\text{F}$ -NMR in  $\text{CDCl}_3$  at 193 and 565 MHz, respectively of compound **6e**.

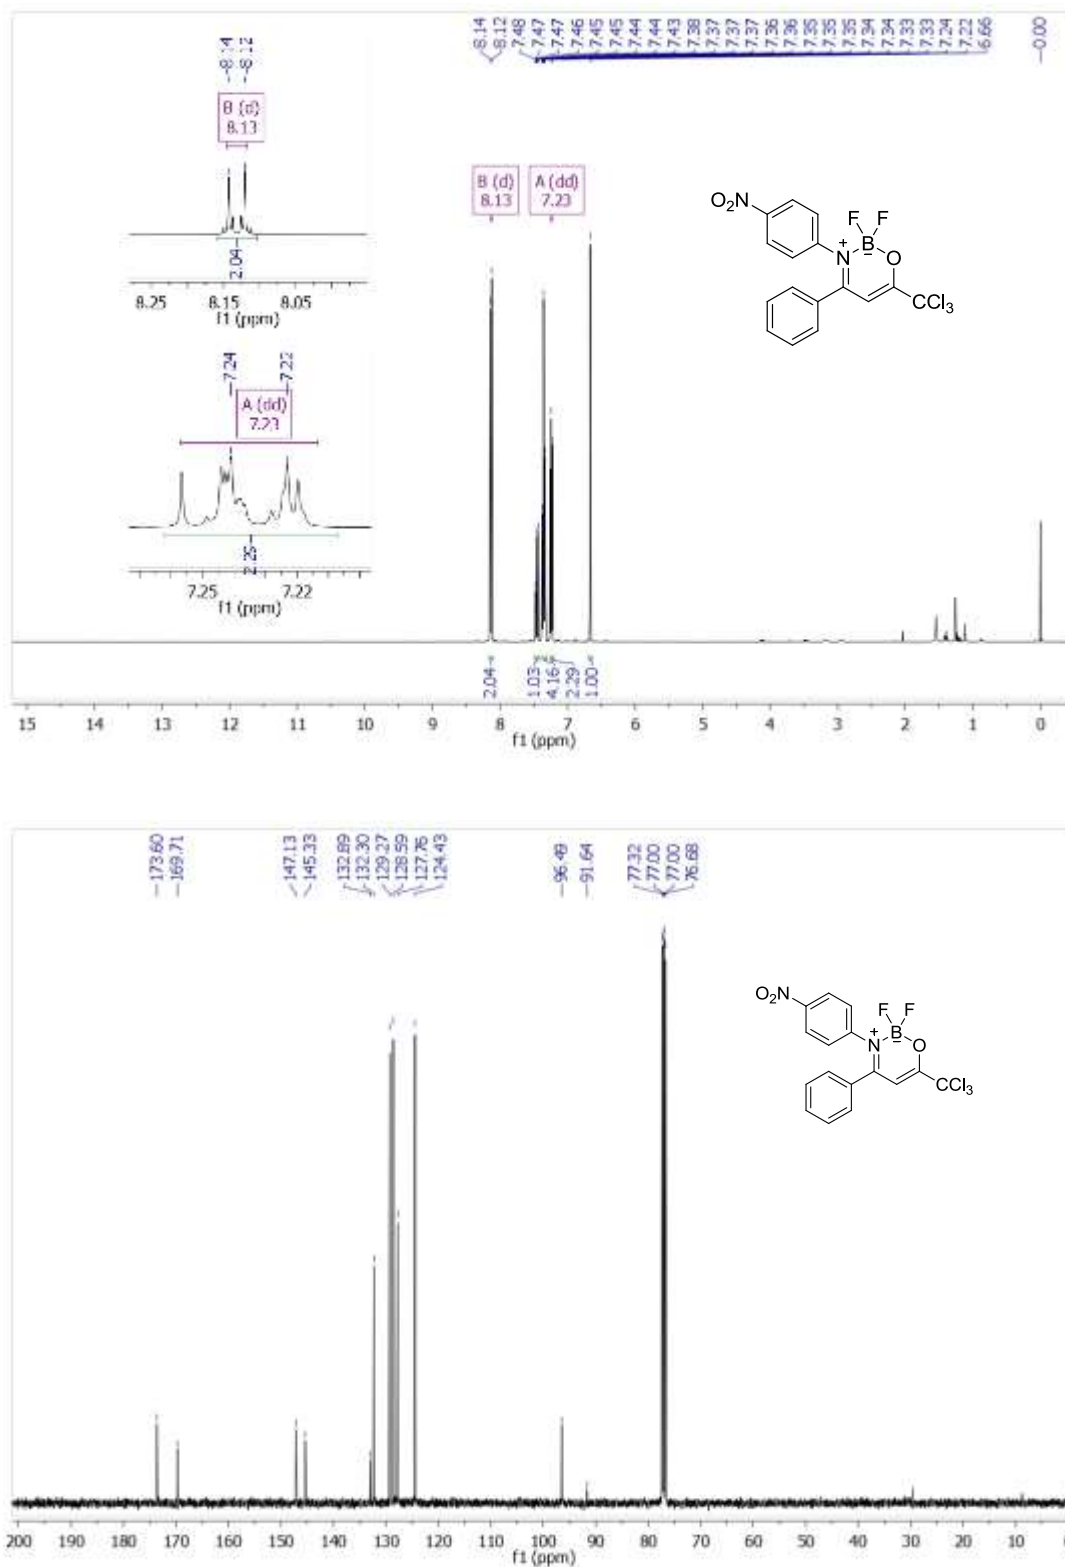

**Figure S21.** <sup>1</sup>H- and <sup>13</sup>C-NMR in CDCl<sub>3</sub> at 400 and 101 MHz, respectively of compound **6f**.

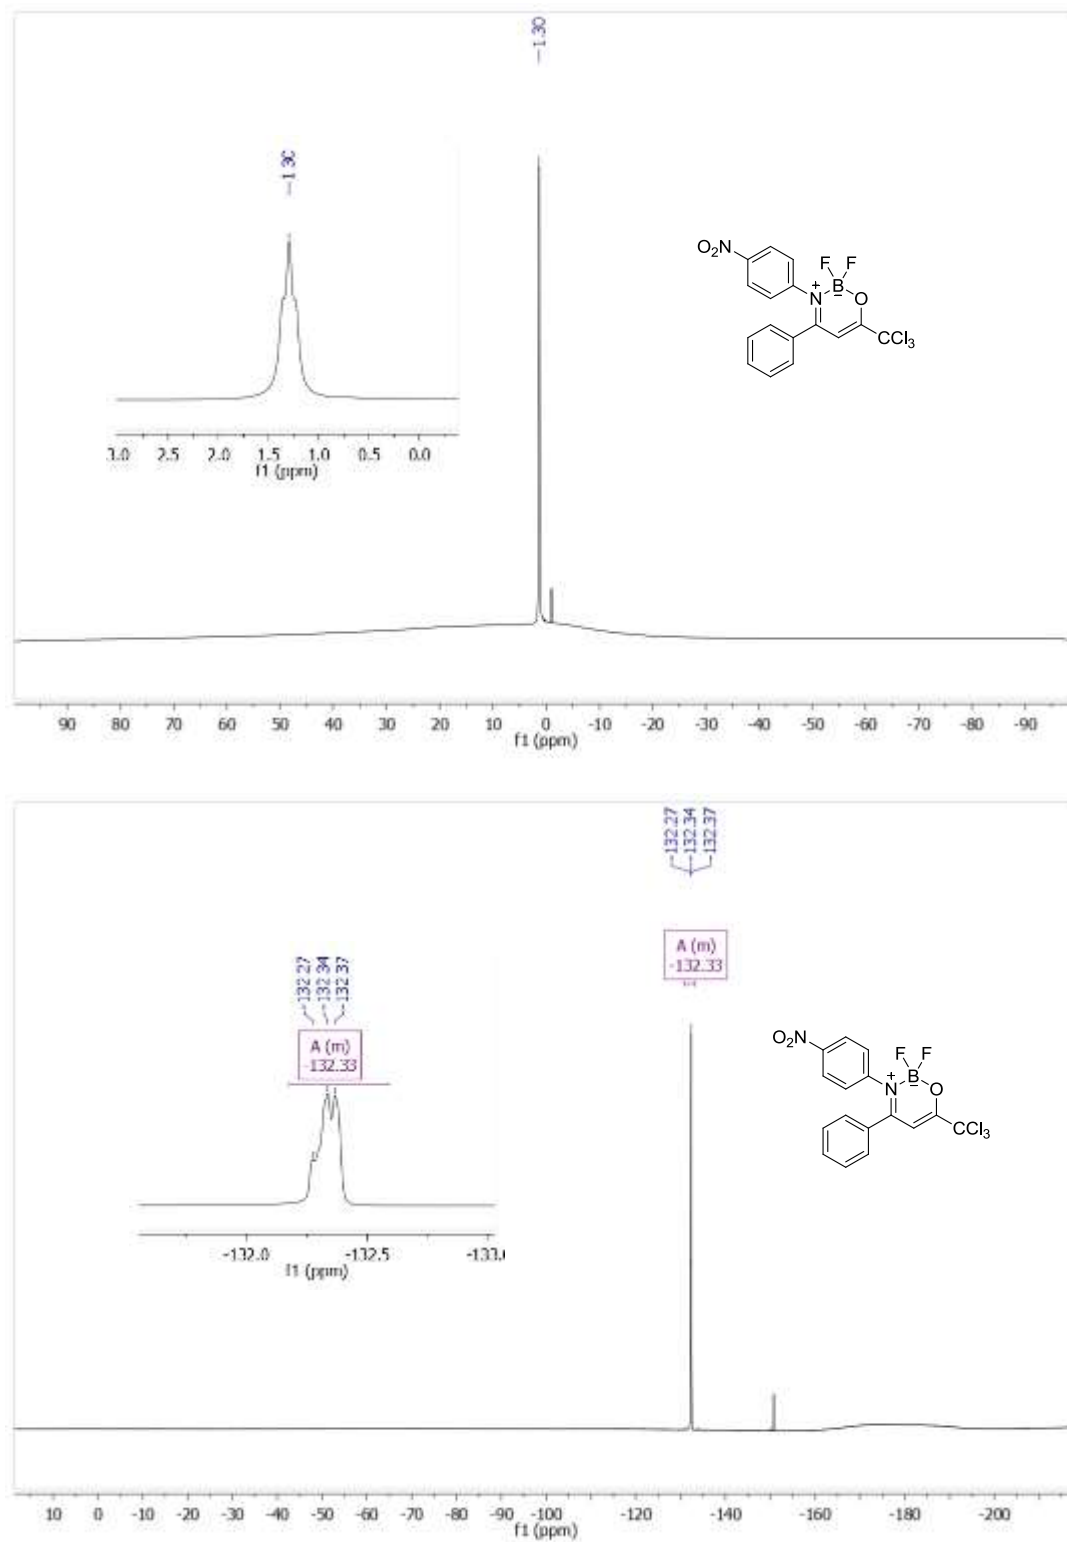

**Figure S22.**  $^{11}\text{B}$ - and  $^{19}\text{F}$ -NMR in  $\text{CDCl}_3$  at 193 and 565 MHz, respectively of compound **6f**.



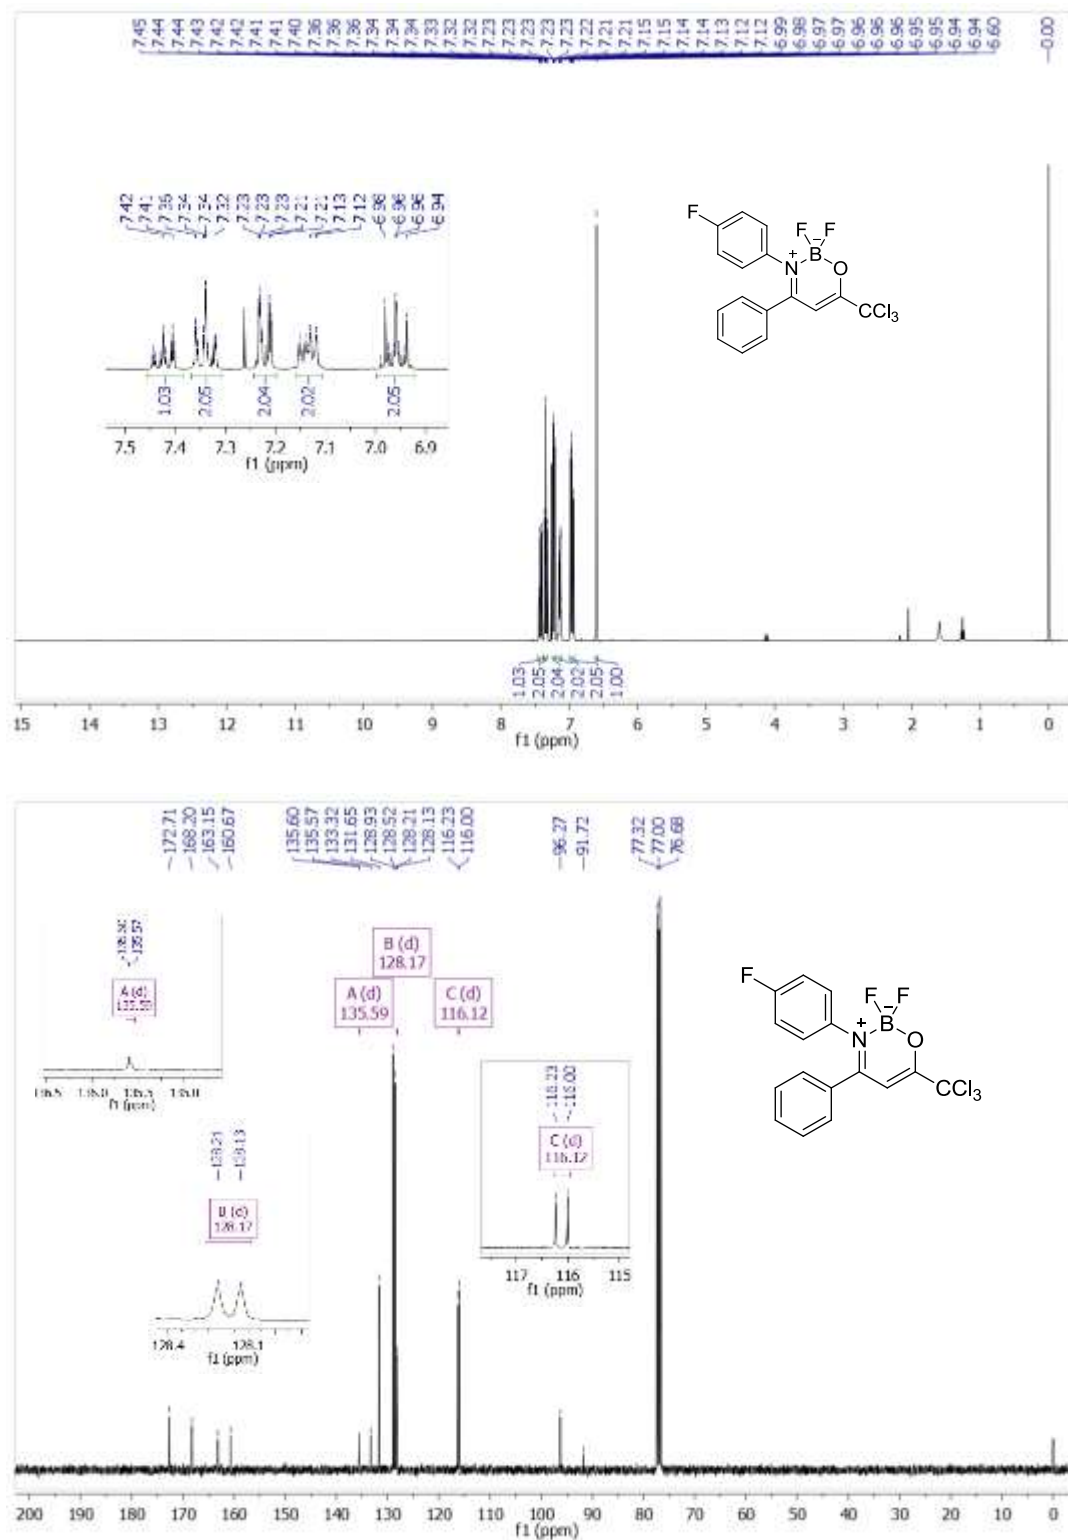

**Figure S23.** <sup>1</sup>H- and <sup>13</sup>C-NMR in CDCl<sub>3</sub> at 400 and 101 MHz, respectively of compound **6g**.

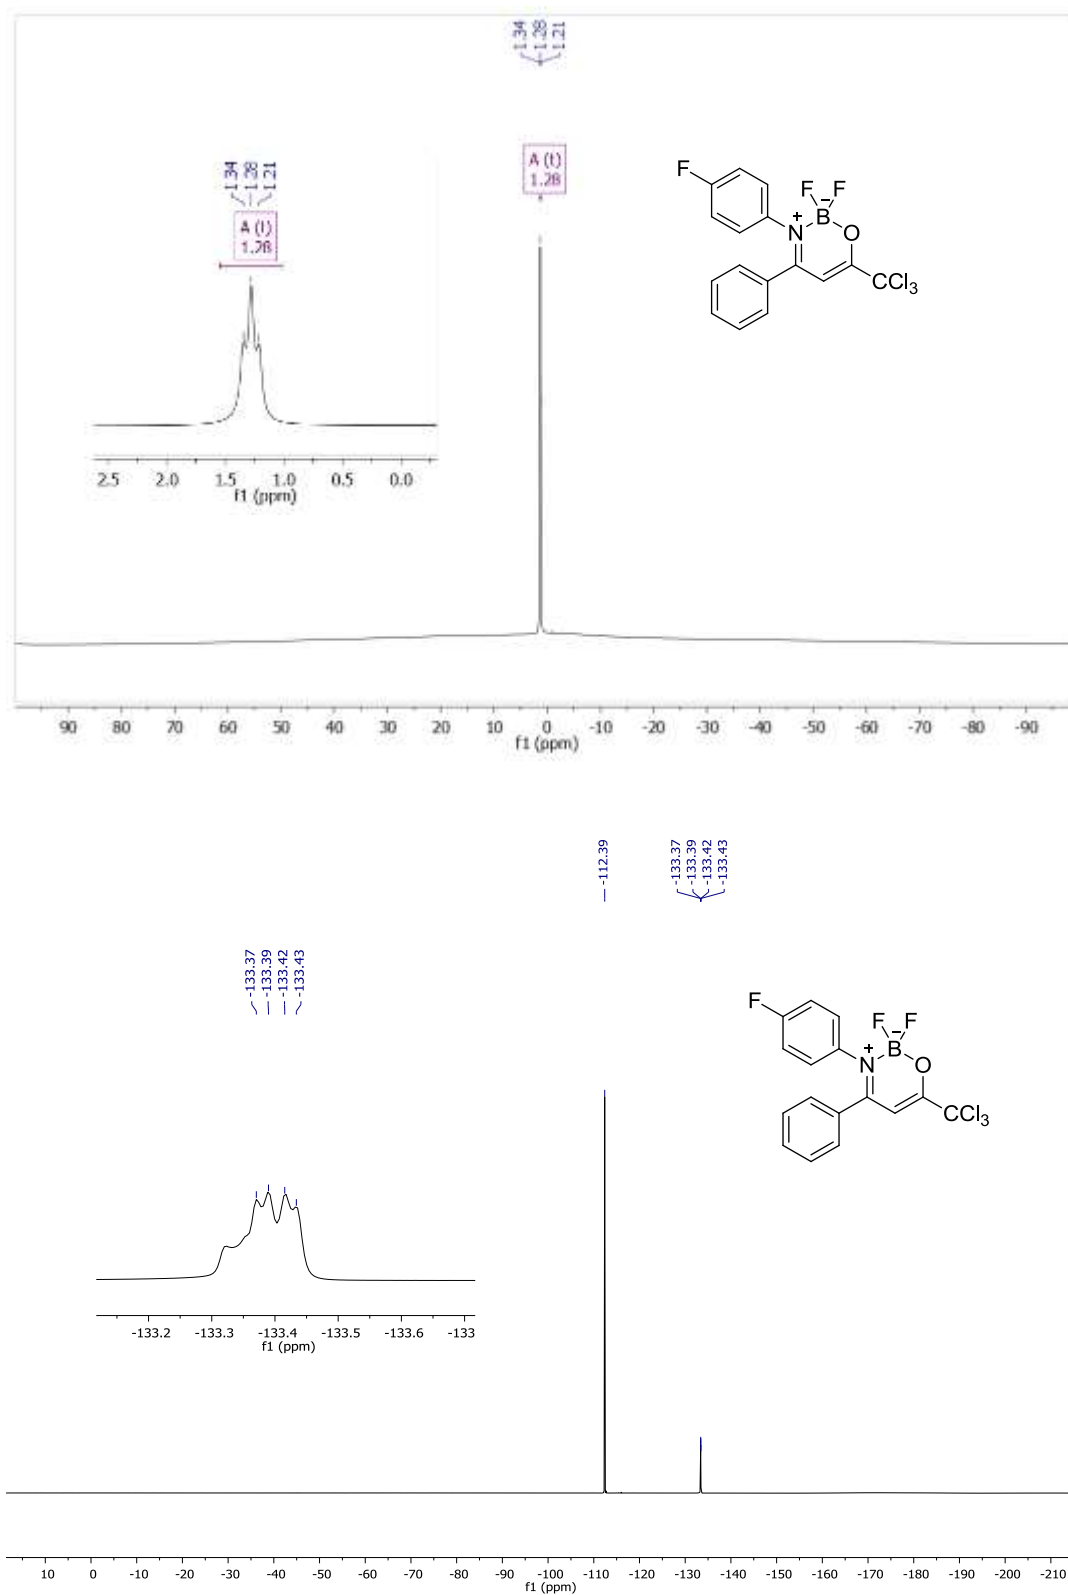

**Figure S24.** <sup>11</sup>B- and <sup>19</sup>F-NMR in CDCl<sub>3</sub> at 193 and 565 MHz, respectively of compound **6g**.

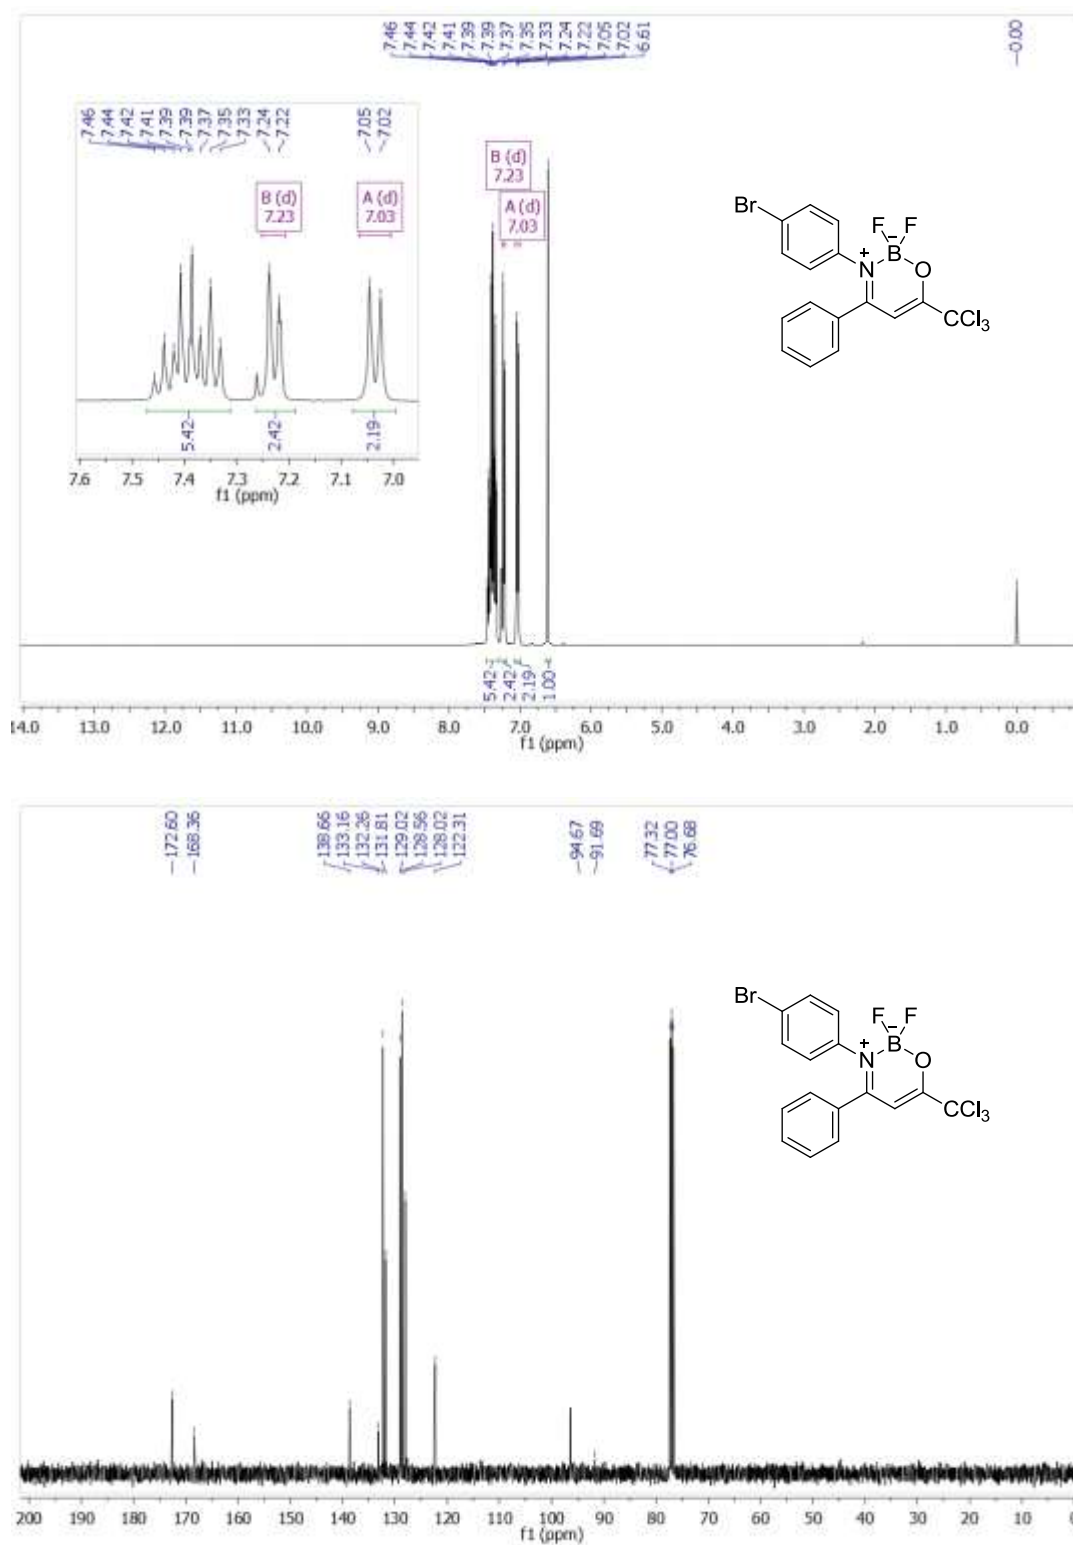

**Figure S25.** <sup>1</sup>H- and <sup>13</sup>C-NMR in CDCl<sub>3</sub> at 400 and 101 MHz, respectively of compound **6h**.

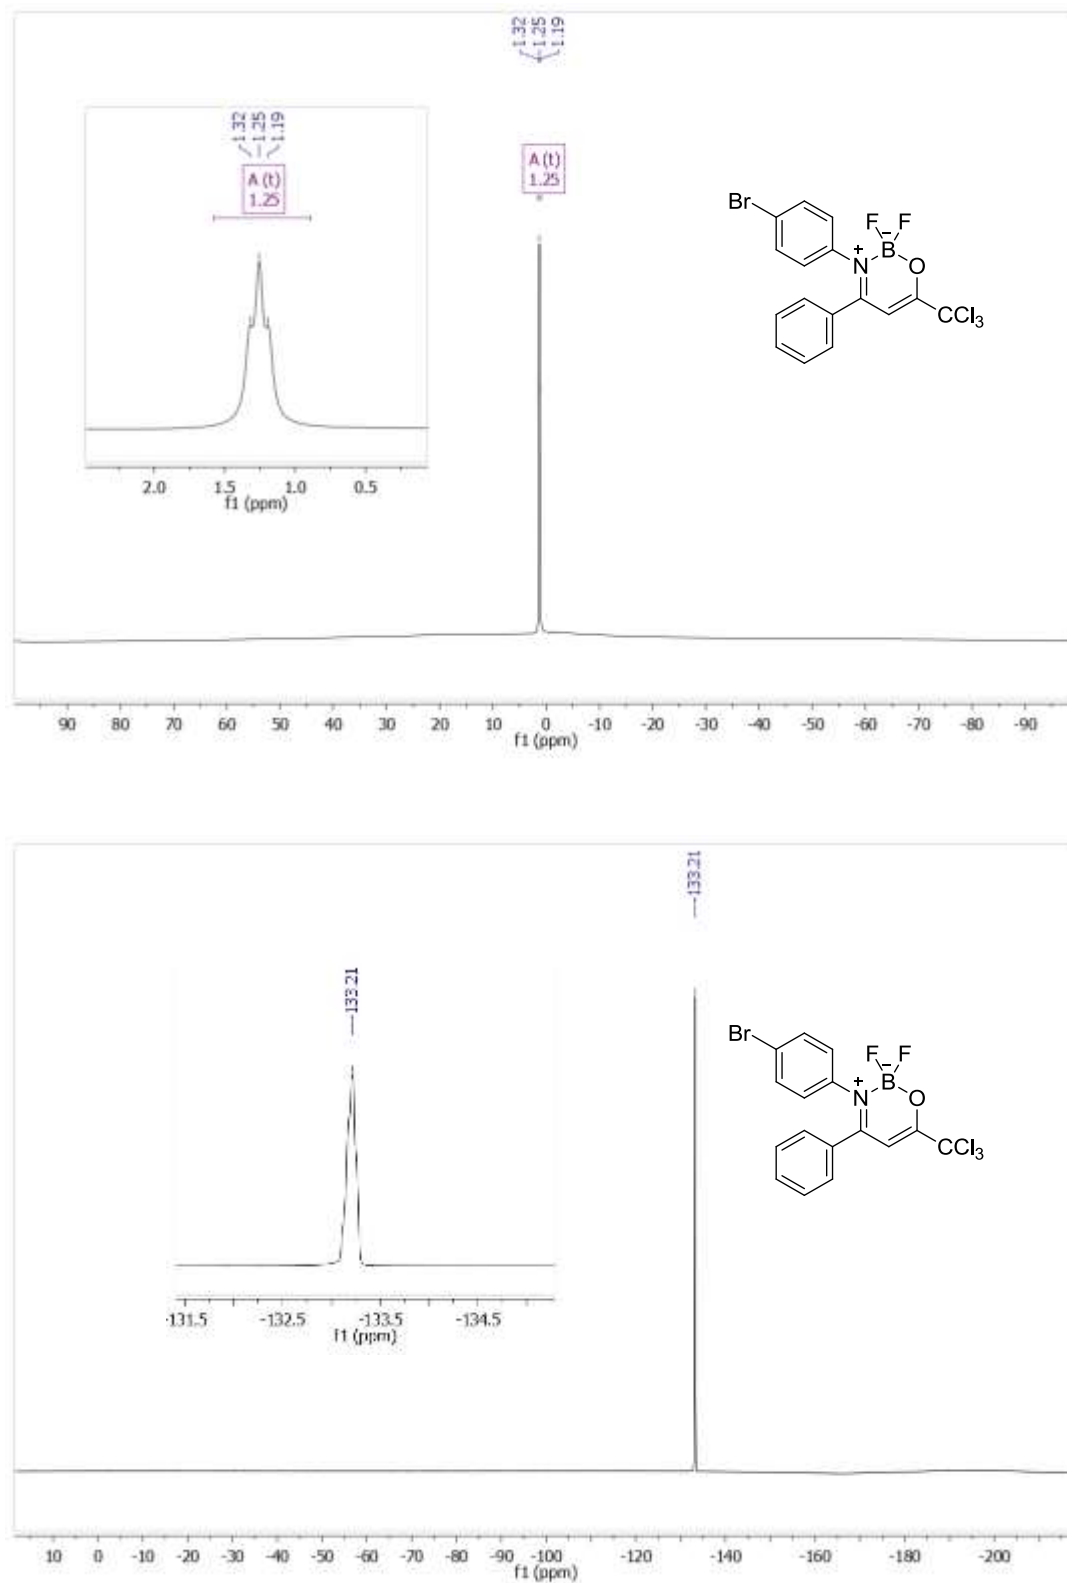

**Figure S26.**  $^{11}\text{B}$ - and  $^{19}\text{F}$ -NMR in  $\text{CDCl}_3$  at 193 and 565 MHz, respectively of compound **6h**.

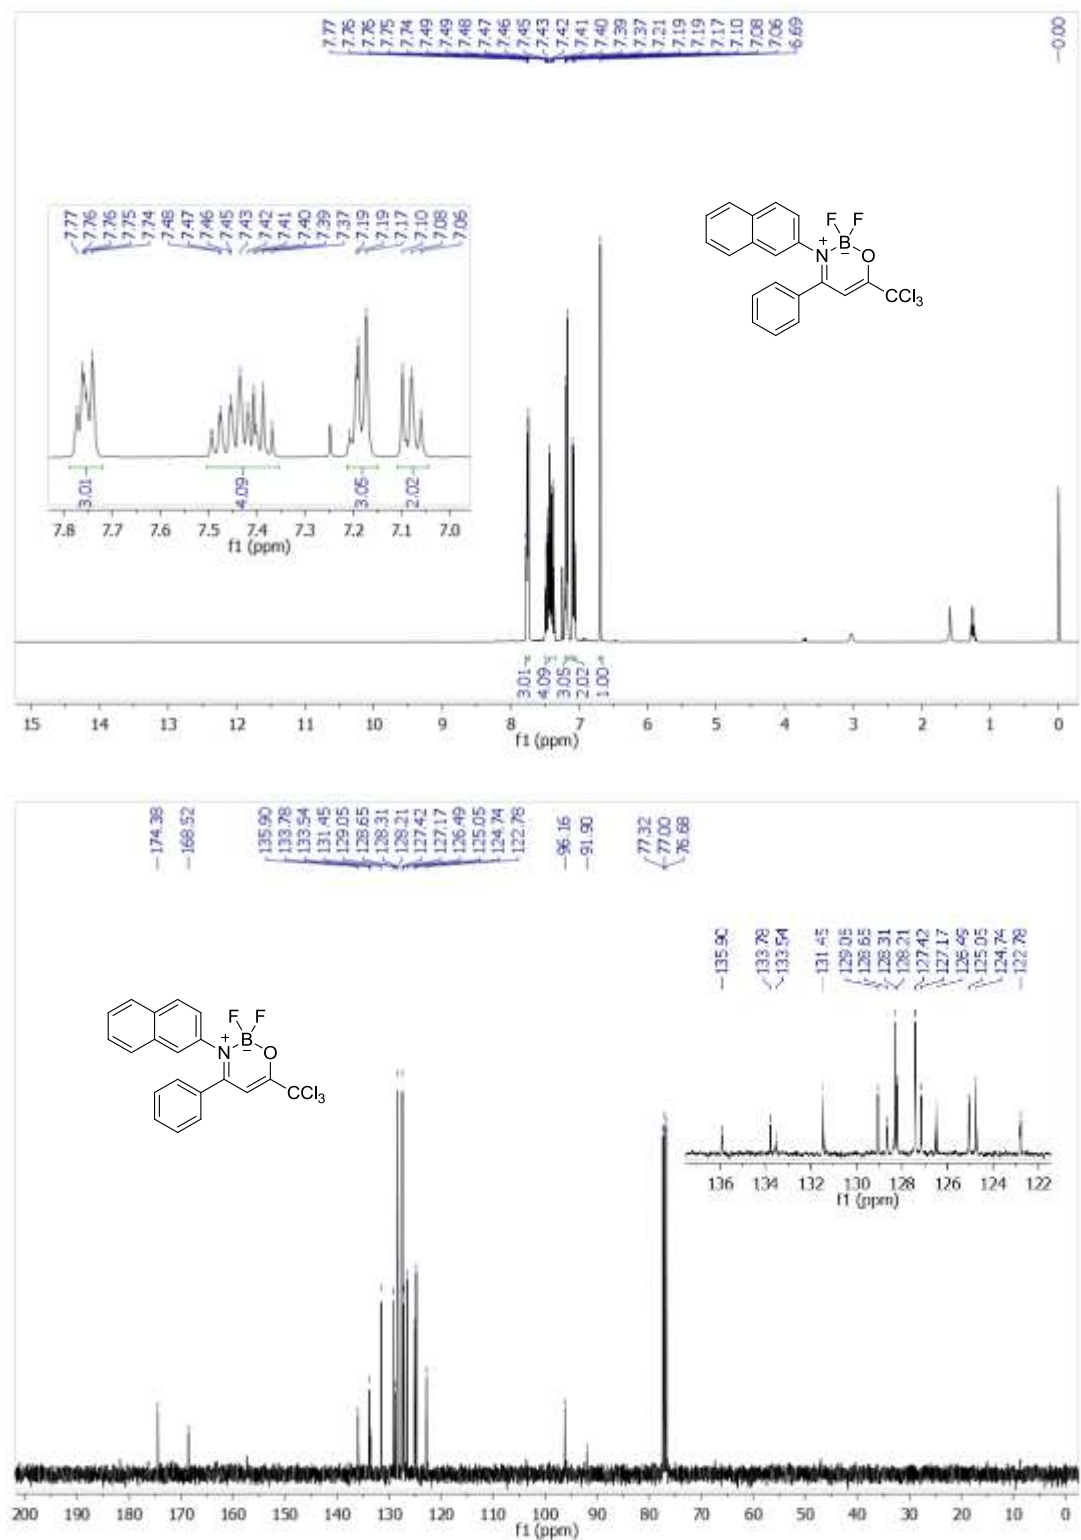

**Figure S27.** <sup>1</sup>H- and <sup>13</sup>C-NMR in CDCl<sub>3</sub> at 400 and 101 MHz respectively of compound **6i**.

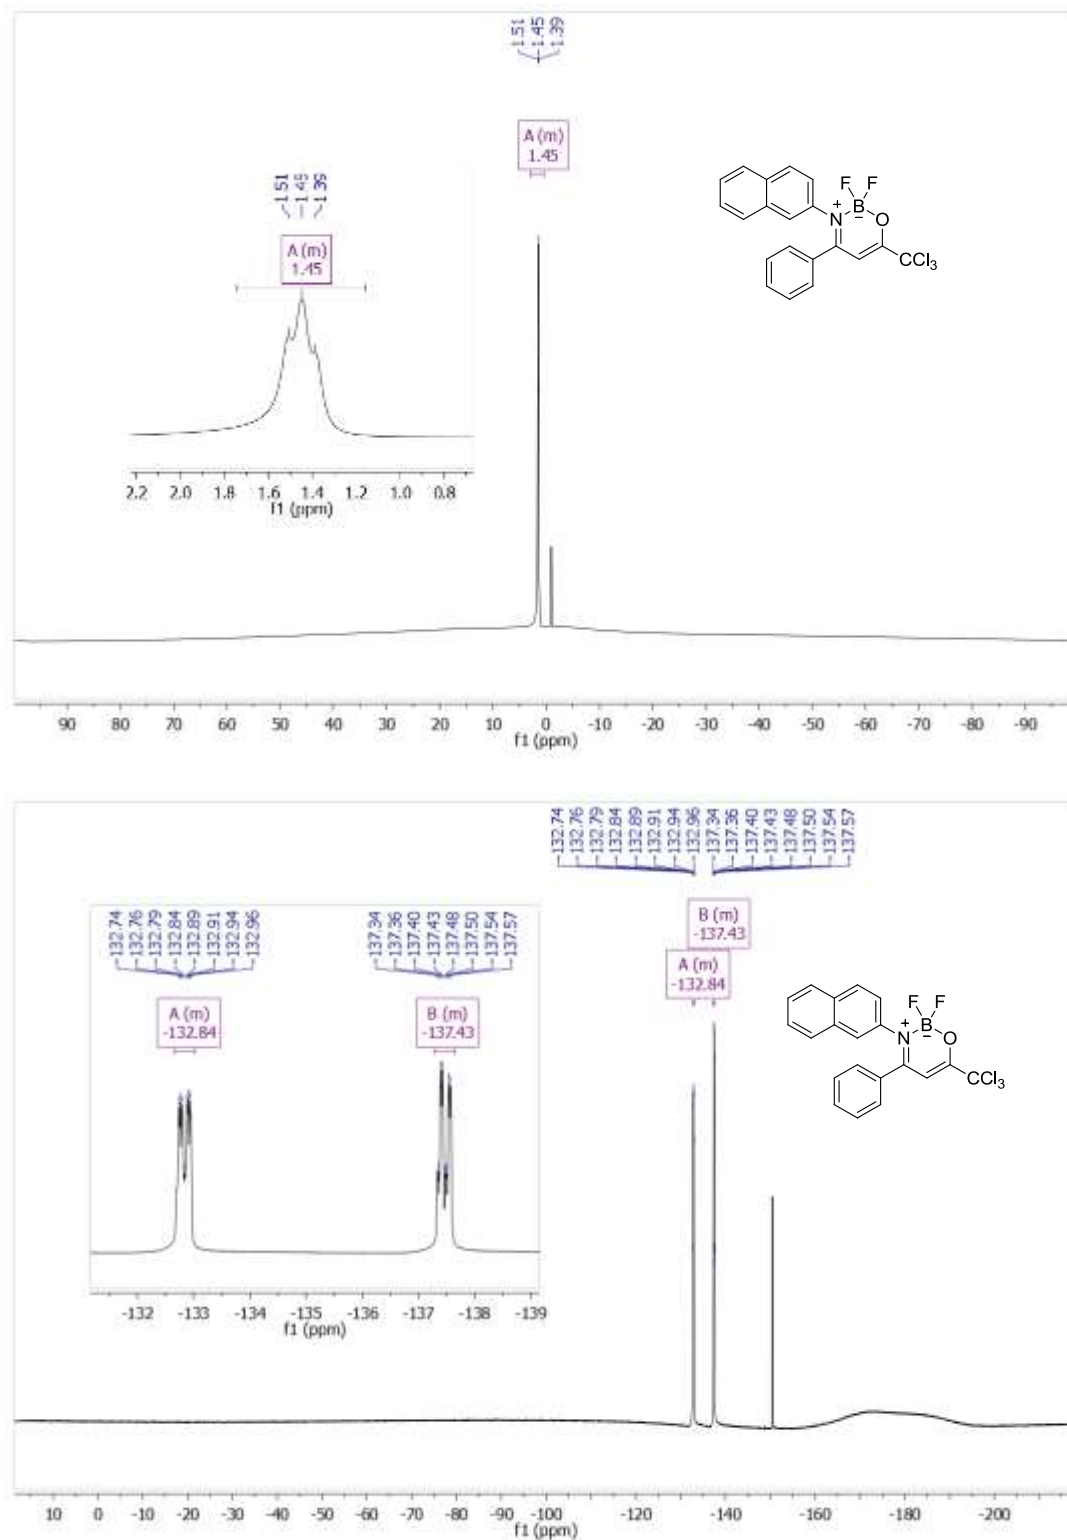

**Figure S28.** <sup>11</sup>B- and <sup>19</sup>F-NMR in CDCl<sub>3</sub> at 193 and 565 MHz respectively of compound **6i**.

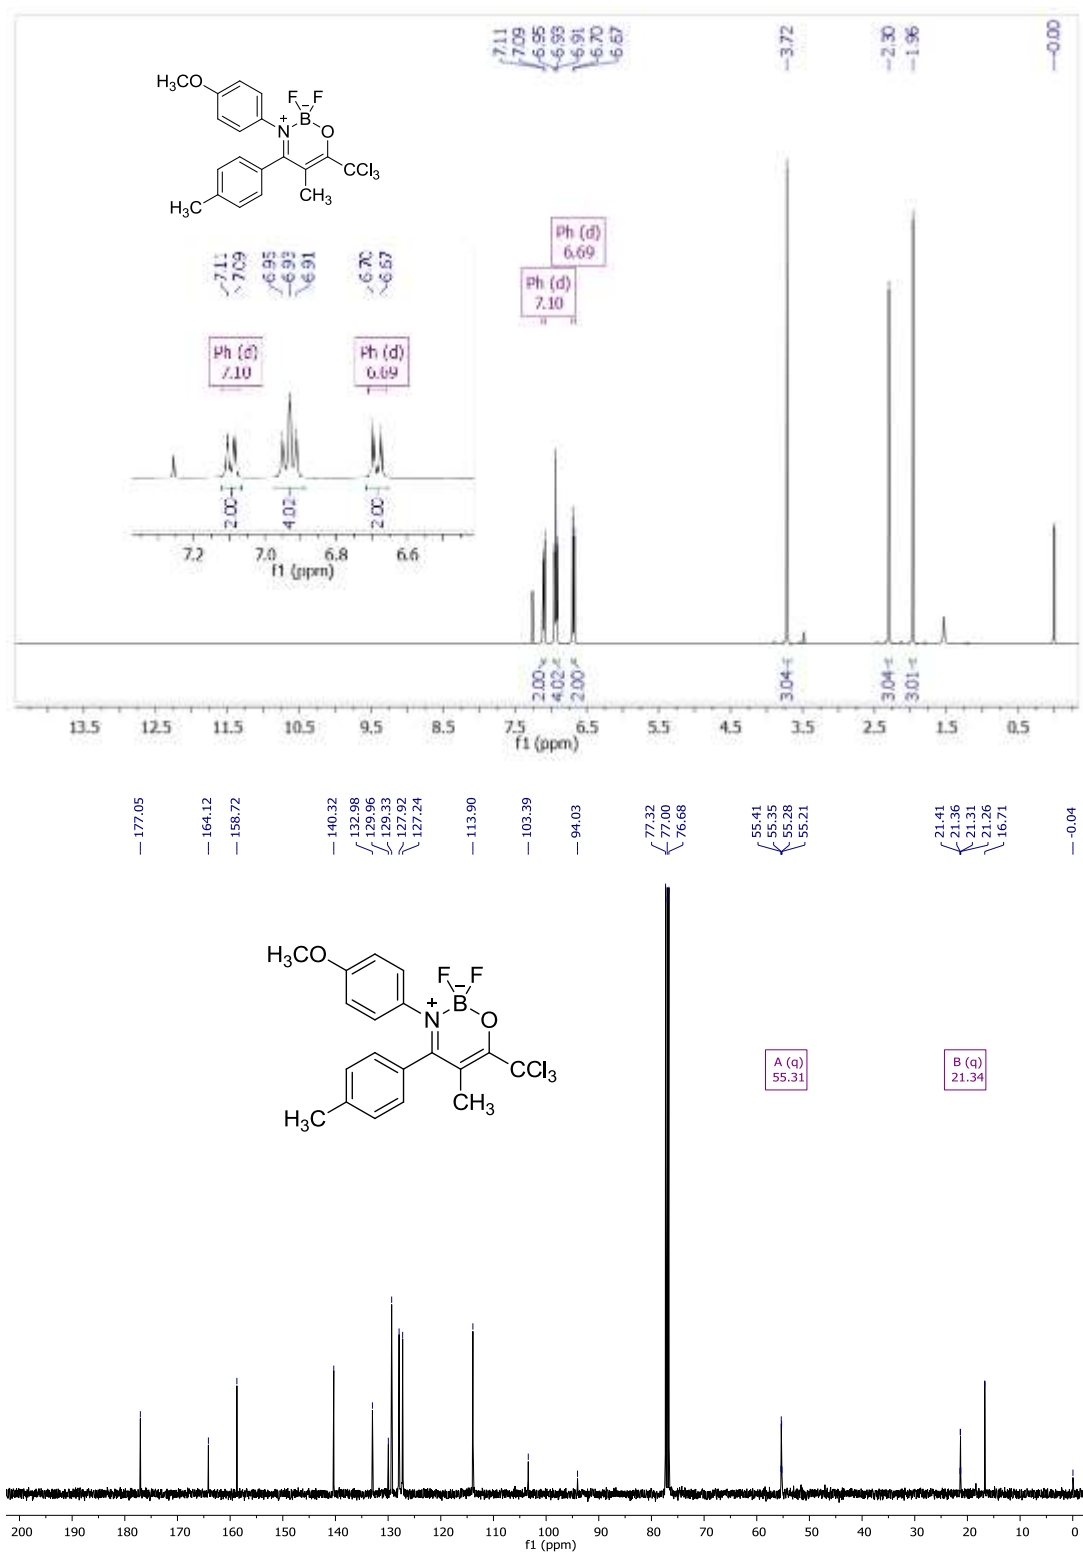

**Figure S29.** <sup>1</sup>H- and <sup>13</sup>C-NMR in CDCl<sub>3</sub> at 400 and 101 MHz, respectively of compound 7e.

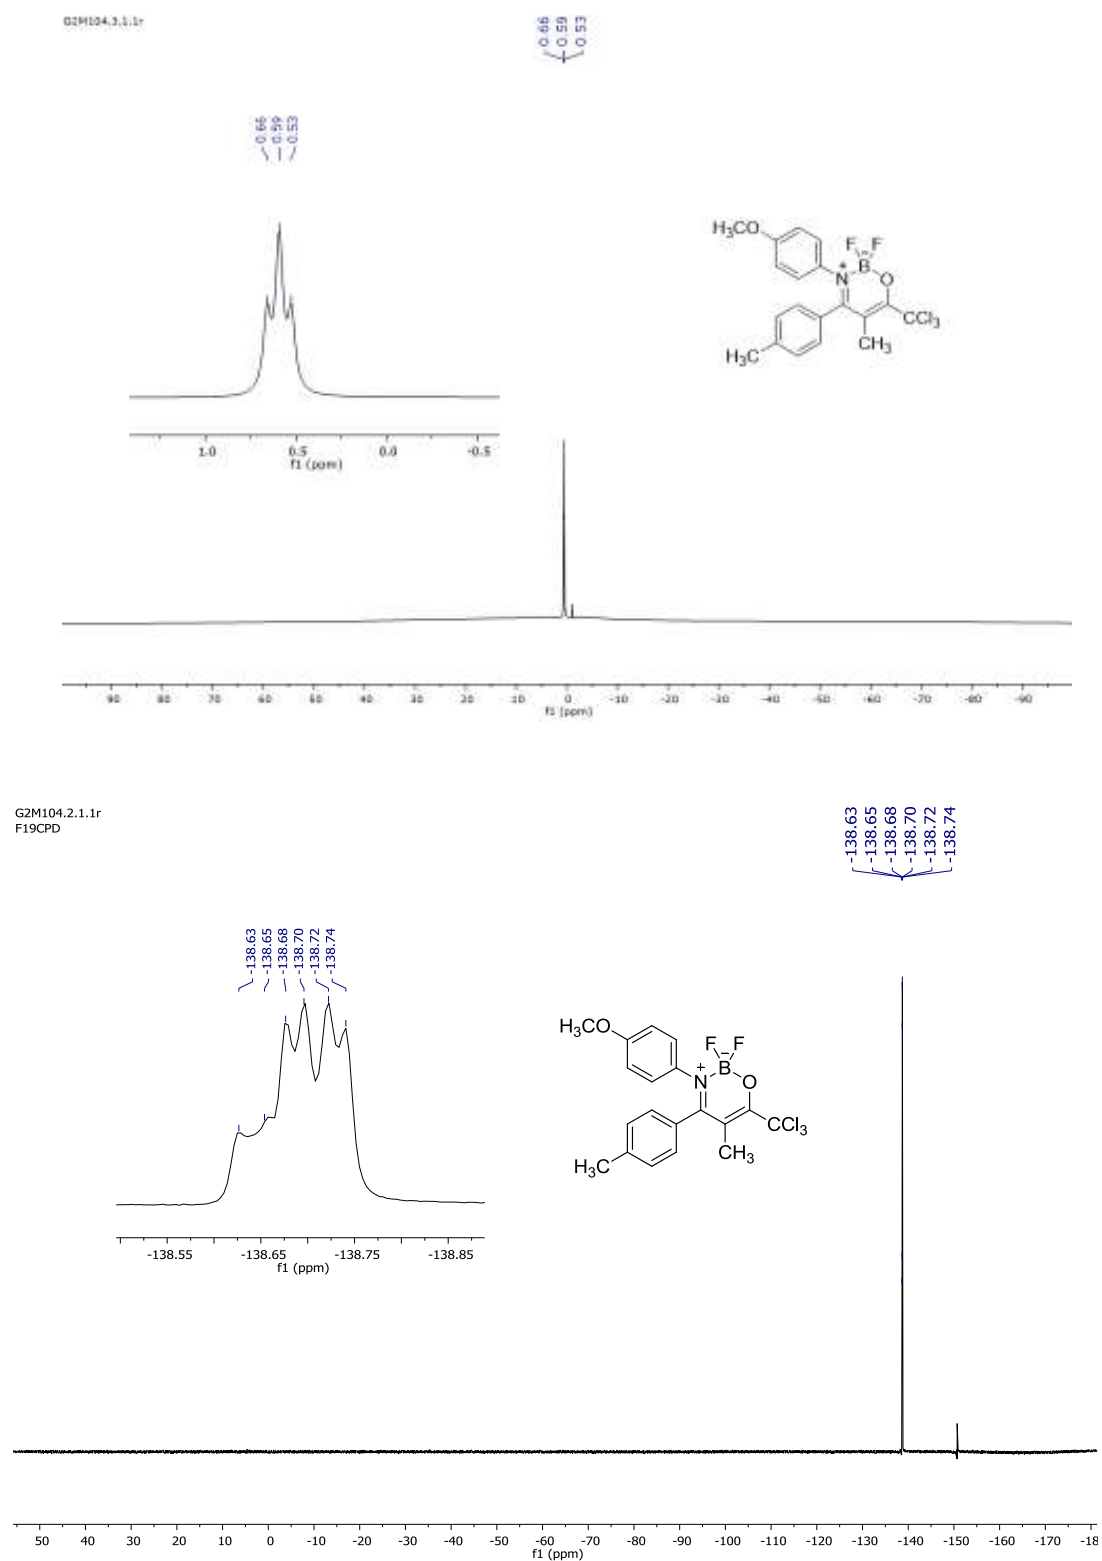

**Figure S30.**  $^{11}\text{B}$ - and  $^{19}\text{F}$ -NMR in  $\text{CDCl}_3$  at 193 and 565 MHz, respectively of compound **7e**.



## 2. HMRS spectra of compounds 4c, 4d, 4e and 4g.

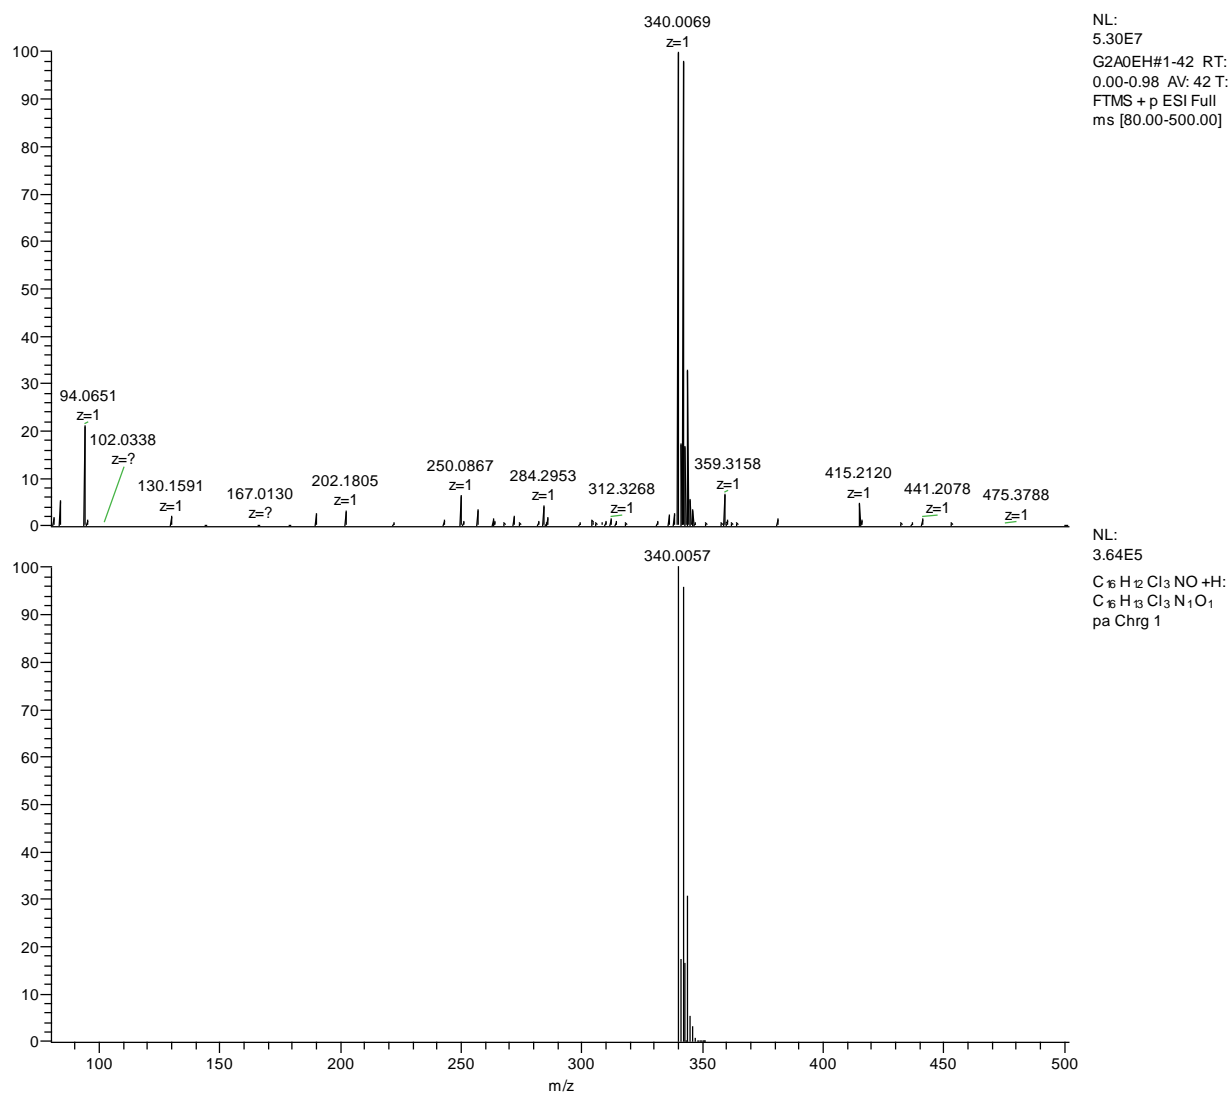

**Figure S31.** HRMS of compound **4c**.

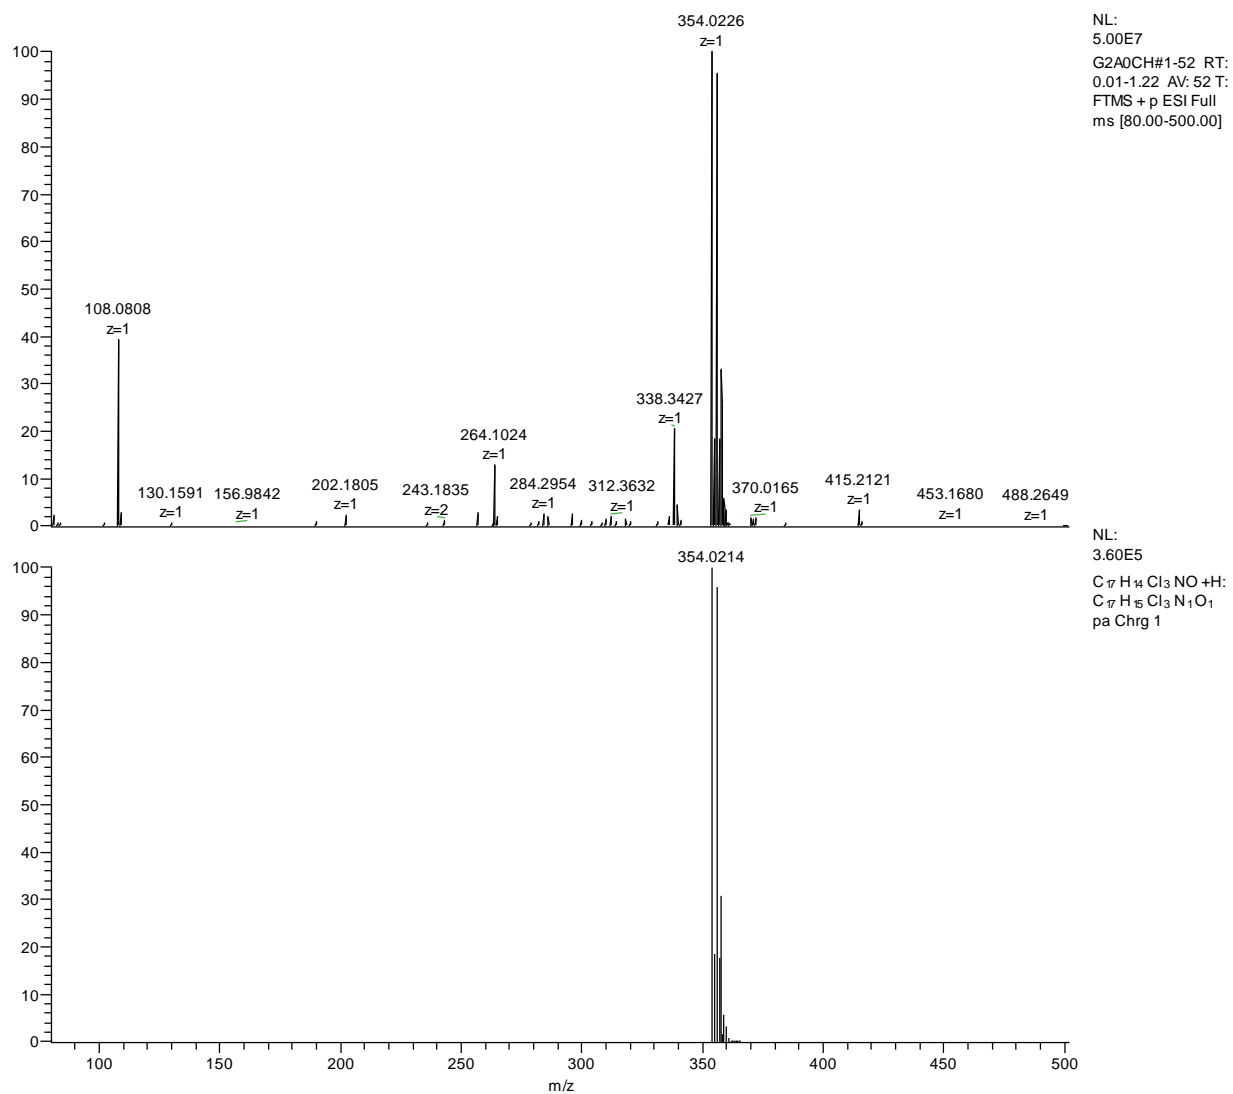

**Figure S32.** HRMS of compound **4d**.

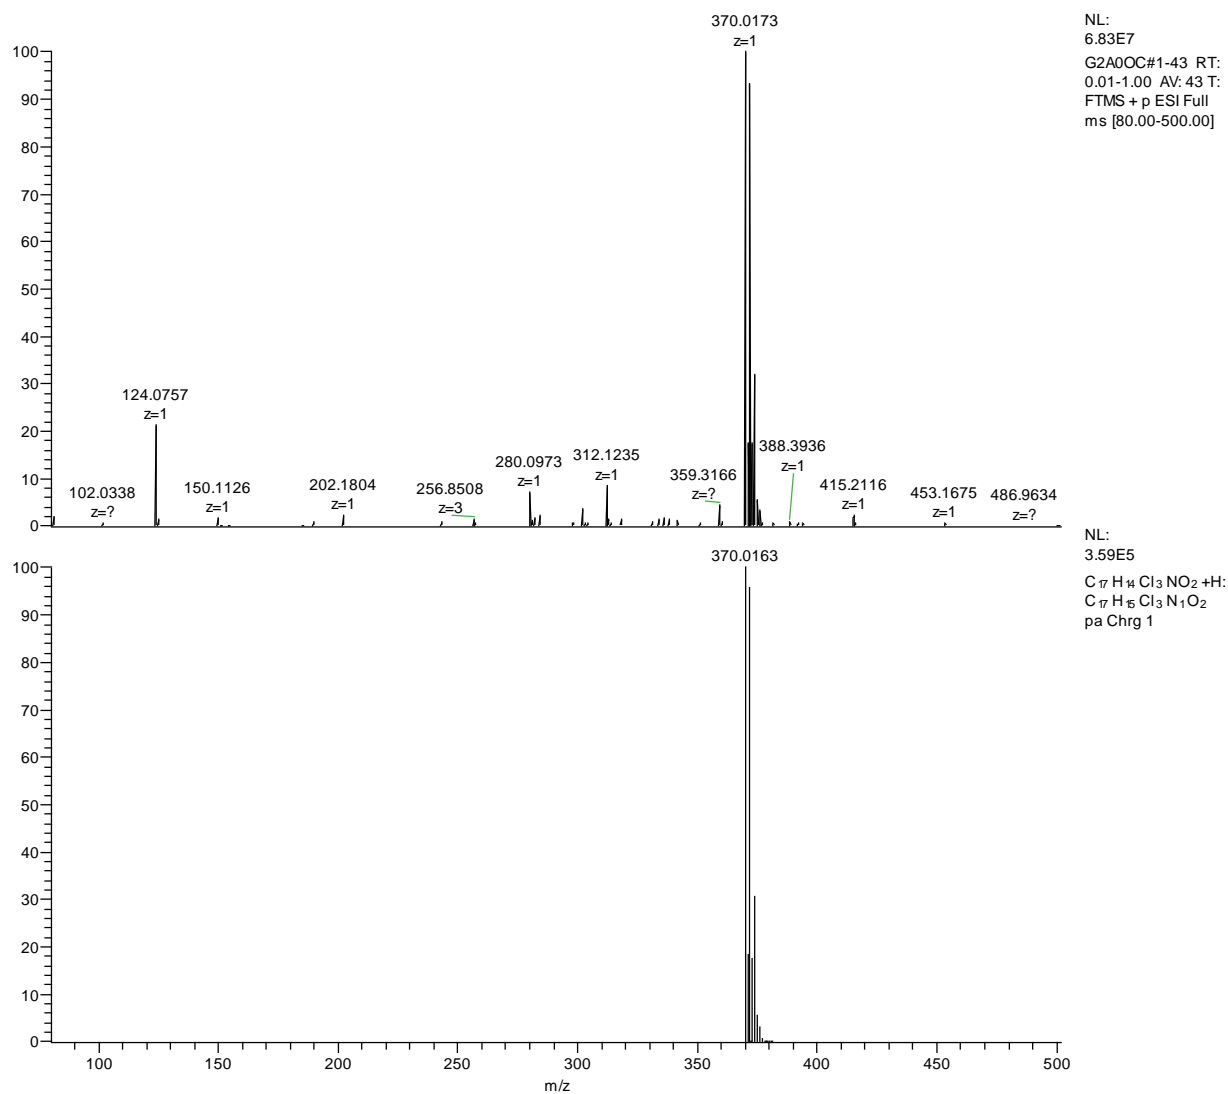

**Figure S33.** HRMS of compound **4e**.

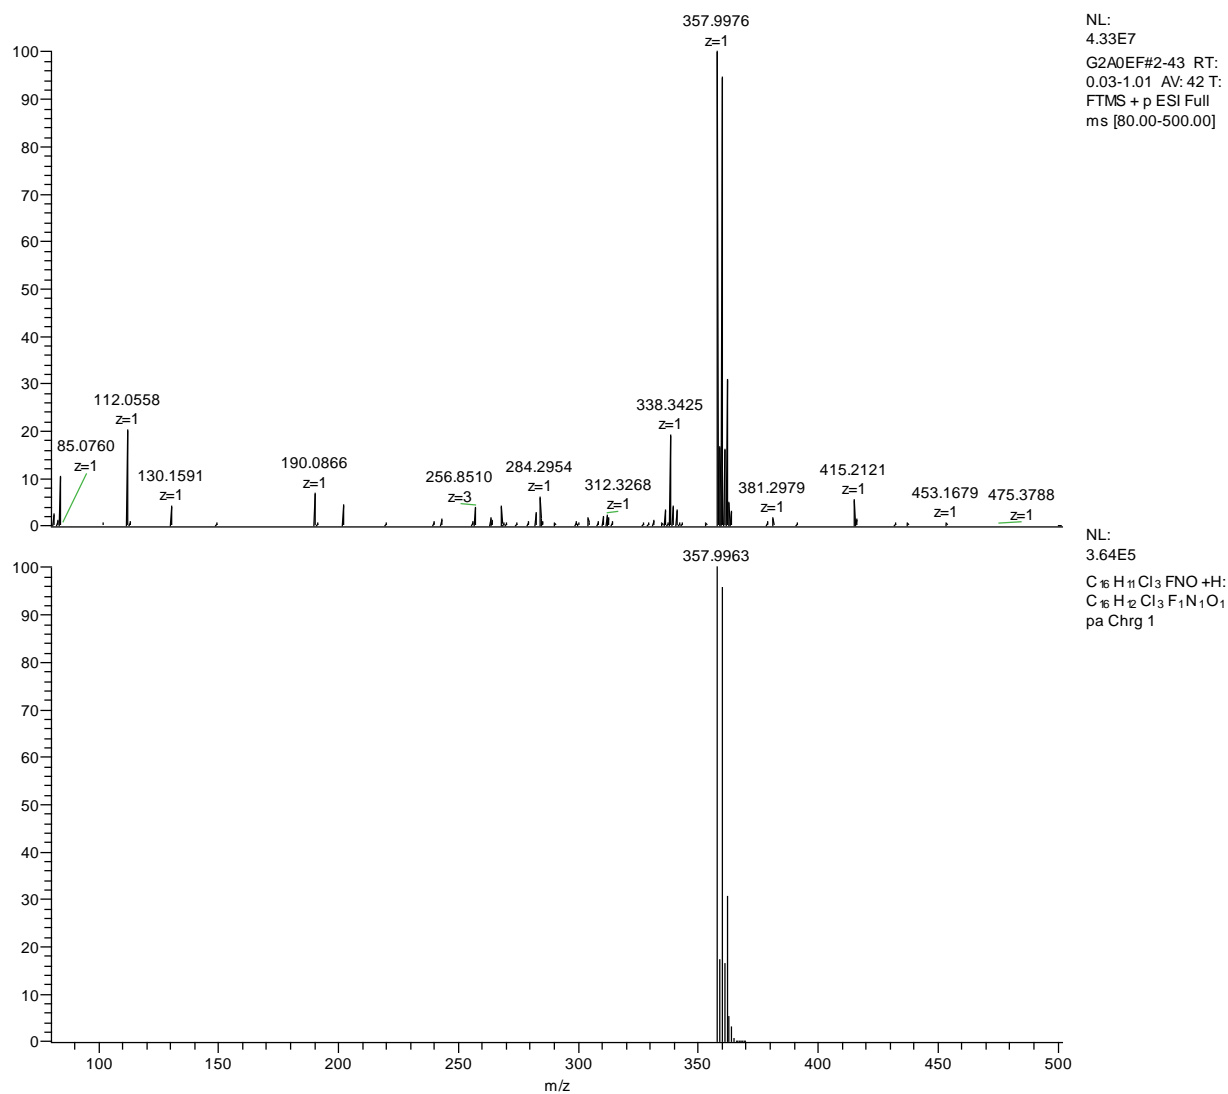

**Figure S34.** HRMS of compound **4g**.

### 3. Single Crystal X-Ray Data of compounds 4g and 6e.

#### Single Crystal X-Ray Data of compound 4g.

##### checkCIF/PLATON report

You have not supplied any structure factors. As a result the full set of tests cannot be run.

THIS REPORT IS FOR GUIDANCE ONLY. IF USED AS PART OF A REVIEW PROCEDURE FOR PUBLICATION, IT SHOULD NOT REPLACE THE EXPERTISE OF AN EXPERIENCED CRYSTALLOGRAPHIC REFEREE.

No syntax errors found. [CIF dictionary](#) [Interpreting this report](#)

##### Datablock: I

---

Bond precision: C-C = 0.0049 Å      Wavelength=1.54178

Cell:            a=5.9888(8)            b=11.5229(14)            c=12.3545(15)  
                  alpha=110.229(4)        beta=99.803(4)        gamma=93.479(4)  
Temperature: 296 K

|                        | Calculated        | Reported          |
|------------------------|-------------------|-------------------|
| Volume                 | 781.68(17)        | 781.68(17)        |
| Space group            | P -1              | P-1               |
| Hall group             | -P 1              | -P1               |
| Moiety formula         | C16 H11 Cl3 F N O | C16 H11 Cl3 F N O |
| Sum formula            | C16 H11 Cl3 F N O | C16 H11 Cl3 F N O |
| Mr                     | 358.61            | 358.61            |
| Dx, g cm <sup>-3</sup> | 1.524             | 1.524             |
| Z                      | 2                 | 2                 |
| Mu (mm <sup>-1</sup> ) | 5.409             | 5.409             |
| F000                   | 364.0             | 364.0             |
| F000'                  | 367.06            |                   |
| h, k, lmax             | 7, 13, 14         | 7, 13, 14         |
| Nref                   | 2887              | 2712              |
| Tmin, Tmax             | 0.199, 0.399      | 0.261, 0.460      |
| Tmin'                  | 0.127             |                   |

Correction method= # Reported T Limits: Tmin=0.261 Tmax=0.460  
AbsCorr = GAUSSIAN

Data completeness= 0.939      Theta(max)= 68.480

R(reflections)= 0.0600( 2487)      wR2(reflections)= 0.1757( 2712)

S = 1.095      Npar= 199

---

The following ALERTS were generated. Each ALERT has the format  
**test-name\_ALERT\_alert-type\_alert-level.**  
Click on the hyperlinks for more details of the test.

---

**Alert level C**

**ABSTV02 ALERT 1 C** An \_exptl\_absorpt\_correction\_type has been given without a literature citation. This should be contained in the \_exptl\_absorpt\_process\_details field.  
Absorption correction given as gaussian

**DIFMXD2 ALERT 1 C** The maximum difference density is > 0.1\*ZMAX\*0.75  
The relevant atom site should be identified.

**HYDTR01 ALERT 1 C** The hydrogen treatment should only be one of the following keywords

- \* refall
- \* refxyz
- \* refU
- \* noref
- \* undef
- \* constr
- \* none
- \* mixed
- \* hetero
- \* heteroxyz
- \* heteroU
- \* heteronoref
- \* hetero-mixed
- \* heteroxyz-mixed
- \* heteroU-mixed
- \* heteronoref-mixed

Hydrogen treatment given as constr

**PLAT028 ALERT 3 C** \_diffn\_measured\_fraction\_theta\_max Value Low .. 0.939 Why?

**PLAT094 ALERT 2 C** Ratio of Maximum / Minimum Residual Density .... 2.58 Report

**PLAT097 ALERT 2 C** Large Reported Max. (Positive) Residual Density 1.30 eA-3

**PLAT242 ALERT 2 C** Low 'MainMol' Ueq as Compared to Neighbors of C1 Check

**PLAT334 ALERT 2 C** Small Aver. Benzene C-C Dist C6 -C7' 1.37 Ang.

**PLAT340 ALERT 3 C** Low Bond Precision on C-C Bonds ..... 0.00487 Ang.

---

**Alert level G**

**PLAT005 ALERT 5 G** No Embedded Refinement Details Found in the CIF Please Do !

**PLAT007 ALERT 5 G** Number of Unrefined Donor-H Atoms ..... 1 Report

**PLAT019 ALERT 1 G** \_diffn\_measured\_fraction\_theta\_full/\*\_max < 1.0 0.838 Report

**PLAT154 ALERT 1 G** The s.u.'s on the Cell Angles are Equal ..(Note) 0.004 Degree

---

0 **ALERT level A** = Most likely a serious problem - resolve or explain

0 **ALERT level B** = A potentially serious problem, consider carefully

0 **ALERT level C** = Check. Ensure it is not caused by an omission or oversight

4 **ALERT level G** = General information/check it is not something unexpected

  

5 ALERT type 1 CIF construction/syntax error, inconsistent or missing data

4 ALERT type 2 Indicator that the structure model may be wrong or deficient

2 ALERT type 3 Indicator that the structure quality may be low

0 ALERT type 4 Improvement, methodology, query or suggestion

2 ALERT type 5 Informative message, check

---

## checkCIF publication errors

---

#### Alert level A

|                          |                                                                               |
|--------------------------|-------------------------------------------------------------------------------|
| <b>PUBL006 ALERT 1 A</b> | _publ_requested_journal is missing<br>e.g. 'Acta Crystallographica Section C' |
| <b>PUBL008 ALERT 1 A</b> | _publ_section_title is missing. Title of paper.                               |
| <b>PUBL009 ALERT 1 A</b> | _publ_author_name is missing. List of author(s) name(s).                      |
| <b>PUBL010 ALERT 1 A</b> | _publ_author_address is missing. Author(s) address(es).                       |
| <b>PUBL012 ALERT 1 A</b> | _publ_section_abstract is missing.<br>Abstract of paper in English.           |

---

5 **ALERT level A** = Data missing that is essential or data in wrong format  
0 **ALERT level G** = General alerts. Data that may be required is missing

---

#### Publication of your CIF

You should attempt to resolve as many as possible of the alerts in all categories. Often the minor alerts point to easily fixed oversights, errors and omissions in your CIF or refinement strategy, so attention to these fine details can be worthwhile. In order to resolve some of the more serious problems it may be necessary to carry out additional measurements or structure refinements. However, the nature of your study may justify the reported deviations from journal submission requirements and the more serious of these should be commented upon in the discussion or experimental section of a paper or in the "special\_details" fields of the CIF. *checkCIF* was carefully designed to identify outliers and unusual parameters, but every test has its limitations and alerts that are not important in a particular case may appear. Conversely, the absence of alerts does not guarantee there are no aspects of the results needing attention. It is up to the individual to critically assess their own results and, if necessary, seek expert advice.

If level A alerts remain, which you believe to be justified deviations, and you intend to submit this CIF for publication in a journal, you should additionally insert an explanation in your CIF using the Validation Reply Form (VRF) below. This will allow your explanation to be considered as part of the review process.

#### Validation response form

Please find below a validation response form (VRF) that can be filled in and pasted into your CIF.

```
# start Validation Reply Form
_vrf_PUBL006_GLOBAL
{
PROBLEM: _publ_requested_journal is missing
RESPONSE: ...
}
_vrf_PUBL008_GLOBAL
{
PROBLEM: _publ_section_title is missing. Title of paper.
RESPONSE: ...
}
_vrf_PUBL009_GLOBAL
{
PROBLEM: _publ_author_name is missing. List of author(s) name(s).
RESPONSE: ...
}
_vrf_PUBL010_GLOBAL
```

```

:
PROBLEM: _publ_author_address is missing. Author(s) address(es).
RESPONSE: ...
:
_vrf_PUBL012_GLOBAL
:
PROBLEM: _publ_section_abstract is missing.
RESPONSE: ...
:
# end Validation Reply Form

```

If you wish to submit your CIF for publication in Acta Crystallographica Section C or E, you should upload your CIF via [the web](#). If you wish to submit your CIF for publication in IUCrData you should upload your CIF via [the web](#). If your CIF is to form part of a submission to another IUCr journal, you will be asked, either during electronic [submission](#) or by the Co-editor handling your paper, to upload your CIF via our web site.

---

**PLATON version of 09/11/2017; check.def file version of 08/11/2017**

Database: f - clipnot plus

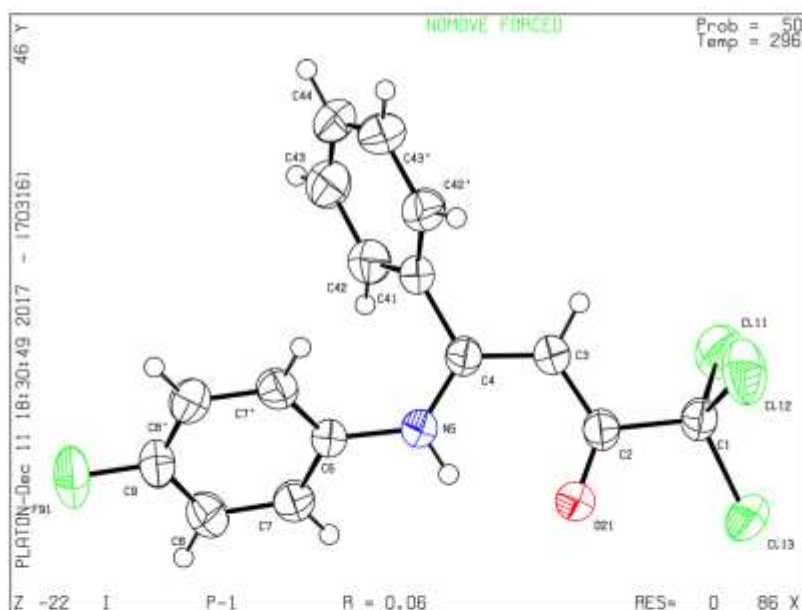



## Single Crystal X-Ray Data of compound 6e.

### checkCIF/PLATON report

You have not supplied any structure factors. As a result the full set of tests cannot be run.

THIS REPORT IS FOR GUIDANCE ONLY. IF USED AS PART OF A REVIEW PROCEDURE FOR PUBLICATION, IT SHOULD NOT REPLACE THE EXPERTISE OF AN EXPERIENCED CRYSTALLOGRAPHIC REFEREE.

No syntax errors found. [CIF dictionary](#) [Interpreting this report](#)

### Datablock: I

---

|                 |                |                           |
|-----------------|----------------|---------------------------|
| Bond precision: | C-C = 0.0033 Å | Wavelength=1.54178        |
| Cell:           | a=5.7998(2)    | b=16.0750(4) c=19.7847(5) |
|                 | alpha=90       | beta=90 gamma=90          |
| Temperature:    | 293 K          |                           |

  

|                | Calculated            | Reported              |
|----------------|-----------------------|-----------------------|
| Volume         | 1844.56(9)            | 1844.56(9)            |
| Space group    | P 21 21 21            | P212121               |
| Hall group     | P 2ac 2ab             | P2ac2ab               |
| Moiety formula | C17 H13 B Cl3 F2 N O2 | C17 H13 B Cl3 F2 N O2 |
| Sum formula    | C17 H13 B Cl3 F2 N O2 | C17 H13 B Cl3 F2 N O2 |
| Mr             | 418.44                | 418.44                |
| Dx, g cm-3     | 1.507                 | 1.507                 |
| Z              | 4                     | 4                     |
| Mu (mm-1)      | 4.787                 | 4.787                 |
| F000           | 848.0                 | 848.0                 |
| F000'          | 854.70                |                       |
| h, k, lmax     | 6, 19, 23             | 6, 19, 23             |
| Nref           | 3359[ 1964]           | 3232                  |
| Tmin, Tmax     | 0.352, 0.614          | 0.558, 0.753          |
| Tmin'          | 0.040                 |                       |

  

Correction method= # Reported T Limits: Tmin=0.558 Tmax=0.753  
AbsCorr = GAUSSIAN

  

Data completeness= 1.65/0.96      Theta(max)= 68.080

  

R(reflections)= 0.0290( 3154)      wR2(reflections)= 0.0784( 3232)

  

S = 1.054      Npar= 235

---

The following ALERTS were generated. Each ALERT has the format  
**test-name\_ALERT\_alert-type\_alert-level.**  
Click on the hyperlinks for more details of the test.

|                      |                                                                                                                                                                                                  |            |
|----------------------|--------------------------------------------------------------------------------------------------------------------------------------------------------------------------------------------------|------------|
| <b>Alert level C</b> |                                                                                                                                                                                                  |            |
| ARSTY02 ALERT 1 C    | An _exptl_absorpt_correction_type has been given without a literature citation. This should be contained in the _exptl_absorpt_process_details field.<br>Absorption correction given as gaussian |            |
| PLAT029 ALERT 3 G    | _diffrn_measured_fraction_theta_full value low .                                                                                                                                                 | 0.977 Note |
| PLAT241 ALERT 2 G    | High 'MainMol' Ueq as Compared to Neighbors of                                                                                                                                                   | 01 Check   |
| PLAT242 ALERT 2 G    | Low 'MainMol' Ueq as Compared to Neighbors of                                                                                                                                                    | 02 Check   |

|                      |                                                  |              |
|----------------------|--------------------------------------------------|--------------|
| <b>Alert level G</b> |                                                  |              |
| PLAT005 ALERT 5 G    | No Embedded Refinement Details found in the CIF  | Please Do !  |
| PLAT033 ALERT 4 G    | Flack x Value Deviates > 3.0 * sigma from Zero . | 0.056 Note   |
| PLAT067 ALERT 4 G    | Crystal Size Likely too Large for Beam Size .... | 0.64 mm      |
| PLAT159 ALERT 1 G    | Reported _cell_measurement_temperature ..... (K) | 293 Check    |
| PLAT200 ALERT 1 G    | Reported _diffrn_ambient_temperature ..... (K)   | 293 Check    |
| PLAT399 ALERT 2 G    | Deviating X-O-Y Angle from 120 Deg for O1        | 123.3 Degree |

- 0 ALERT level A = Most likely a serious problem - resolve or explain  
0 ALERT level B = A potentially serious problem, consider carefully  
4 ALERT level C = Check. Ensure it is not caused by an omission or oversight  
6 ALERT level G = General information/check it is not something unexpected
- 3 ALERT type 1 CIF construction/syntax error, inconsistent or missing data  
3 ALERT type 2 Indicator that the structure model may be wrong or deficient  
1 ALERT type 3 Indicator that the structure quality may be low  
2 ALERT type 4 Improvement, methodology, query or suggestion  
1 ALERT type 5 Informative message, check

## checkCIF publication errors

|                      |                                                                               |  |
|----------------------|-------------------------------------------------------------------------------|--|
| <b>Alert level A</b> |                                                                               |  |
| PUBLO06 ALERT 1 A    | _publ_requested_journal is missing<br>e.g. 'Acta Crystallographica Section C' |  |
| PUBLO08 ALERT 1 A    | _publ_section_title is missing. Title of paper.                               |  |
| PUBLO09 ALERT 1 A    | _publ_author_name is missing. List of author(s) name(s).                      |  |
| PUBLO10 ALERT 1 A    | _publ_author_address is missing. Author(s) address(es).                       |  |
| PUBLO12 ALERT 1 A    | _publ_section_abstract is missing.<br>Abstract of paper in English.           |  |

- 5 ALERT level A = Data missing that is essential or data in wrong format  
0 ALERT level G = General alerts. Data that may be required is missing

### Publication of your CIF

You should attempt to resolve as many as possible of the alerts in all categories. Often the minor alerts point to easily fixed oversights, errors and omissions in your CIF or refinement strategy, so attention to these fine details can be worthwhile. In order to resolve some of the more serious problems it may be necessary to carry out additional measurements or structure refinements. However, the nature of your study may justify the reported deviations from journal submission requirements and the more serious of these should be commented upon in the discussion or experimental section of a paper or in the "special\_details" fields of the CIF. *checkCIF* was carefully designed to identify outliers and unusual parameters, but every test has its limitations and alerts that are not important in a particular case may appear. Conversely, the absence of alerts does not guarantee there are no aspects of the results needing attention. It is up to the individual to critically assess their own results and, if necessary, seek expert advice.

If level A alerts remain, which you believe to be justified deviations, and you intend to submit this CIF for publication in a journal, you should additionally insert an explanation in your CIF using the Validation Reply Form (VRF) below. This will allow your explanation to be considered as part of the review process.

### Validation response form

Please find below a validation response form (VRF) that can be filled in and pasted into your CIF.

```
# start Validation Reply Form
_vrf_PUBL006_GLOBAL
/
PROBLEM: _publ_requested_journal is missing
RESPONSE: ...
/
_vrf_PUBL008_GLOBAL
/
PROBLEM: _publ_section_title is missing. Title of paper.
RESPONSE: ...
/
_vrf_PUBL009_GLOBAL
/
PROBLEM: _publ_author_name is missing. List of author(s) name(s).
RESPONSE: ...
/
_vrf_PUBL010_GLOBAL
/
PROBLEM: _publ_author_address is missing. Author(s) address(es).
RESPONSE: ...
/
_vrf_PUBL012_GLOBAL
/
PROBLEM: _publ_section_abstract is missing.
RESPONSE: ...
/
# end Validation Reply Form
```

If you wish to submit your CIF for publication in Acta Crystallographica Section C or E, you should upload your CIF via [the web](#). If you wish to submit your CIF for publication in IUCrData you should upload your CIF via [the web](#). If your CIF is to form part of a submission to another IUCr journal, you will be asked, either during electronic [submission](#) or by the Co-editor handling your paper, to upload your CIF via our web site.

PLATON version of 13/08/2017; check.def file version of 27/07/2017

Drawback 1 - clipend.plt

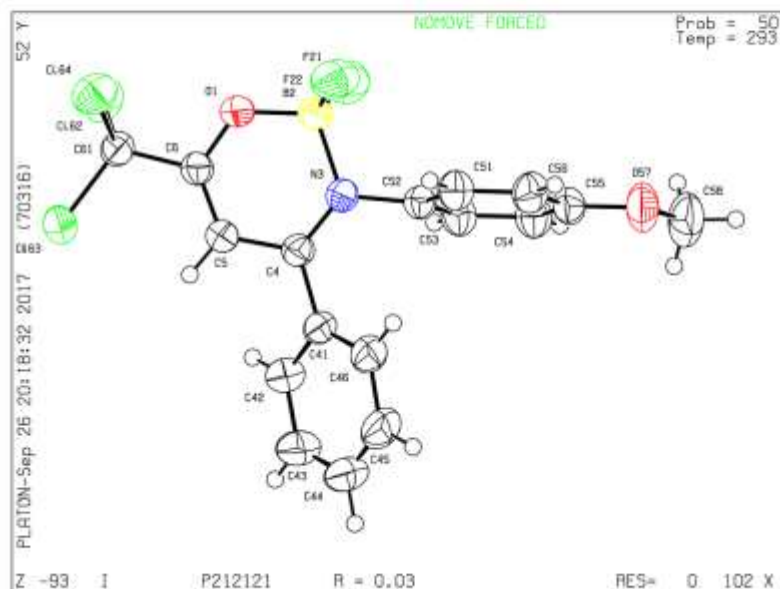

#### 4. UV-VIS Spectra for compounds 6a-i and 7e.

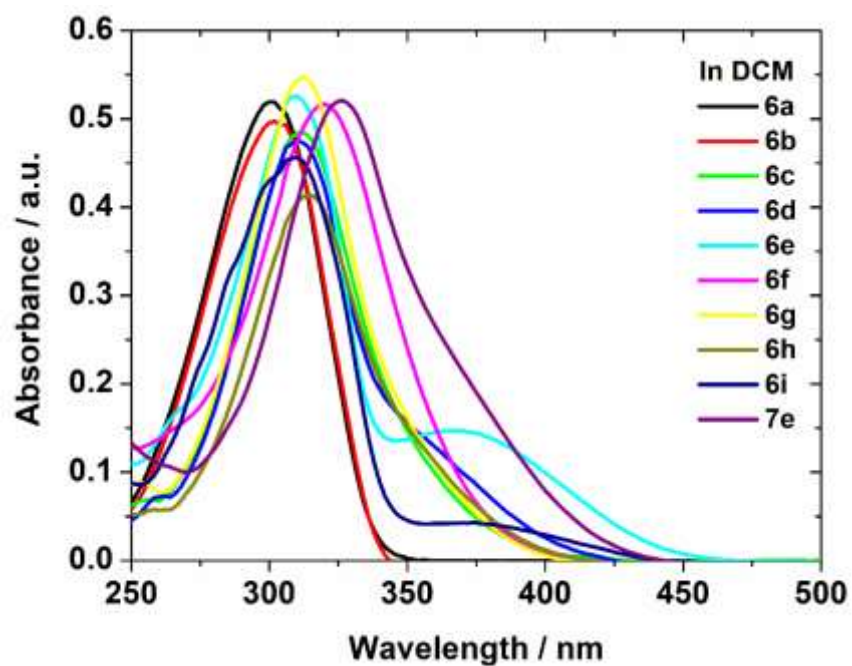

Figure S35. UV-Vis absorption spectra in DCM solution of boron complexes **6a-i** and **7e**.

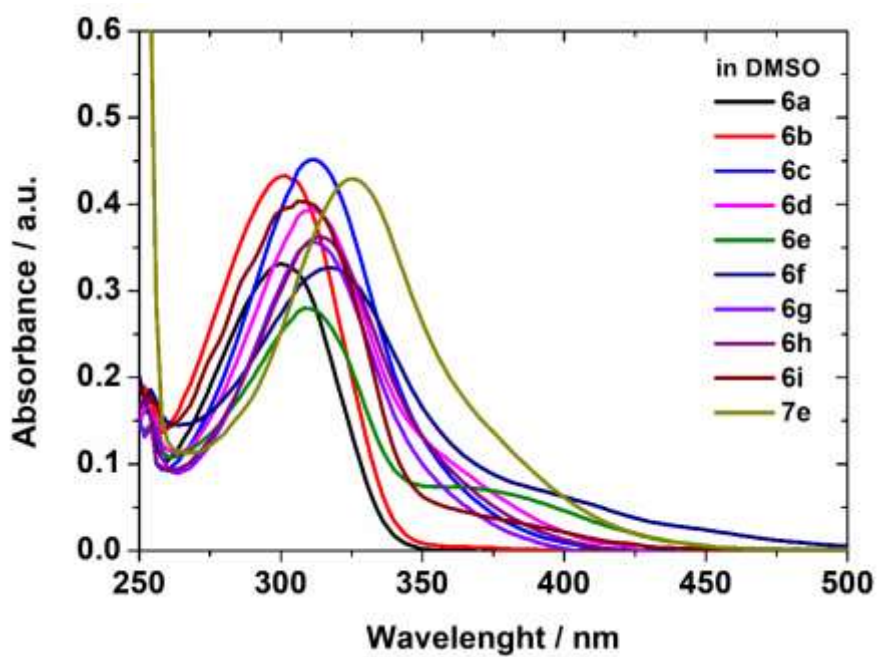

Figure S36. UV-Vis absorption spectra in DMSO solution of boron complexes **6a-i** and **7e**.

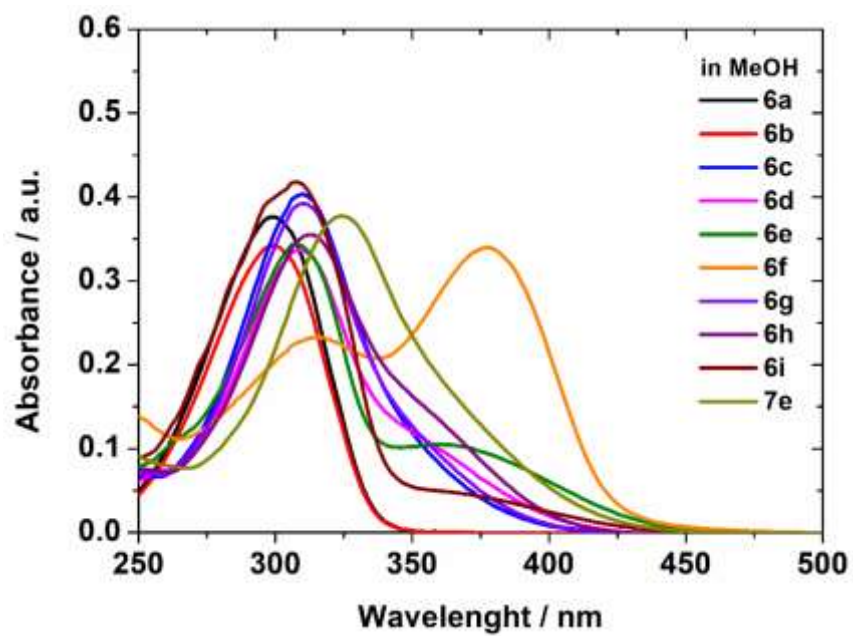

**Figure S37.** UV-Vis absorption spectra in MeOH solution of boron complexes **6a-i** and **7e**.

## 5. Steady-state emission fluorescence spectra

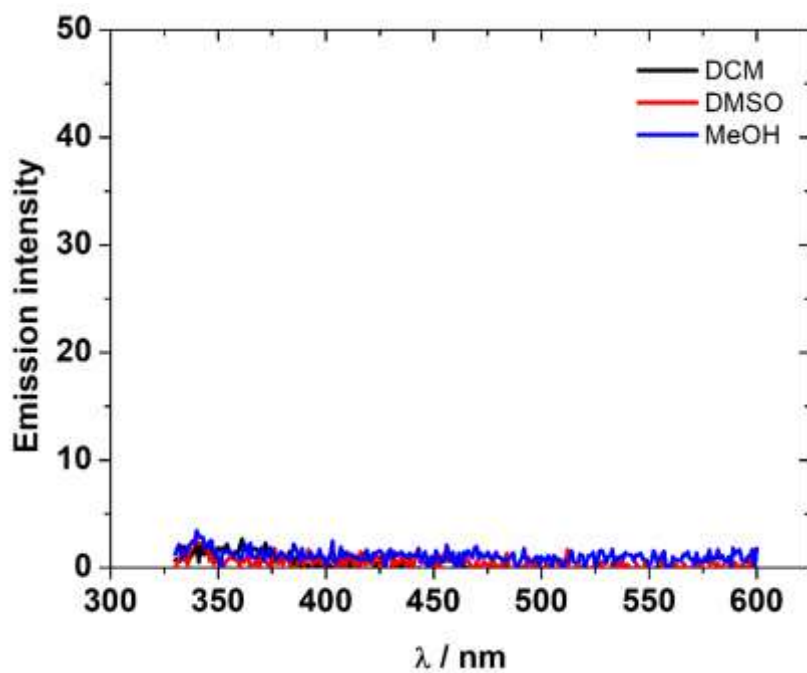

**Figure S38.** Comparative steady-state emission fluorescence spectra in solution of boron complex **6a**.

## 6. UV-VIS DNA titrations spectra.

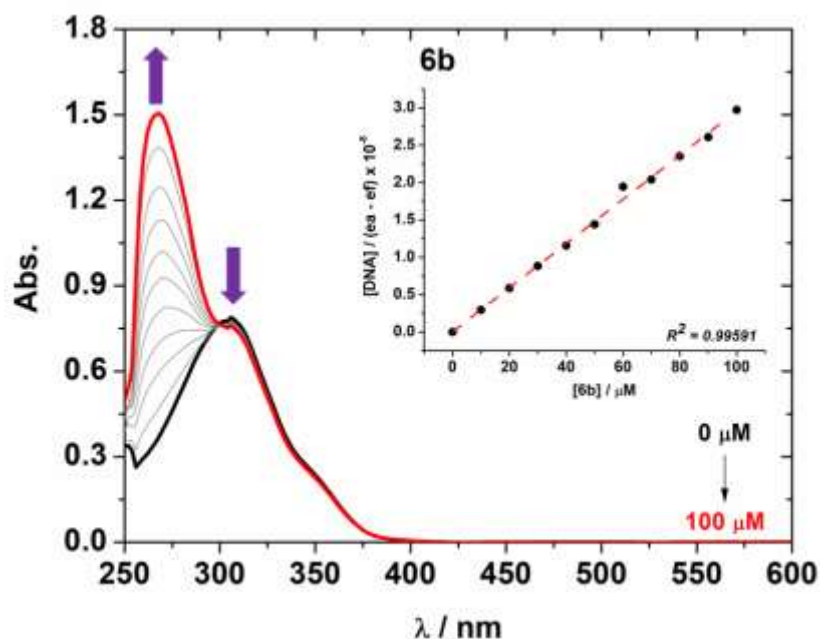

**Figure S39.** UV-Vis absorption spectra for compound **6b** and the effect of successive additions of CT-DNA solution in the presence of a fixed concentration of **6b**, in a DMSO(2%)/Tris-HCl buffer mixture (pH = 7.2). Insert graph shows the plot  $[DNA]/(\epsilon_a - \epsilon_f)$  versus  $[DNA]$ . The concentration of CT-DNA ranged from 0 to 100  $\mu\text{M}$ .

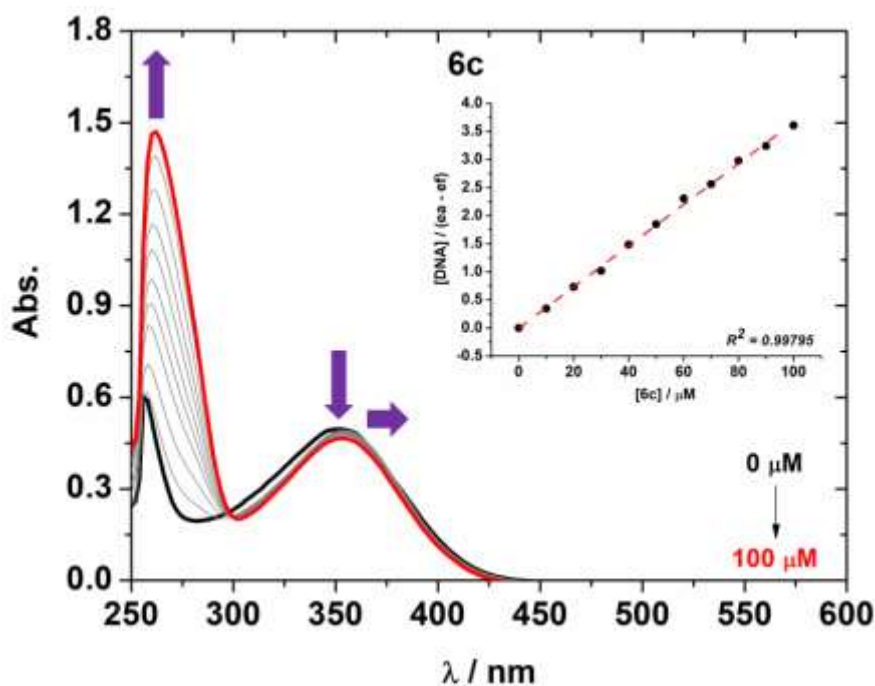

**Figure S40.** UV-Vis absorption spectra for compound **6c** and the effect of successive additions of CT-DNA solution in the presence of a fixed concentration of **6c**, in a DMSO(2%)/Tris-HCl buffer mixture (pH = 7.2). Insert graph shows the plot  $[DNA]/(\epsilon_a - \epsilon_f)$  versus  $[DNA]$ . The concentration of CT-DNA ranged from 0 to 100  $\mu\text{M}$ .



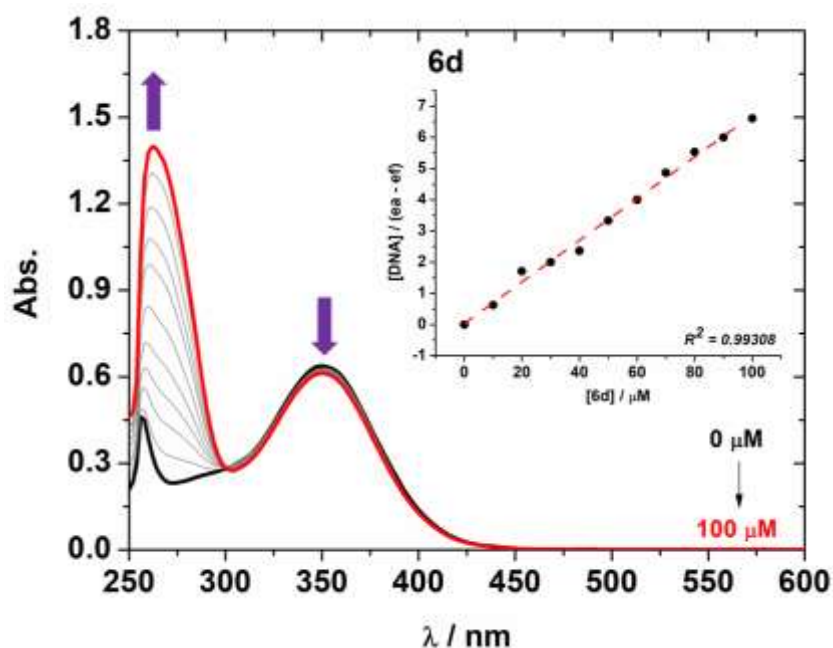

**Figure S41.** UV-Vis absorption spectra for compound **6d** and the effect of successive additions of CT-DNA solution in the presence of a fixed concentration of **6d**, in a DMSO(2%)/Tris-HCl buffer mixture (pH = 7.2). Insert graph shows the plot  $[DNA]/(\epsilon_a - \epsilon_f)$  versus  $[DNA]$ . The concentration of CT-DNA ranged from 0 to 100  $\mu\text{M}$ .

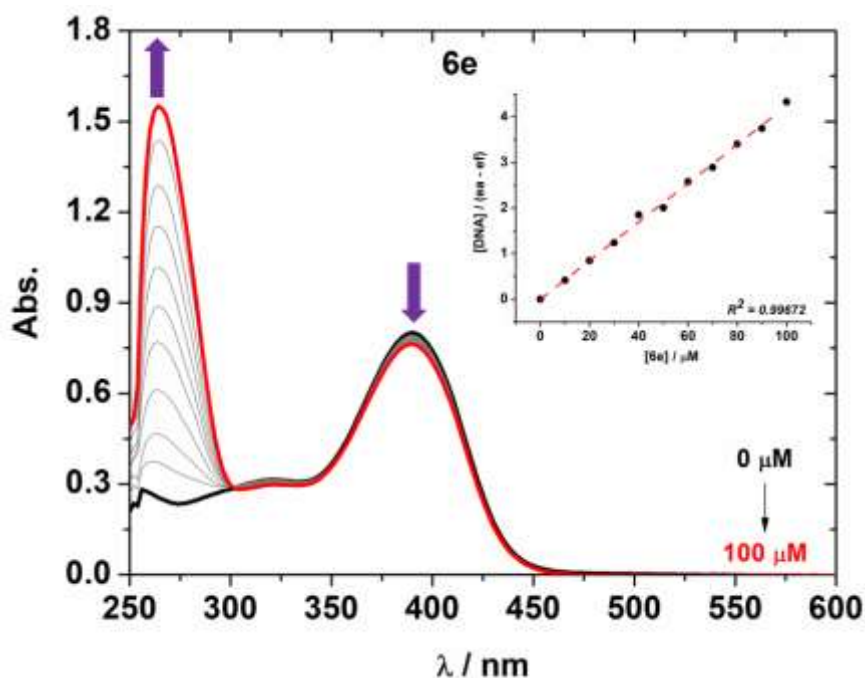

**Figure S42.** UV-Vis absorption spectra for compound **6e** and the effect of successive additions of CT-DNA solution in the presence of a fixed concentration of **6e**, in a DMSO(2%)/Tris-HCl buffer mixture (pH = 7.2). Insert graph shows the plot  $[DNA]/(\epsilon_a - \epsilon_f)$  versus  $[DNA]$ . The concentration of CT-DNA ranged from 0 to 100  $\mu\text{M}$ .

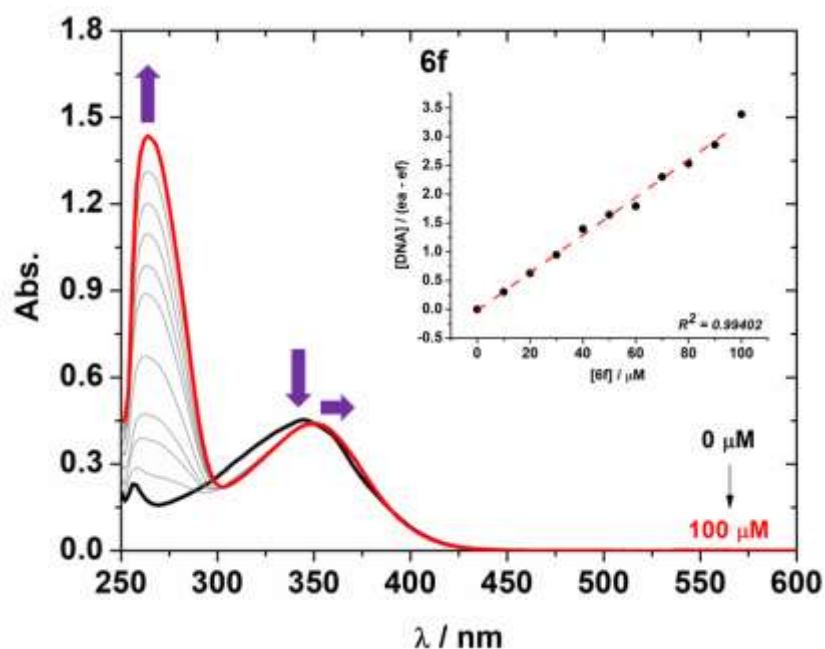

**Figure S43.** UV–Vis absorption spectra for compound **6f** and the effect of successive additions of CT-DNA solution in the presence of a fixed concentration of **6f**, in a DMSO(2%)/Tris-HCl buffer mixture (pH = 7.2). Insert graph shows the plot  $[DNA]/(\epsilon_a - \epsilon_f)$  versus  $[DNA]$ . The concentration of CT-DNA ranged from 0 to 100  $\mu\text{M}$ .

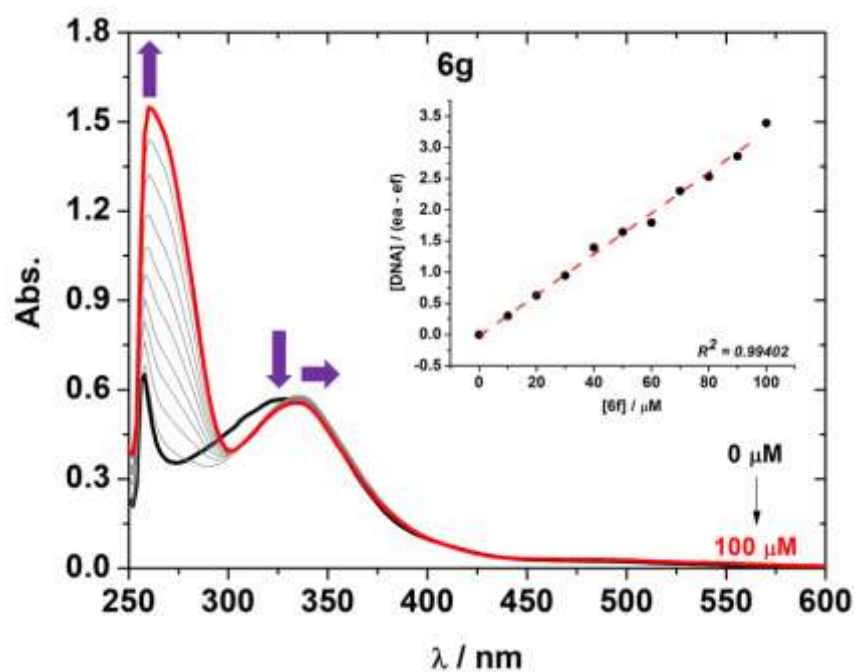

**Figure S44.** UV–Vis absorption spectra for compound **6g** and the effect of successive additions of CT-DNA solution in the presence of a fixed concentration of **6g**, in a DMSO(2%)/Tris-HCl buffer mixture (pH = 7.2). Insert graph shows the plot  $[DNA]/(\epsilon_a - \epsilon_f)$  versus  $[DNA]$ . The concentration of CT-DNA ranged from 0 to 100  $\mu\text{M}$ .

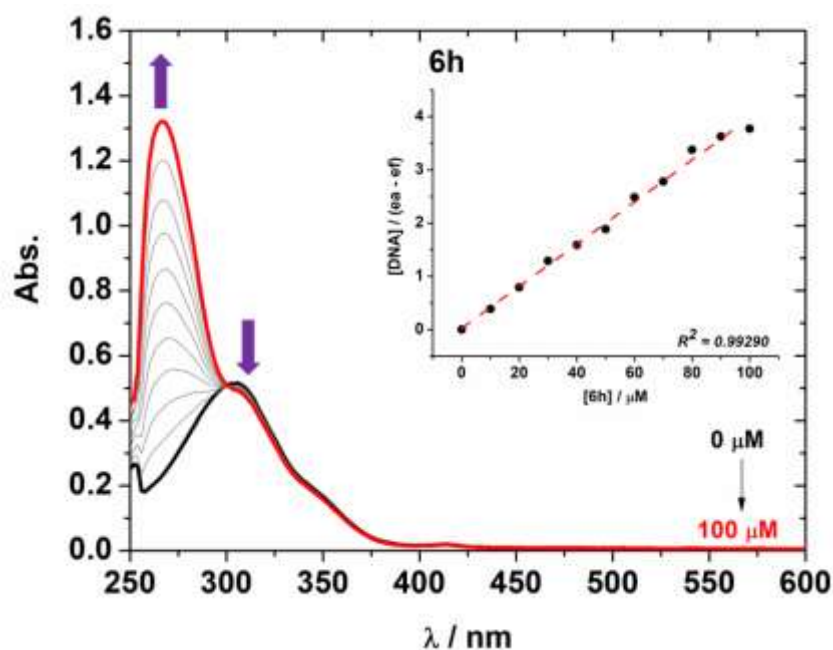

**Figure S45.** UV-Vis absorption spectra for compound **6h** and the effect of successive additions of CT-DNA solution in the presence of a fixed concentration of **6h**, in a DMSO(2%)/Tris-HCl buffer mixture (pH = 7.2). Insert graph shows the plot  $[DNA]/(\epsilon_a - \epsilon_f)$  versus  $[DNA]$ . The concentration of CT-DNA ranged from 0 to 100  $\mu\text{M}$ .

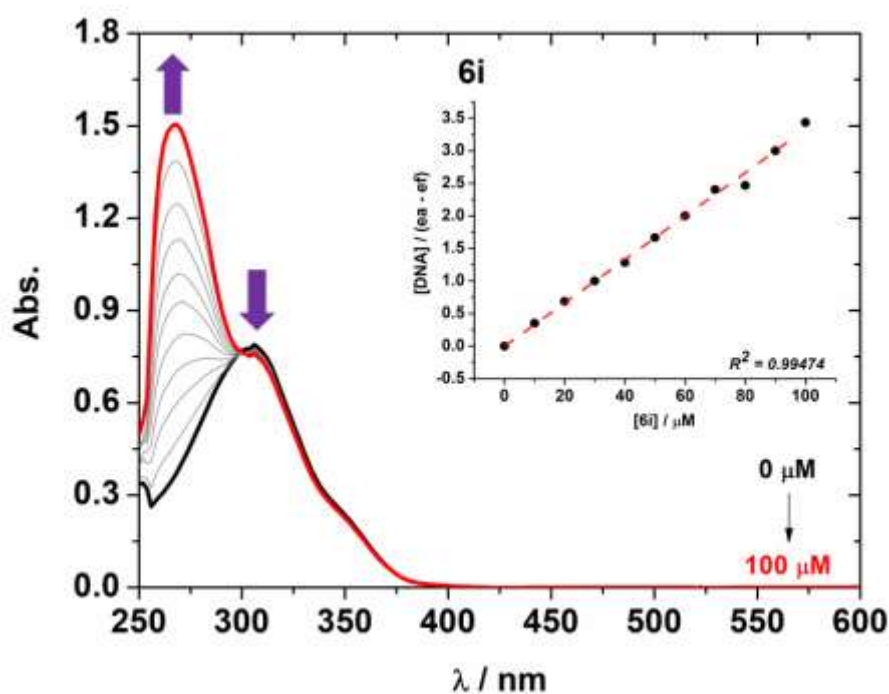

**Figure S46.** UV-Vis absorption spectra for compound **6i** and the effect of successive additions of CT-DNA solution in the presence of a fixed concentration of **6i**, in a DMSO(2%)/Tris-HCl buffer mixture (pH = 7.2). Insert graph shows the plot  $[DNA]/(\epsilon_a - \epsilon_f)$  versus  $[DNA]$ . The concentration of CT-DNA ranged from 0 to 100  $\mu\text{M}$ .

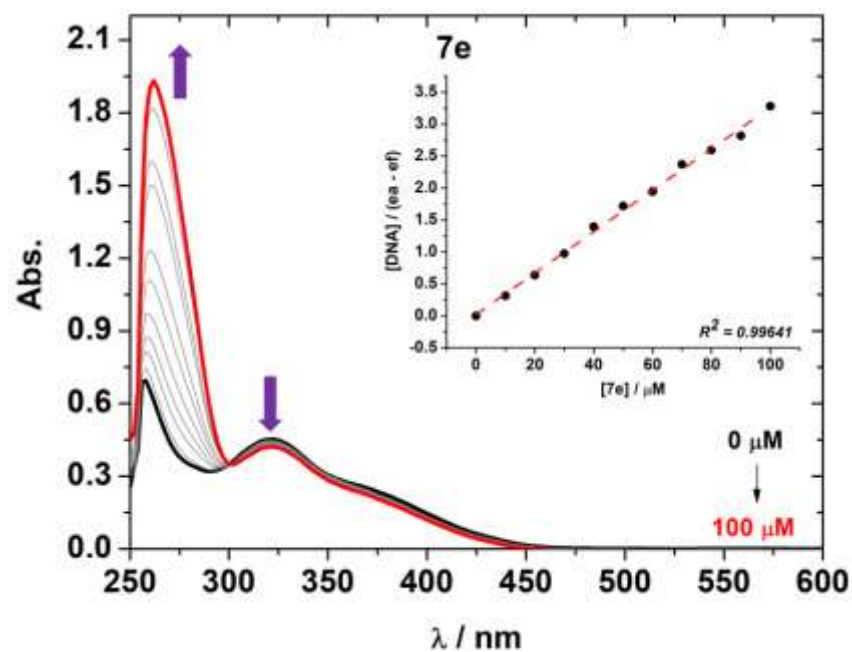

**Figure S47.** UV–Vis absorption spectra for compound **7e** and the effect of successive additions of CT-DNA solution in the presence of a fixed concentration of **7e**, in a DMSO(2%)/Tris-HCl buffer mixture (pH = 7.2). Insert graph shows the plot  $[DNA]/(\epsilon_a - \epsilon_f)$  versus  $[DNA]$ . The concentration of CT-DNA ranged from 0 to 100  $\mu M$ .

## 7. Competitive EB-DNA assays by emission fluorescence spectra

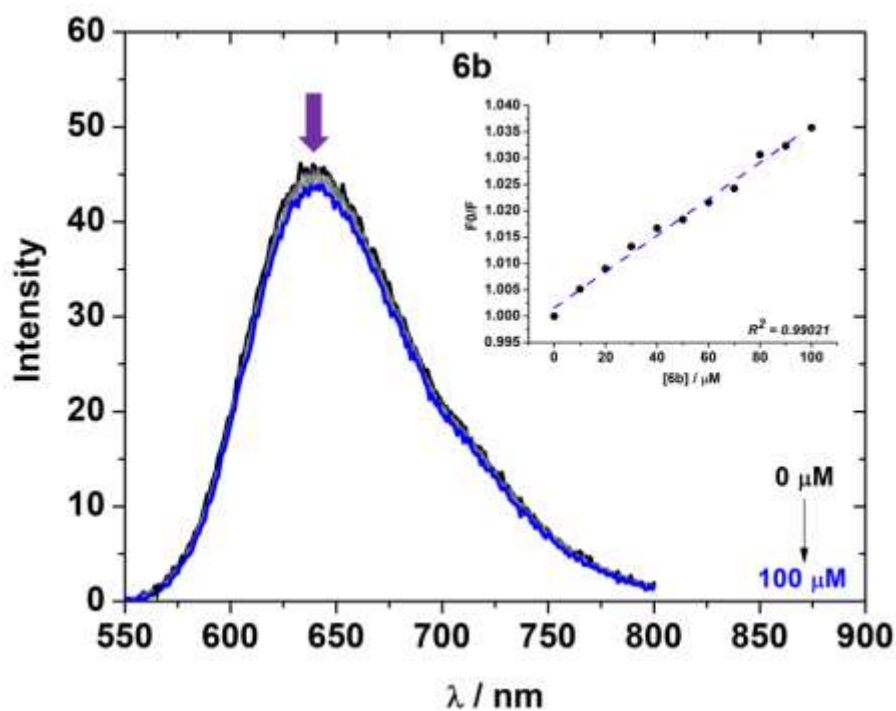

**Figure S48.** Fluorescence emission spectra of EB bound to CT-DNA in the presence of **6b** in a DMSO(2%)/Tris-HCl pH 7.2 mixture at  $\lambda_{\text{exc}}=510$  nm. The inset shows the plot of  $F_0/F$  versus the concentration of compound **6b** according to the Stern-Volmer equation.

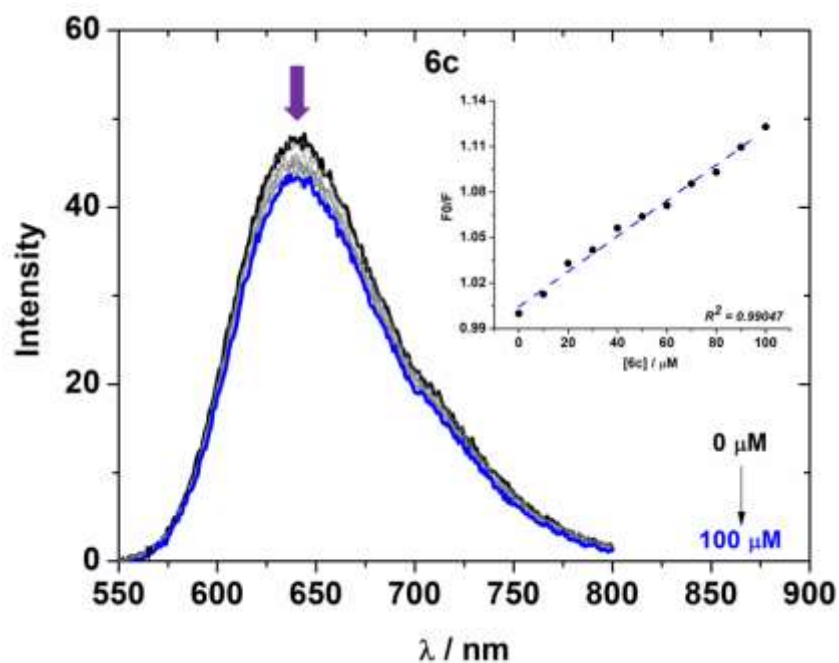

**Figure S49.** Fluorescence emission spectra of EB bound to CT-DNA in the presence of **6c** in a DMSO(2%)/Tris-HCl pH 7.2 mixture at  $\lambda_{\text{exc}}=510$  nm. The inset shows the plot of  $F_0/F$  versus the concentration of compound **6c** according to the Stern-Volmer equation.

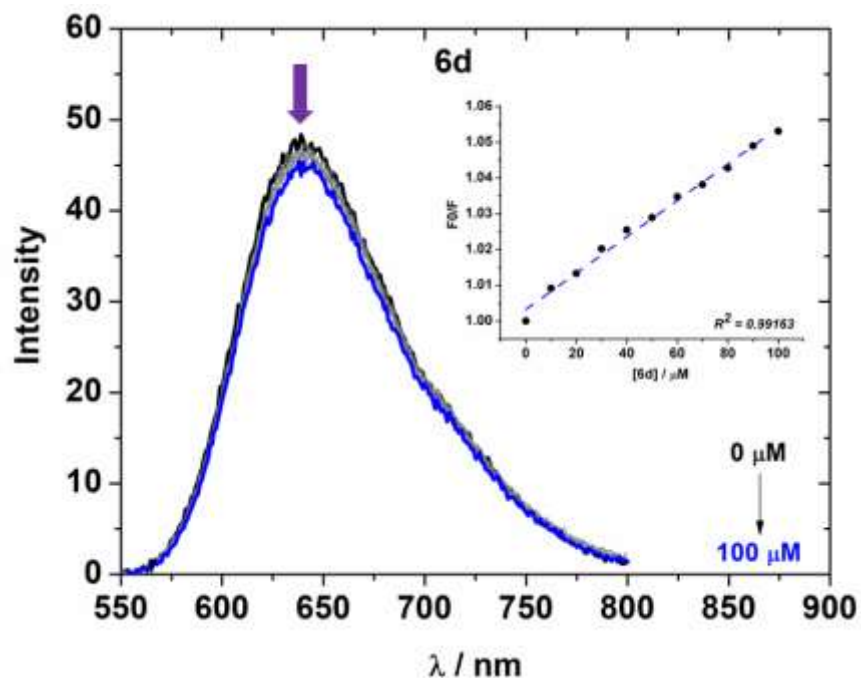

**Figure S50.** Fluorescence emission spectra of EB bound to CT-DNA in the presence of **6d** in a DMSO(2%)/Tris-HCl pH 7.2 mixture at  $\lambda_{\text{exc}}=510$  nm. The inset shows the plot of  $F_0/F$  versus the concentration of compound **6d** according to the Stern-Volmer equation.

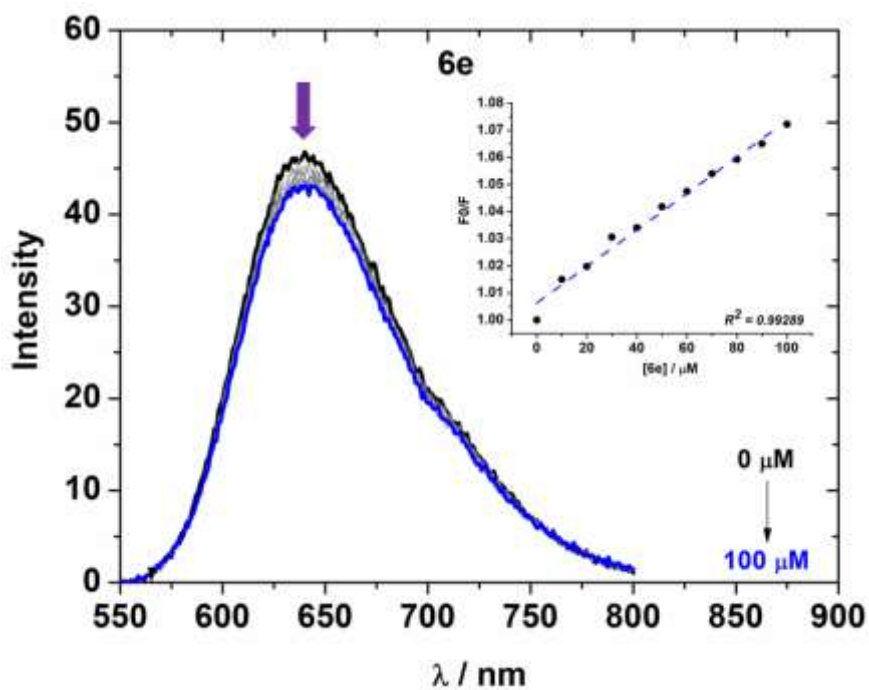

**Figure S51.** Fluorescence emission spectra of EB bound to CT-DNA in the presence of **6e** in a DMSO(2%)/Tris-HCl pH 7.2 mixture at  $\lambda_{\text{exc}}=510$  nm. The inset shows the plot of  $F_0/F$  versus the concentration of compound **6e** according to the Stern-Volmer equation.



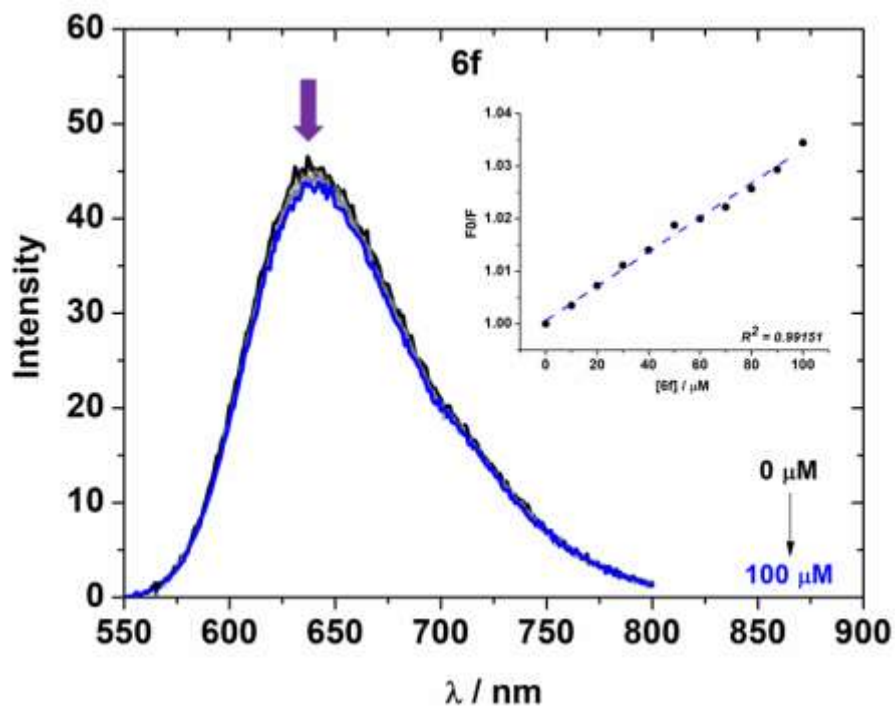

**Figure S52.** Fluorescence emission spectra of EB bound to CT-DNA in the presence of **6f** in a DMSO(2%)/Tris-HCl pH 7.2 mixture at  $\lambda_{\text{exc}}=510$  nm. The inset shows the plot of  $F_0/F$  versus the concentration of compound **6f** according to the Stern-Volmer equation.

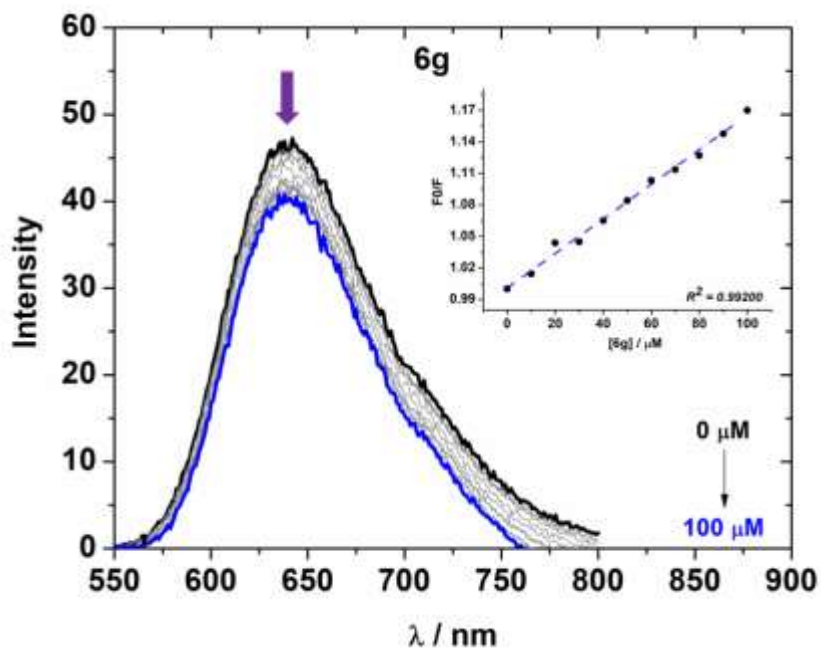

**Figure S53.** Fluorescence emission spectra of EB bound to CT-DNA in the presence of **6g** in a DMSO(2%)/Tris-HCl pH 7.2 mixture at  $\lambda_{\text{exc}}=510$  nm. The inset shows the plot of  $F_0/F$  versus the concentration of compound **6g** according to the Stern-Volmer equation.

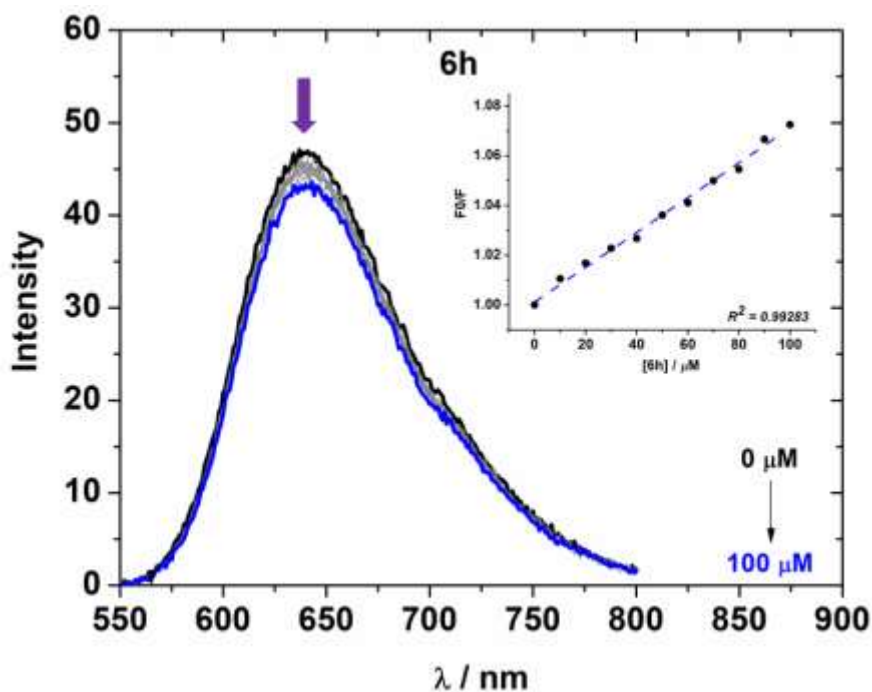

**Figure S54.** Fluorescence emission spectra of EB bound to CT-DNA in the presence of **6h** in a DMSO(2%)/Tris-HCl pH 7.2 mixture at  $\lambda_{\text{exc}}=510$  nm. The inset shows the plot of  $F_0/F$  versus the concentration of compound **6h** according to the Stern-Volmer equation.

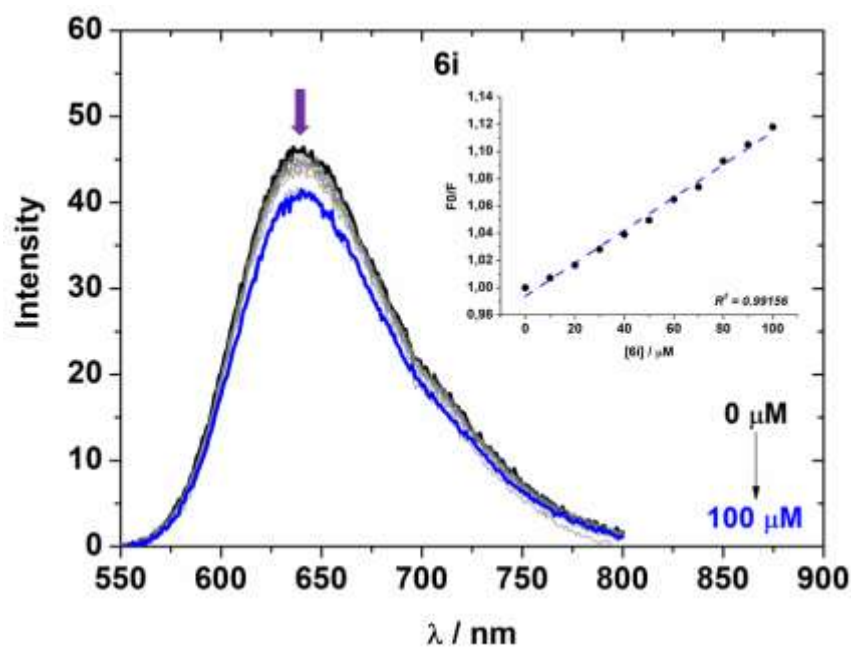

**Figure S55.** Fluorescence emission spectra of EB bound to CT-DNA in the presence of **6i** in a DMSO(2%)/Tris-HCl pH 7.2 mixture at  $\lambda_{\text{exc}}=510$  nm. The inset shows the plot of  $F_0/F$  versus the concentration of compound **6i** according to the Stern-Volmer equation.



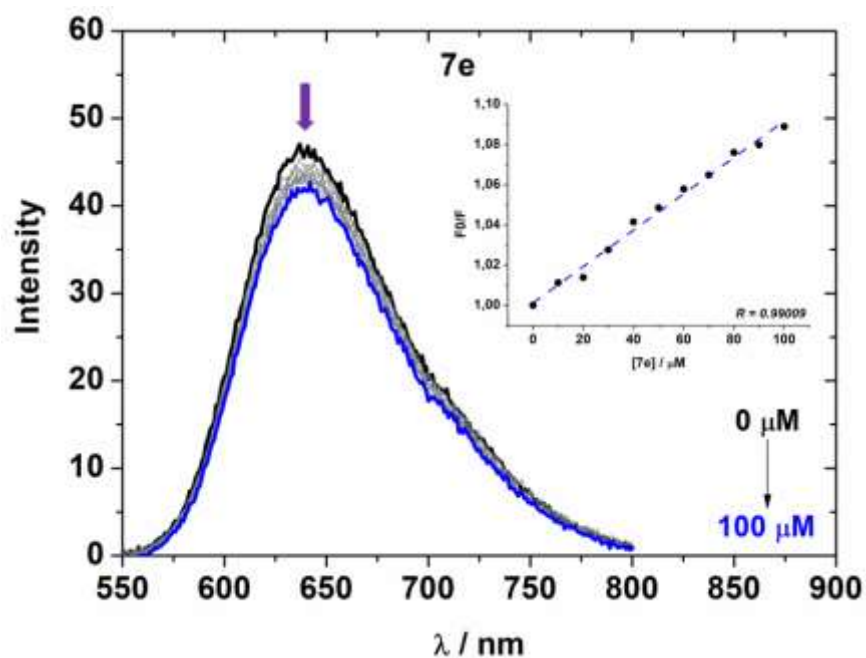

**Figure S56.** Fluorescence emission spectra of EB bound to CT-DNA in the presence of **7e** in a DMSO (2%)/Tris-HCl pH 7.2 mixture at  $\lambda_{\text{exc}}=510$  nm. The inset shows the plot of  $F_0/F$  versus the concentration of compound **7e** according to the Stern-Volmer equation.

## 8. TD-DFT Calculations

All calculations were done using the Gaussian 09 package of program. All geometrical structures were optimized at the SCRF(PCM)-B3LYP/cc-pVTZ level of theory, with single point energies and molecular orbitals calculated at the same level of theory. The PCM model was used to account for the solvent effect. Harmonic frequency calculations were done in order to confirm that the geometries were at the minimum potential energy

**Table S3.** Excitation energy (E), wavelength of maximum absorbance ( $\lambda_{\text{max}}$ ), and oscillator strengths ( $f$ ) for HOMO-LUMO orbitals in CH<sub>2</sub>Cl<sub>2</sub>, DMSO and MeOH for compound **6a**. Calculated at the TD-DFT (SCRF(PCM))-B3LYP/cc-pVTZ level.

| Solvente                        | Electronic Transitions | Energy (eV) | $\lambda_{\text{max}}$ (nm) | Main Orbital Transition |          | $F$    |
|---------------------------------|------------------------|-------------|-----------------------------|-------------------------|----------|--------|
| CH <sub>2</sub> Cl <sub>2</sub> | $S_0 \rightarrow S_1$  | 4.0338      | 307.36                      | 88-> 91                 | 0.19059  | 0.1034 |
|                                 |                        |             |                             | 89-> 91                 | 0.59301  |        |
|                                 |                        |             |                             | 90-> 91                 | 0.32649  |        |
|                                 | $S_0 \rightarrow S_2$  | 4.1314      | 300.10                      | 88-> 91                 | 0.35302  | 0.1260 |
|                                 |                        |             |                             | 89->91                  | -0.37669 |        |
|                                 |                        |             |                             | 90->91                  | 0.48004  |        |
|                                 | $S_0 \rightarrow S_3$  | 4.3134      | 287.44                      | 88->91                  | 0.57808  | 0.2549 |
|                                 |                        |             |                             | 90->91                  | -0.39955 |        |
| DMSO                            | $S_0 \rightarrow S_1$  | 3.9833      | 311.26                      | 88->91                  | 0.18891  | 0.0806 |
|                                 |                        |             |                             | 89->91                  | 0.60689  |        |
|                                 |                        |             |                             | 90->91                  | 0.30081  |        |
|                                 | $S_0 \rightarrow S_2$  | 4.0828      | 303.67                      | 88->91                  | 0.38352  | 0.0942 |
|                                 |                        |             |                             | 89->91                  | -0.35386 |        |
|                                 |                        |             |                             | 90->91                  | 0.47411  |        |
|                                 | $S_0 \rightarrow S_3$  | 4.3023      | 288.18                      | 88->91                  | 0.55882  | 0.3121 |
|                                 |                        |             |                             | 90->91                  | -0.42599 |        |
| MeOH                            | $S_0 \rightarrow S_1$  | 3.9906      | 310.69                      | 88->91                  | 0.18796  | 0.0754 |
|                                 |                        |             |                             | 89->91                  | 0.61152  |        |
|                                 |                        |             |                             | 90->91                  | 0.29179  |        |
|                                 | $S_0 \rightarrow S_2$  | 4.0906      | 303.10                      | 88->91                  | 0.39485  | 0.0914 |
|                                 |                        |             |                             | 89->91                  | -0.34559 |        |
|                                 |                        |             |                             | 90->91                  | 0.47087  |        |
|                                 | $S_0 \rightarrow S_3$  | 4.3110      | 287.60                      | 88->91                  | 0.55117  | 0.3078 |
|                                 |                        |             |                             | 90->91                  | 0.43574  |        |

**Figure S57.** Calculated UV-Vis spectra for compound **6a** in DCM, DMSO and MeOH.

**CH<sub>2</sub>Cl<sub>2</sub>**

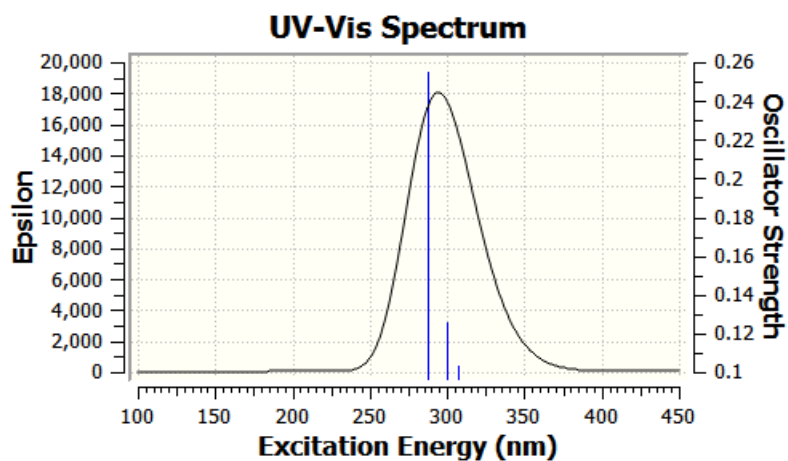

**DMSO**

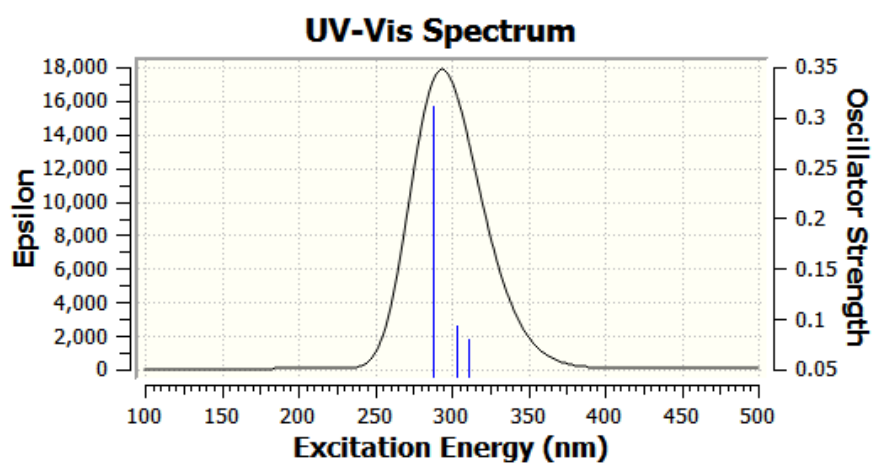

**MeOH**

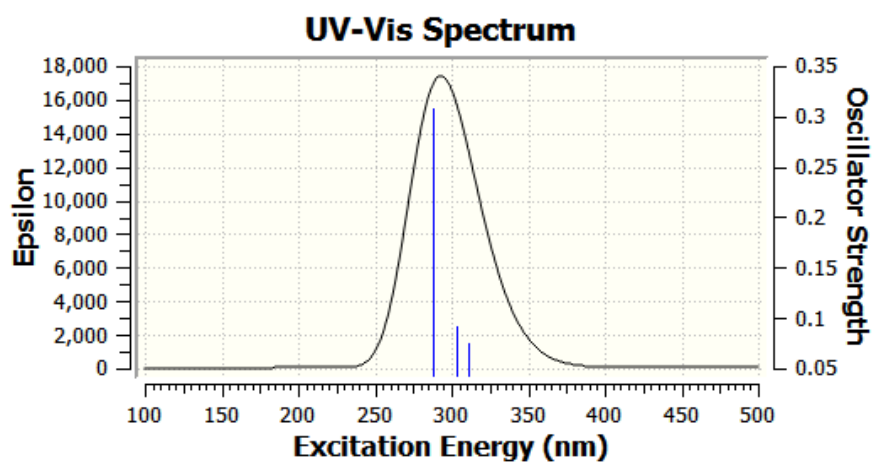

Figure S58.

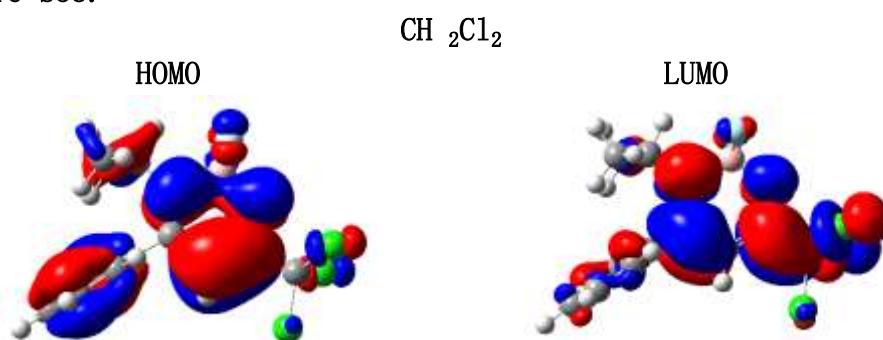

Figure S59.

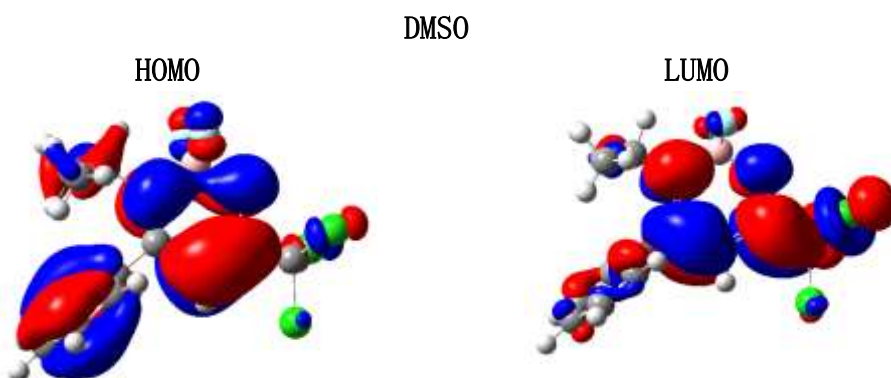

Figure S60.

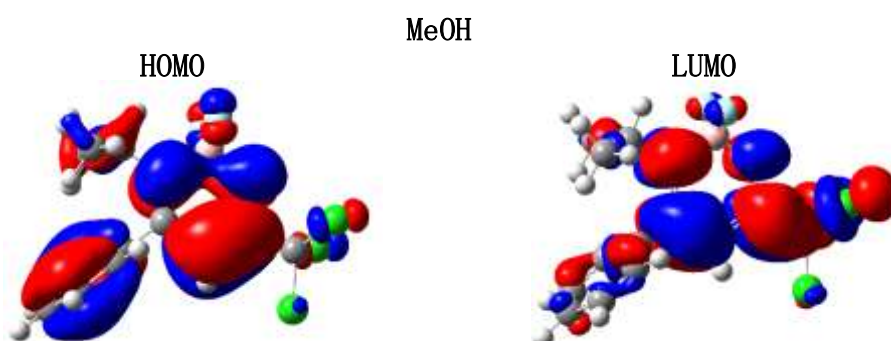

**Table S4.** Excitation energy (E), wavelength of maximum absorbance ( $\lambda_{\text{max}}$ ), and oscillator strengths ( $f$ ) for HOMO-LUMO orbitals in CH<sub>2</sub>Cl<sub>2</sub>, DMSO and MeOH for compound **6b**. Calculated at the TD-DFT (SCRF(PCM))-B3LYP/cc-pVTZ level.

| Solvente          | Electronic Transitions | Energy (eV) | $\lambda_{\text{max}}$ (nm) | Main Orbital Transition                                    | $F$    |
|-------------------|------------------------|-------------|-----------------------------|------------------------------------------------------------|--------|
| CHCl <sub>2</sub> | $S_0 \rightarrow S_1$  | 4.0823      | 303.71                      | 92 -> 95 -0.12387<br>93 -> 95 0.66122<br>94 -> 95 -0.20431 | 0.1641 |
|                   | $S_0 \rightarrow S_2$  | 4.1422      | 299.32                      | 92 -> 95 0.60112<br>94 -> 95 0.36527                       | 0.0607 |
|                   | $S_0 \rightarrow S_3$  | 4.2024      | 295.03                      | 92 -> 95 0.34355<br>93 -> 95 0.23748<br>94 -> 95 0.56656   | 0.3021 |
| DMSO              | $S_0 \rightarrow S_1$  | 4.0318      | 307.51                      | 92 -> 95 -0.16215<br>93 -> 95 0.66880<br>94 -> 95 -0.14379 | 0.1332 |
|                   | $S_0 \rightarrow S_2$  | 4.0857      | 303.46                      | 92 -> 95 0.64716<br>93 -> 95 0.10211<br>94 -> 95 -0.25634  | 0.0175 |
|                   | $S_0 \rightarrow S_3$  | 4.1981      | 295.34                      | 92 -> 95 0.22337<br>93 -> 95 0.19010<br>94 -> 95 0.64012   | 0.3808 |
| MeOH              | $S_0 \rightarrow S_1$  | 4.0404      | 306.86                      | 92 -> 95 -0.15707<br>93 -> 95 0.67160<br>94 -> 95 -0.13561 | 0.1246 |
|                   | $S_0 \rightarrow S_2$  | 4.0930      | 302.92                      | 92 -> 95 0.64880<br>93 -> 95 0.10109<br>94 -> 95 -0.25242  | 0.0169 |
|                   | $S_0 \rightarrow S_3$  | 4.2072      | 294.69                      | 92 -> 95 0.22208<br>93 -> 95 0.18016<br>94 -> 95 0.64343   | 0.3763 |

**Figure S61.** Calculated UV-Vis spectra for compound **6b** in DCM, DMSO and MeOH.

**CH<sub>2</sub>Cl<sub>2</sub>**

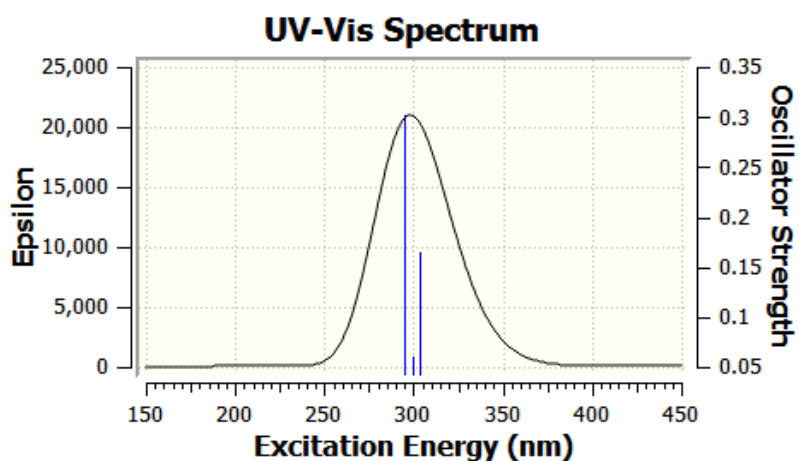

**DMSO**

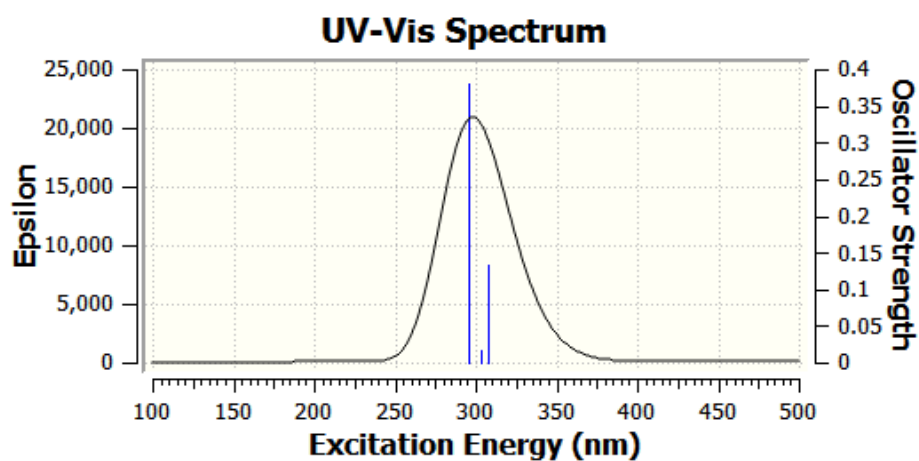

**MeOH**

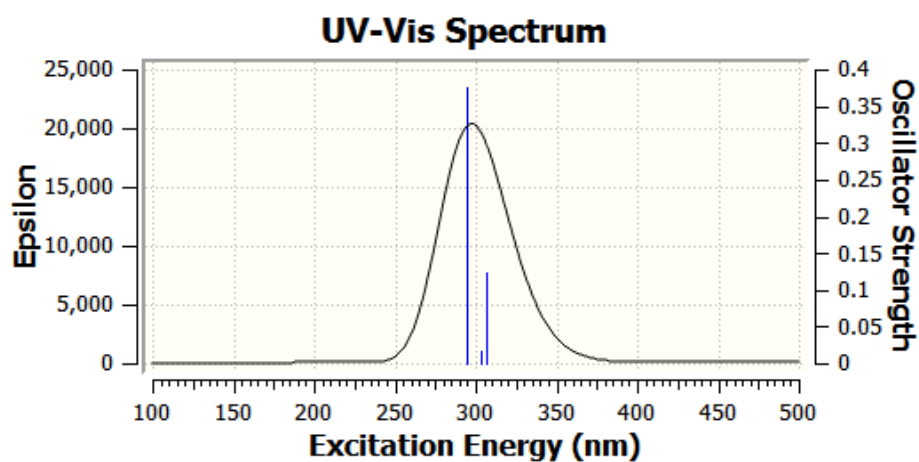

Figure S62.

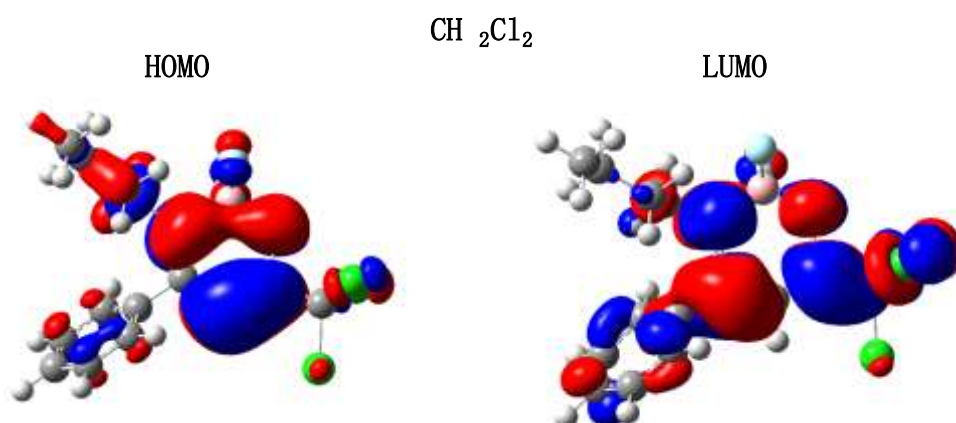

Figure S63.

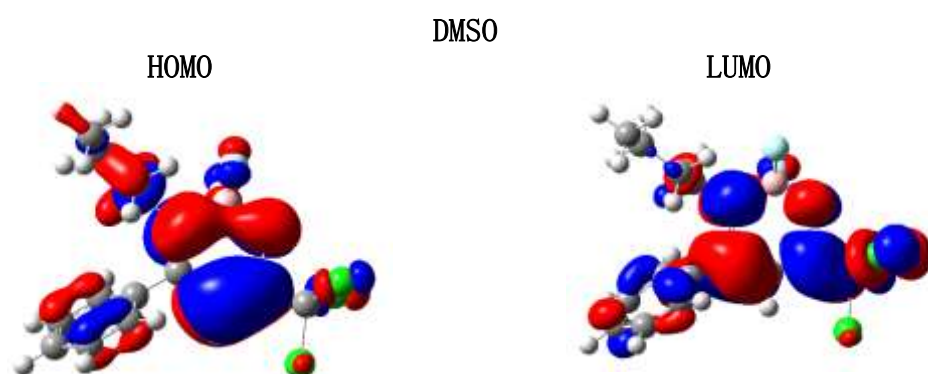

Figure S64.

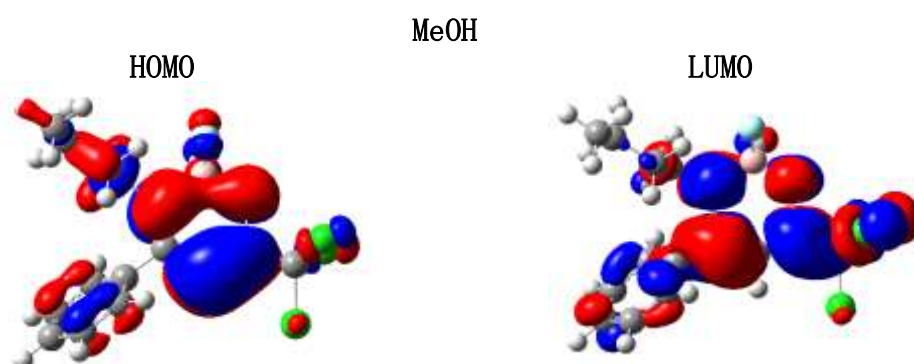



**Table S5.** Excitation energy (E), wavelength of maximum absorbance ( $\lambda_{\text{max}}$ ), and oscillator strengths ( $f$ ) for HOMO-LUMO orbitals in CH<sub>2</sub>Cl<sub>2</sub>, DMSO and MeOH for compound **6c**. Calculated at the TD-DFT (SCRF(PCM))-B3LYP/cc-pVTZ level.

| Solvente                        | Electronic Transitions          | Energy (eV) | $\lambda_{\text{max}}$ (nm) | Main Orbital Transition                    |                                | $F$    |
|---------------------------------|---------------------------------|-------------|-----------------------------|--------------------------------------------|--------------------------------|--------|
| CH <sub>2</sub> Cl <sub>2</sub> | S <sub>0</sub> → S <sub>1</sub> | 3.4565      | 358.70                      | 98 -> 99                                   | 0.69241                        | 0.1148 |
|                                 | S <sub>0</sub> → S <sub>2</sub> | 3.8209      | 324.49                      | 96 -> 99<br>97 -> 99                       | 0.23182<br>0.66346             | 0.0752 |
|                                 | S <sub>0</sub> → S <sub>3</sub> | 3.9770      | 311.75                      | 95 -> 99<br>96 -> 99<br>97 -> 99           | 0.60326<br>0.33090<br>-0.10859 | 0.0506 |
| DMSO                            | S <sub>0</sub> → S <sub>1</sub> | 3.4611      | 358.22                      | 98 -> 99                                   | 0.69353                        | 0.1023 |
|                                 | S <sub>0</sub> → S <sub>2</sub> | 3.8225      | 324.36                      | 96 -> 99<br>0.26777<br>97 -> 99<br>0.64997 | –                              | 0.0792 |
|                                 | S <sub>0</sub> → S <sub>3</sub> | 3.9366      | 314.95                      | 95 -> 99<br>96 -> 99<br>97 -> 99           | 0.60022<br>0.33641<br>0.12037  | 0.0317 |
| MeOH                            | S <sub>0</sub> → S <sub>1</sub> | 3.4639      | 357.93                      | 98 -> 99                                   | 0.69299                        | 0.0995 |
|                                 | S <sub>0</sub> → S <sub>2</sub> | 3.8241      | 324.22                      | 96 -> 99<br>97 -> 99                       | -0.27534<br>0.64688            | 0.0693 |
|                                 | S <sub>0</sub> → S <sub>3</sub> | 3.9423      | 314.50                      | 95 -> 99<br>96 -> 99<br>97 -> 99           | 0.61191<br>0.31674<br>0.11425  | 0.0284 |

**Figure S64.** Calculated UV-Vis spectra for compound **6c** in DCM, DMSO and MeOH.

**CH<sub>2</sub>Cl<sub>2</sub>**

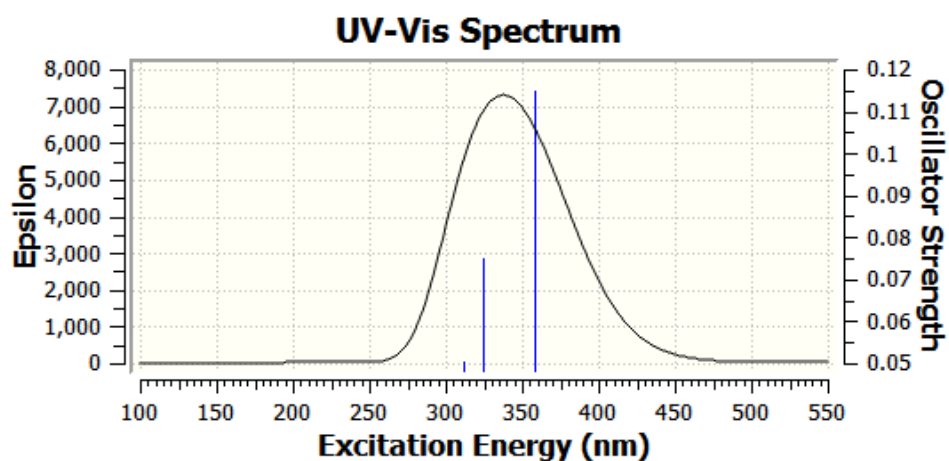

**DMSO**

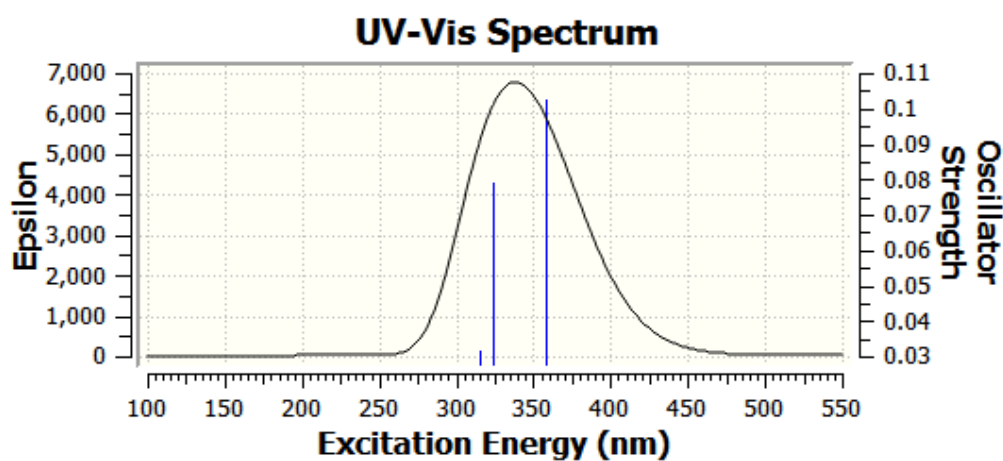

**MeOH**

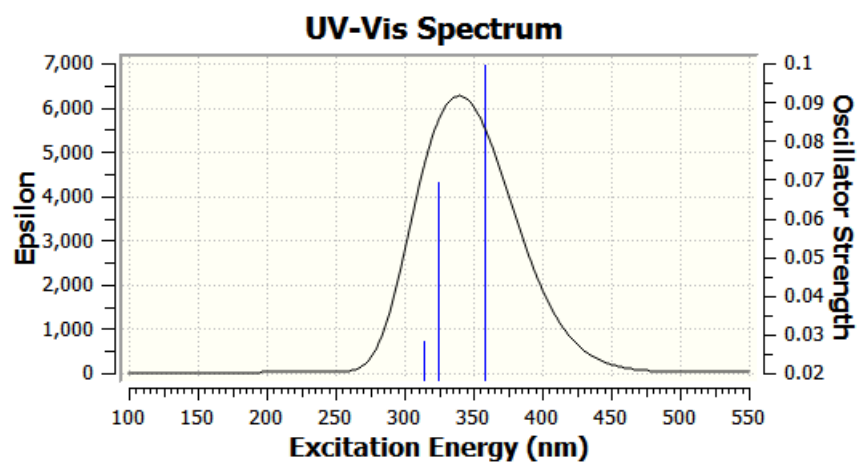

Figure S65.

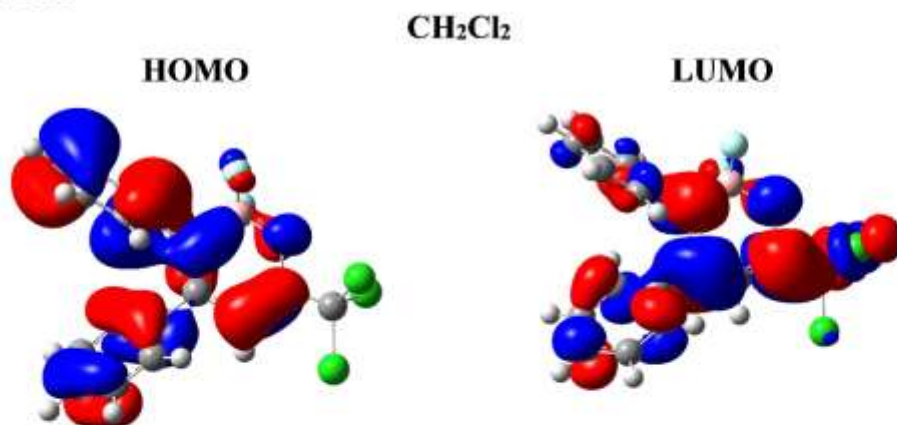

Figure S66.

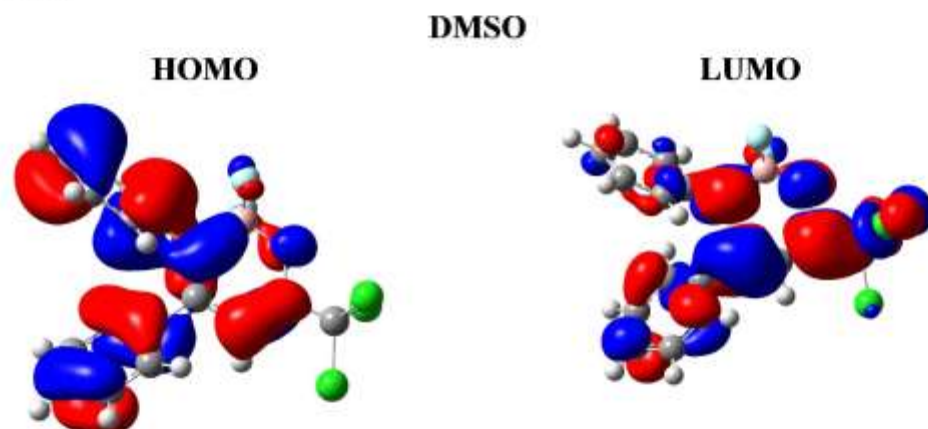

Figure S67.

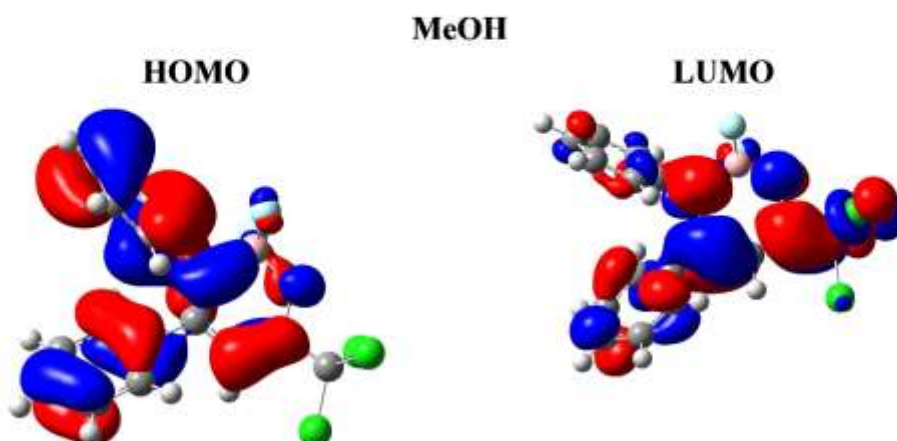

**Table S6.** Excitation energy (E), wavelength of maximum absorbance ( $\lambda_{\text{max}}$ ), and oscillator strengths ( $f$ ) for HOMO-LUMO orbitals in CH<sub>2</sub>Cl<sub>2</sub>, DMSO and MeOH for compound **6d**. Calculated at the TD-DFT (SCRF(PCM))-B3LYP/cc-pVTZ level.

| Solvente                        | Electronic Transitions | Energy (eV) | $\lambda_{\text{max}}$ (nm) | Main Orbital Transition                                   |                     | $F$    |
|---------------------------------|------------------------|-------------|-----------------------------|-----------------------------------------------------------|---------------------|--------|
| CH <sub>2</sub> Cl <sub>2</sub> | $S_0 \rightarrow S_1$  | 3.2544      | 380.98                      | 102 $\rightarrow$ 103                                     | 0.69992             | 0.1387 |
|                                 | $S_0 \rightarrow S_2$  | 3.7778      | 328.19                      | 100 $\rightarrow$ 103<br>101 $\rightarrow$ 103            | -0.13860<br>0.69026 | 0.0550 |
|                                 | $S_0 \rightarrow S_3$  | 3.9832      | 311.27                      | 99 $\rightarrow$ 103<br>100 $\rightarrow$ 103             | 0.59005<br>-0.36075 | 0.0647 |
| DMSO                            | $S_0 \rightarrow S_1$  | 3.2558      | 380.81                      | 102 $\rightarrow$ 103                                     | 0.70024             | 0.1263 |
|                                 | $S_0 \rightarrow S_2$  | 3.7751      | 328.43                      | 100 $\rightarrow$ 103<br>0.14824 101<br>$\rightarrow$ 103 | –<br>0.68828        | 0.0605 |
|                                 | $S_0 \rightarrow S_3$  | 3.9394      | 314.73                      | 99 $\rightarrow$ 103<br>100 $\rightarrow$ 103             | 0.62403<br>0.30944  | 0.0261 |
| MeOH                            | $S_0 \rightarrow S_1$  | 3.2581      | 380.54                      | 102 $\rightarrow$ 103                                     | 0.69998             | 0.1234 |
|                                 | $S_0 \rightarrow S_2$  | 3.7771      | 328.25                      | 100 $\rightarrow$ 103<br>101 $\rightarrow$ 103            | -0.15716<br>0.68630 | 0.0540 |
|                                 | $S_0 \rightarrow S_3$  | 3.9451      | 314.28                      | 99 $\rightarrow$ 103<br>100 $\rightarrow$ 103             | 0.63143<br>-0.29398 | 0.0238 |

**Figure S68.** Calculated UV-Vis spectra for compound **6d** in DCM, DMSO and MeOH.  
CH<sub>2</sub>Cl<sub>2</sub>

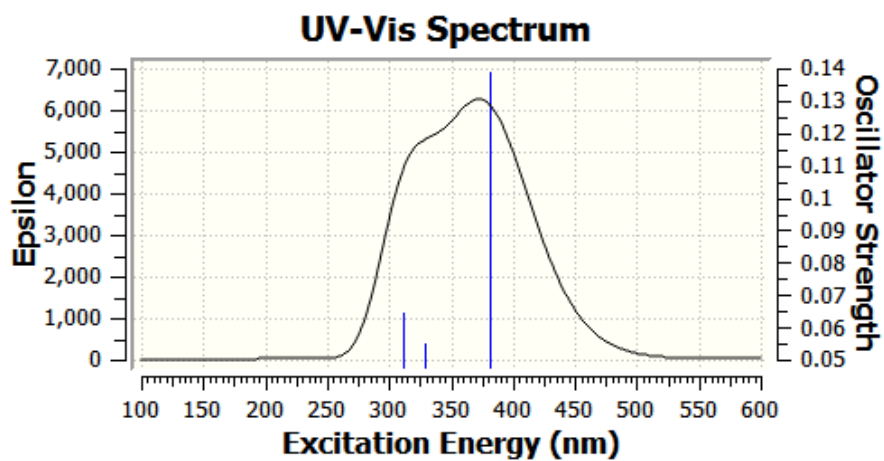

DMSO

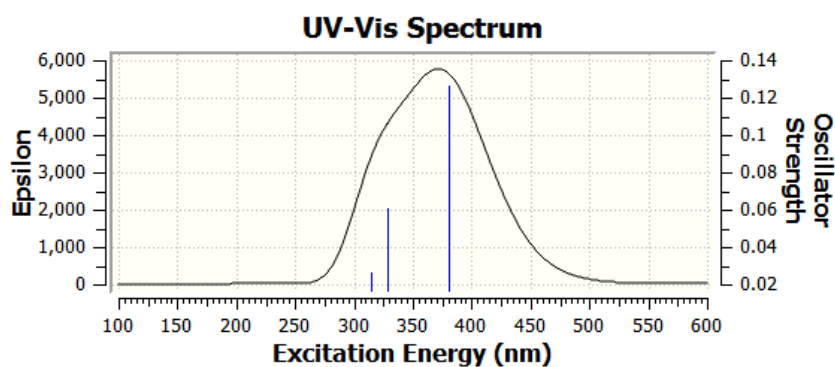

MeOH

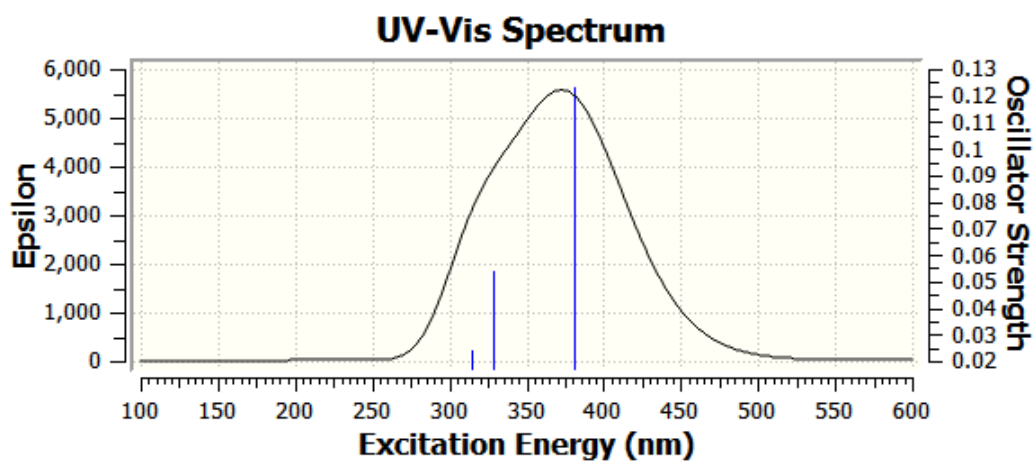

Figure S69

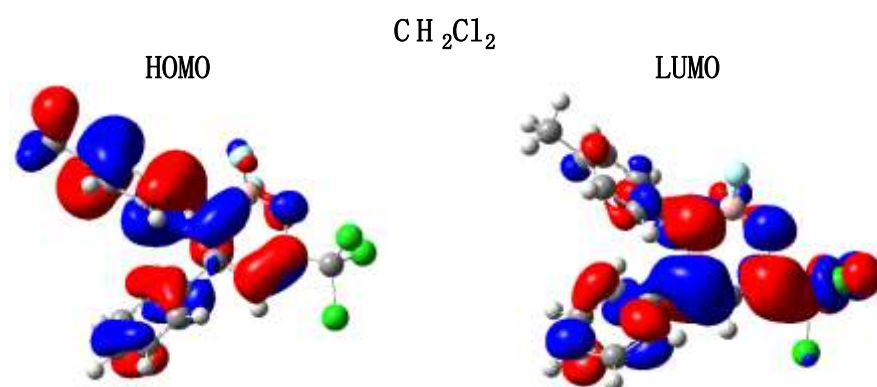

Figure S70.

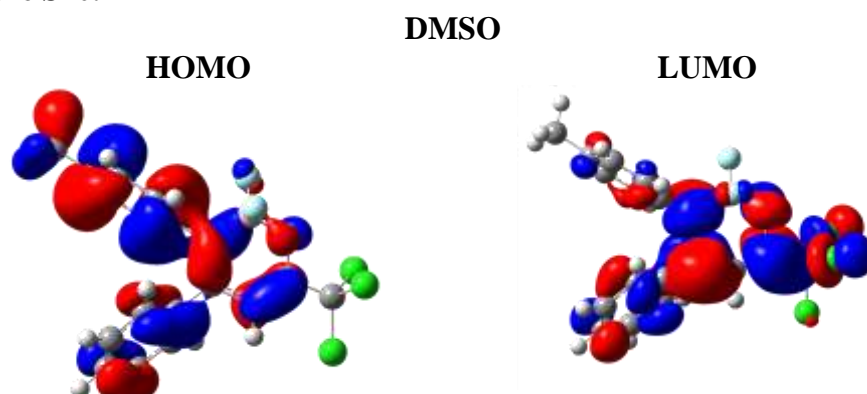

Figure S71.

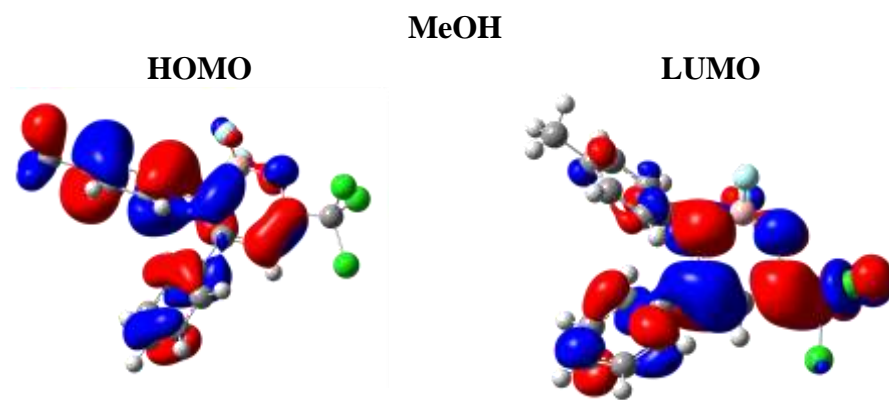

**Table S7.** Excitation energy (E), wavelength of maximum absorbance ( $\lambda_{\text{max}}$ ), and oscillator strengths ( $f$ ) for HOMO-LUMO orbitals in CH<sub>2</sub>Cl<sub>2</sub>, DMSO and MeOH for compound **6e**. Calculated at the TD-DFT (SCRF(PCM))-B3LYP/cc-pVTZ level.

| Solvente                        | Electronic Transitions | Energy (eV) | $\lambda_{\text{max}}$ (nm) | Main Orbital Transition                     | $F$    |
|---------------------------------|------------------------|-------------|-----------------------------|---------------------------------------------|--------|
| CH <sub>2</sub> Cl <sub>2</sub> | $S_0 \rightarrow S_1$  | 2.8912      | 428.83                      | 106 ->107 0.70356                           | 0.1437 |
|                                 | $S_0 \rightarrow S_2$  | 3.8371      | 323.12                      | 104 ->107 -<br>0.18783<br>105 ->107 0.67812 | 0.1100 |
|                                 | $S_0 \rightarrow S_3$  | 3.9917      | 310.61                      | 103 ->107 0.66599<br>104 ->107 -0.20660     | 0.0170 |
| DMSO                            | $S_0 \rightarrow S_1$  | 2.8904      | 428.95                      | 106 ->107 0.70360                           | 0.1327 |
|                                 | $S_0 \rightarrow S_2$  | 3.8281      | 323.88                      | 104 ->107 -<br>0.17206<br>105 ->107 0.68097 | 0.1277 |
|                                 | $S_0 \rightarrow S_3$  | 3.9450      | 314.28                      | 103 ->107 0.61897<br>104 ->107 -0.32463     | 0.0141 |
| MeOH                            | $S_0 \rightarrow S_1$  | 2.8936v     | 428.48                      | 106 ->107 0.70350                           | 0.1296 |
|                                 | $S_0 \rightarrow S_2$  | 3.8319      | 323.56                      | 104 ->107 -0.18571<br>105 ->107 0.67745     | 0.1139 |
|                                 | $S_0 \rightarrow S_3$  | 3.9510      | 313.80                      | 103 ->107 0.63214<br>104 ->107 -0.29783     | 0.0134 |

**Figure S72.** Calculated UV-Vis spectra for compound **6e** in DCM, DMSO and MeOH.

**CH<sub>2</sub>Cl<sub>2</sub>**

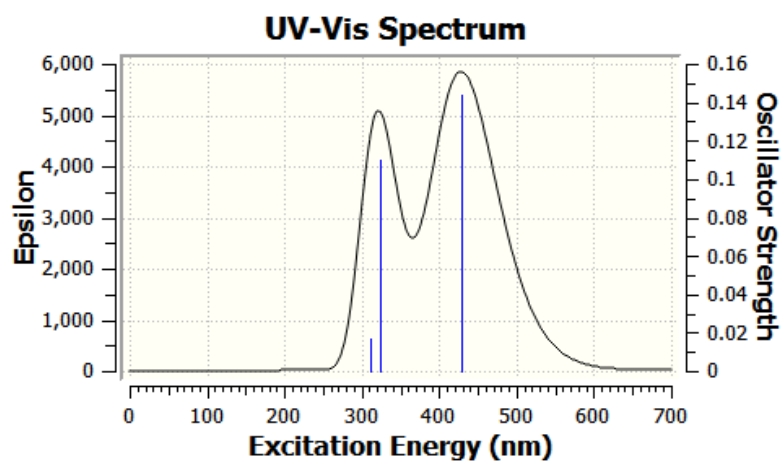

**DMSO**

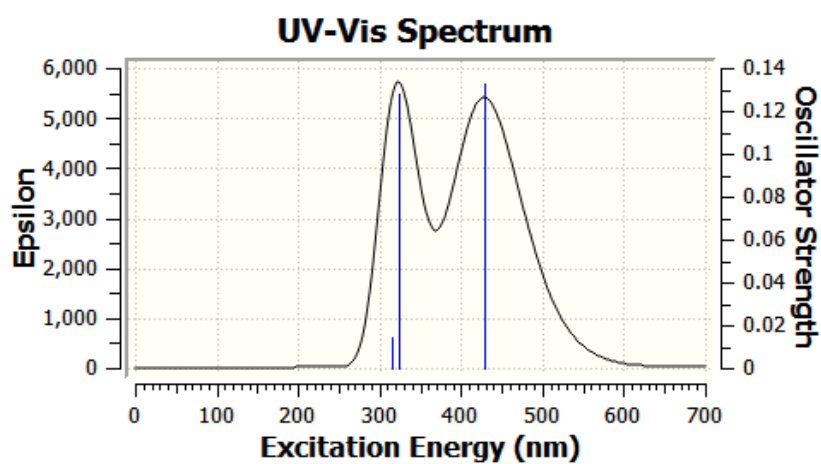

**MeOH**

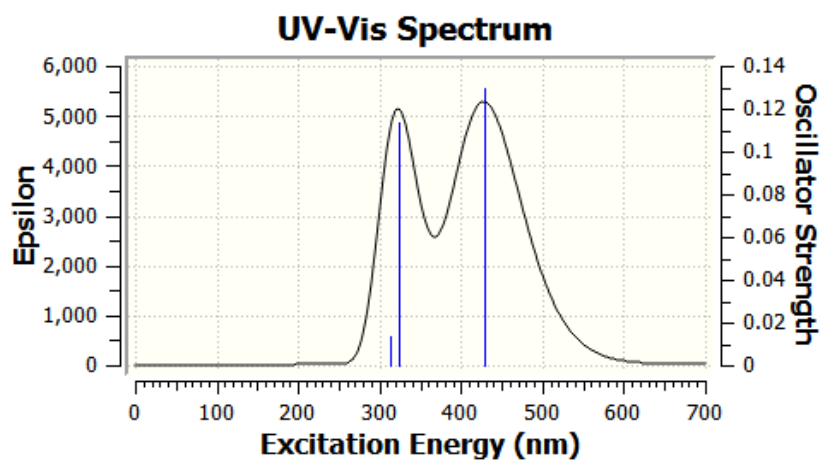



Figure S73.

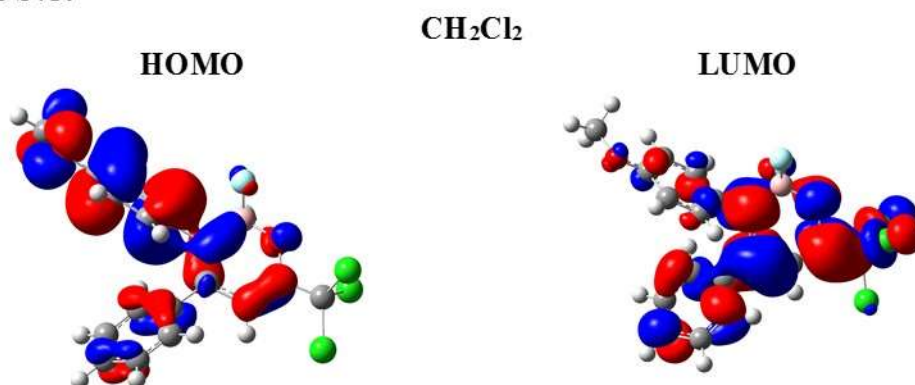

Figure S74.

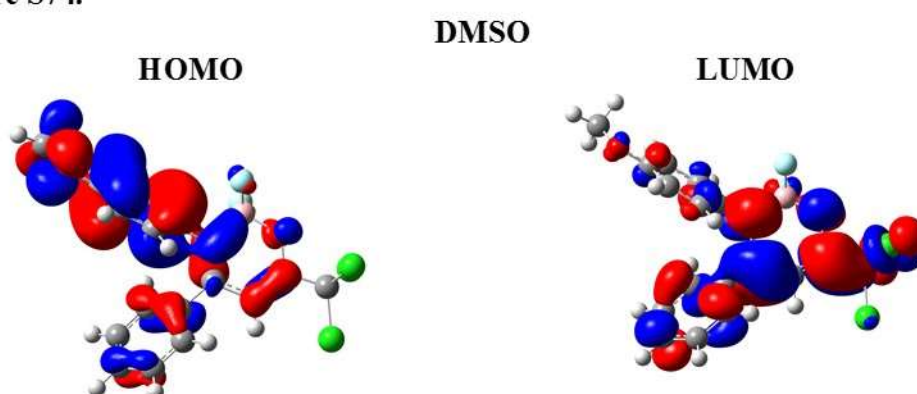

Figure S75.

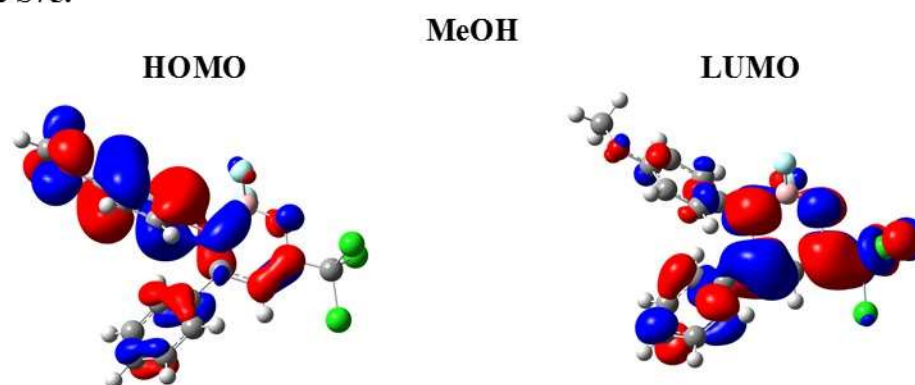

**Table S8.** Excitation energy (E), wavelength of maximum absorbance ( $\lambda_{\text{max}}$ ), and oscillator strengths ( $f$ ) for HOMO-LUMO orbitals in CH<sub>2</sub>Cl<sub>2</sub>, DMSO and MeOH for compound **6f**. Calculated at the TD-DFT (SCRF(PCM))-B3LYP/cc-pVTZ level.

| Solvente                        | Electronic Transitions | Energy (eV) | $\lambda_{\text{max}}$ (nm) | Main Orbital Transition                                     |                                           | $F$    |
|---------------------------------|------------------------|-------------|-----------------------------|-------------------------------------------------------------|-------------------------------------------|--------|
| CH <sub>2</sub> Cl <sub>2</sub> | $S_0 \rightarrow S_1$  | 3.5466      | 349.59                      | 108 ->110<br>109 ->110                                      | 0.17814<br>0.67653                        | 0.2502 |
|                                 | $S_0 \rightarrow S_2$  | 3.7732      | 328.60                      | 104 ->110<br>104 ->111<br>108 ->110<br>109 ->110<br>0.16808 | 0.14865<br>0.15791<br>0.63710<br>–        | 0.4102 |
|                                 | $S_0 \rightarrow S_3$  | 3.7919      | 326.97                      | 107 ->110                                                   | 0.69116                                   | 0.0238 |
| DMSO                            | $S_0 \rightarrow S_1$  | 3.5318      | 351.05                      | 108 ->110<br>109 ->110                                      | 0.12826<br>0.68633                        | 0.2227 |
|                                 | $S_0 \rightarrow S_2$  | 3.7419      | 331.34                      | 107 ->110<br>107 ->111                                      | 0.69158<br>-0.10871                       | 0.0227 |
|                                 | $S_0 \rightarrow S_3$  | 3.7631      | 329.47                      | 104 ->110<br>104 ->111<br>108 ->110<br>109 ->110            | 0.13451<br>0.13661<br>0.65569<br>-0.12666 | 0.4408 |
| MeOH                            | $S_0 \rightarrow S_1$  | 3.5390      | 350.34                      | 108 ->110<br>109 ->110                                      | 0.13849<br>0.68407                        | 0.2162 |
|                                 | $S_0 \rightarrow S_2$  | 3.7485      | 330.76                      | 107 ->110<br>107 ->111                                      | 0.69267<br>-0.10681                       | 0.0217 |
|                                 | $S_0 \rightarrow S_3$  | 3.7718      | 328.72                      | 104 ->110<br>104 ->111<br>108 ->110<br>109 ->110            | 0.14919<br>0.15167<br>0.64870<br>-0.13342 | 0.4146 |

**Figure S76.** Calculated UV-Vis spectra for compound **6f** in DCM, DMSO and MeOH.

**CH<sub>2</sub>Cl<sub>2</sub>**

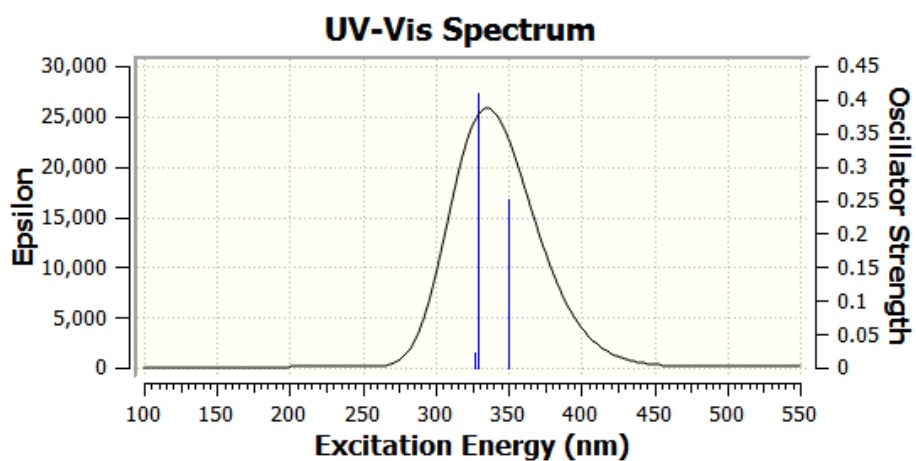

**DMSO**

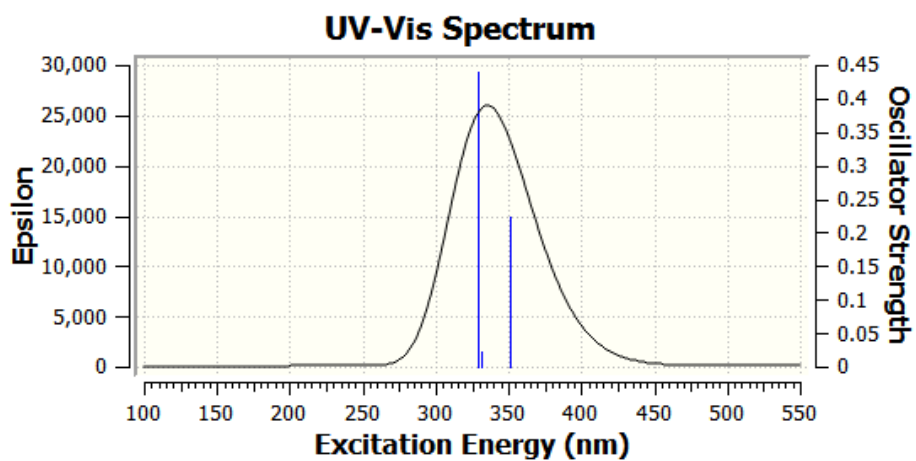

**MeOH**

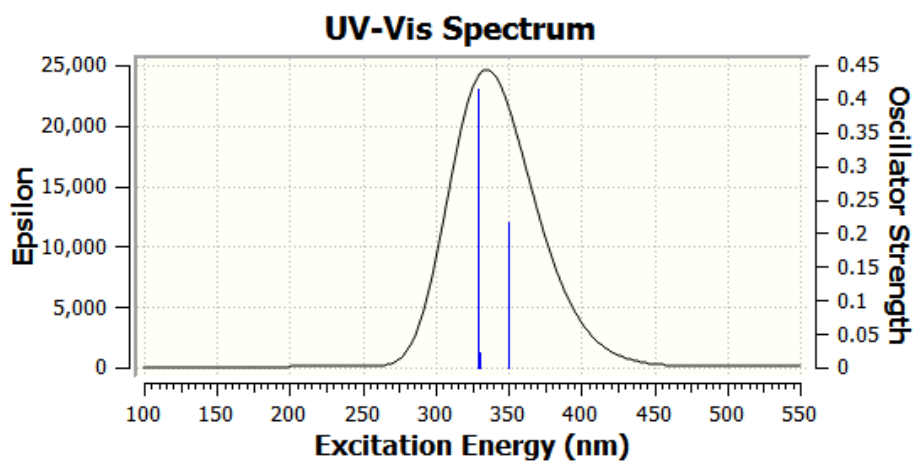

Figure S77.

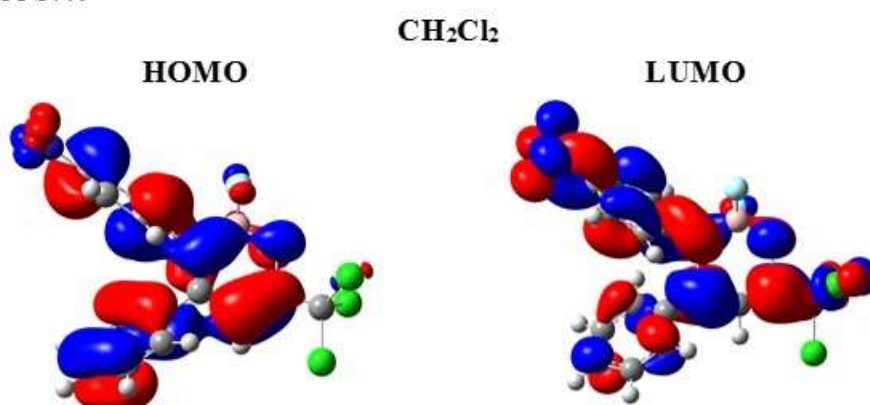

Figure S78.

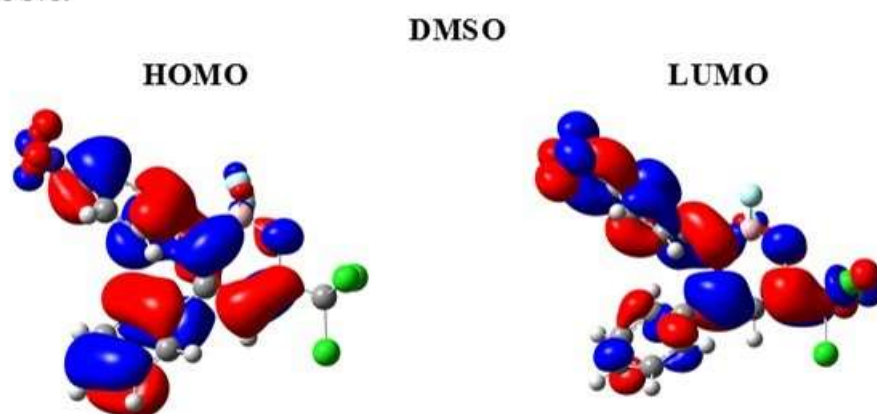

Figure S79.

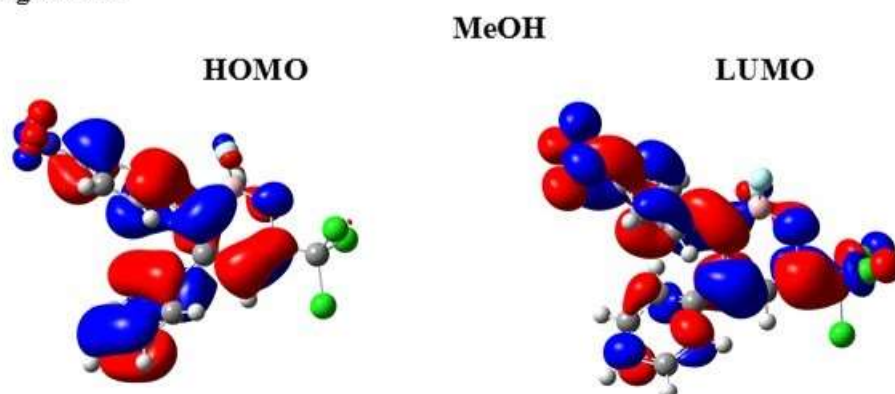

**Table S9.** Excitation energy (E), wavelength of maximum absorbance ( $\lambda_{\text{max}}$ ), and oscillator strengths ( $f$ ) for HOMO-LUMO orbitals in CH<sub>2</sub>Cl<sub>2</sub>, DMSO and MeOH for compound **6g**. Calculated at the TD-DFT (SCRF(PCM))-B3LYP/cc-pVTZ level.

| Solvente                        | Electronic Transitions | Energy (eV) | $\lambda_{\text{max}}$ (nm) | Main Orbital Transition            |                                 | $F$    |
|---------------------------------|------------------------|-------------|-----------------------------|------------------------------------|---------------------------------|--------|
| CH <sub>2</sub> Cl <sub>2</sub> | $S_0 \rightarrow S_1$  | 3.3706      | 367.84                      | 102 ->103                          | 0.69663                         | 0.1218 |
|                                 | $S_0 \rightarrow S_2$  | 3.9233      | 316.02                      | 99 ->103<br>100 ->103<br>101 ->103 | 0.14231<br>0.16043<br>0.66157   | 0.3557 |
|                                 | $S_0 \rightarrow S_3$  | 3.9650      | 312.69                      | 100 ->103<br>101 ->103             | 0.67958<br>-0.13450             | 0.0223 |
| DMSO                            | $S_0 \rightarrow S_1$  | 3.3773      | 367.11                      | 102 ->103                          | 0.69708                         | 0.1092 |
|                                 | $S_0 \rightarrow S_2$  | 3.9085      | 317.21                      | 100 ->103<br>101 ->103             | 0.45508<br>0.52444              | 0.2532 |
|                                 | $S_0 \rightarrow S_3$  | 3.9246      | 315.91                      | 99 ->103<br>100 ->103<br>101 ->103 | -0.13004<br>0.53220<br>-0.42768 | 0.1343 |
| MeOH                            | $S_0 \rightarrow S_1$  | 3.3794      | 366.89                      | 102 ->103                          | 0.69670                         | 0.1066 |
|                                 | $S_0 \rightarrow S_2$  | 3.9166      | 316.56                      | 100 ->103<br>101 ->103             | 0.49542<br>0.48747              | 0.2142 |
|                                 | $S_0 \rightarrow S_3$  | 3.9309      | 315.41                      | 99 ->103<br>100 ->103<br>101 ->103 | -0.14734<br>0.49462<br>-0.46412 | 0.1517 |

**Figure S80.** Calculated UV-Vis spectra for compound **6g** in DCM, DMSO and MeOH.

**CH<sub>2</sub>Cl<sub>2</sub>**

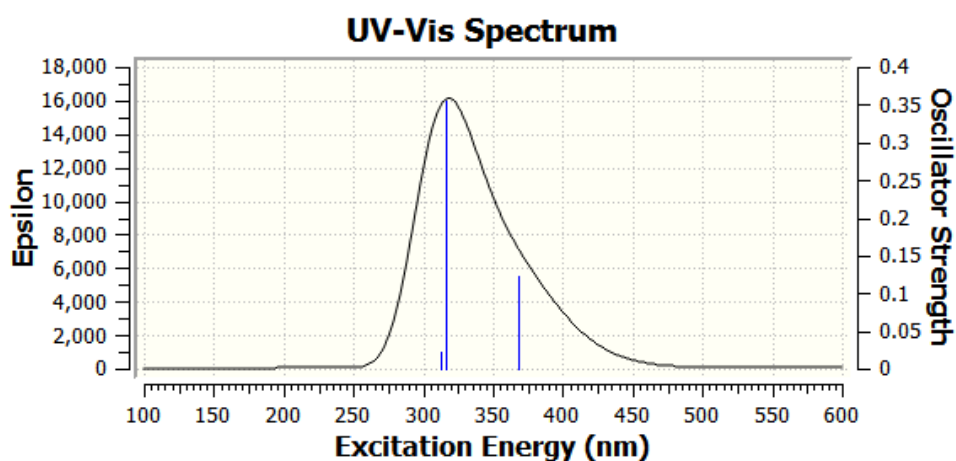

**DMSO**

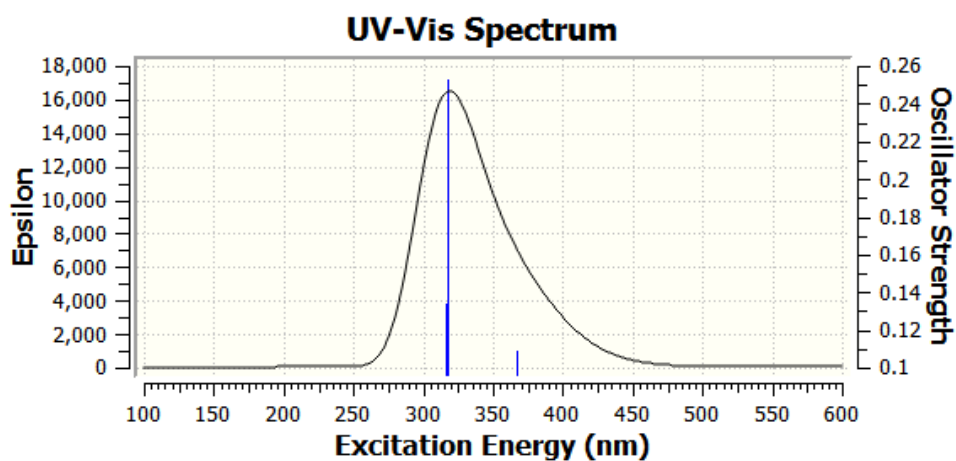

**MeOH**

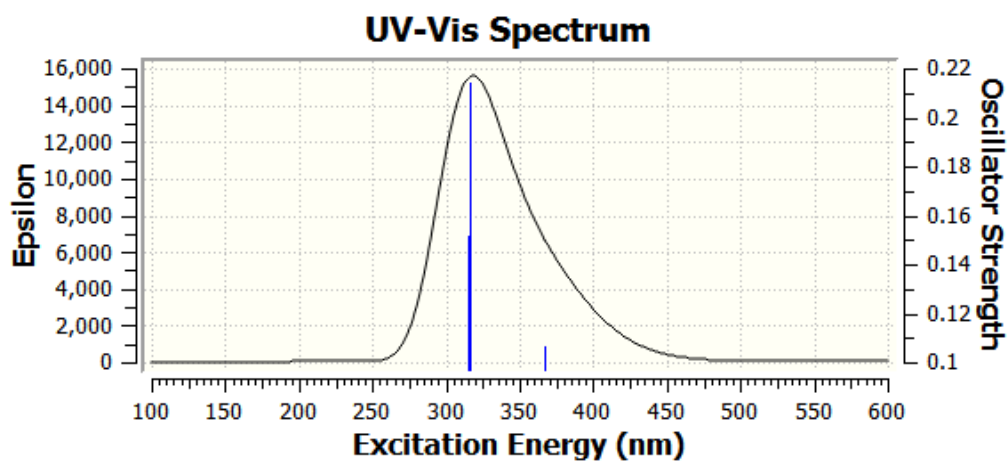

Figure S81.

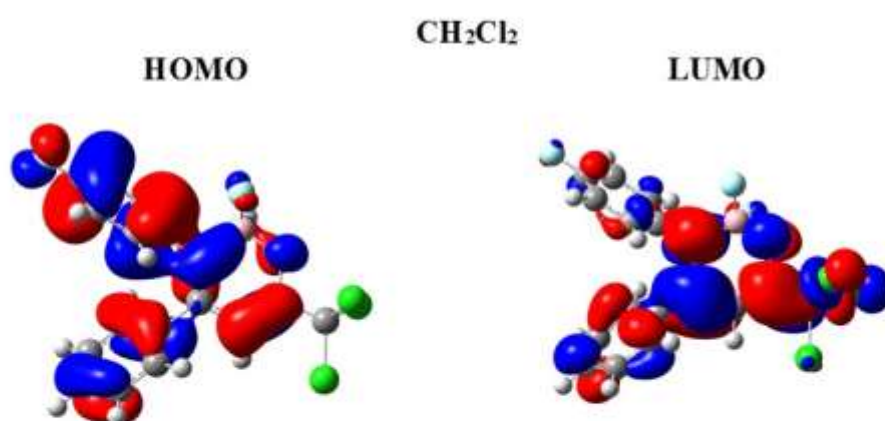

Figure S82.

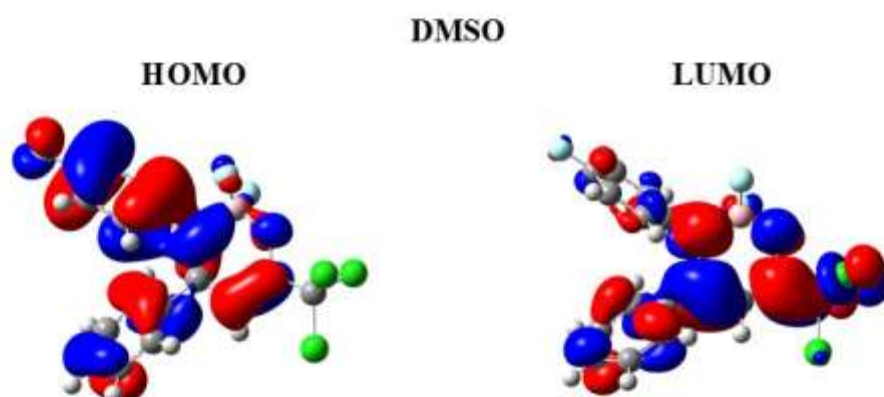

Figure S83.

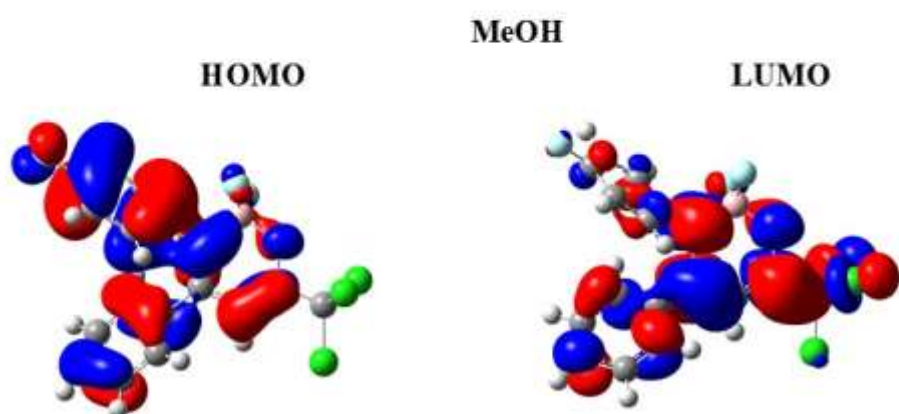

**Table S10.** Excitation energy (E), wavelength of maximum absorbance ( $\lambda_{\text{max}}$ ), and oscillator strengths ( $f$ ) for HOMO-LUMO orbitals in CH<sub>2</sub>Cl<sub>2</sub>, DMSO and MeOH for compound **6h**. Calculated at the TD-DFT (SCRF(PCM))-B3LYP/cc-pVTZ level.

| Solvente                        | Electronic Transitions | Energy (eV) | $\lambda_{\text{max}}$ (nm) | Main Orbital Transition             |                                | $F$    |
|---------------------------------|------------------------|-------------|-----------------------------|-------------------------------------|--------------------------------|--------|
| CH <sub>2</sub> Cl <sub>2</sub> | $S_0 \rightarrow S_1$  | 3.3140      | 374.12                      | 115 ->116                           | 0.69941                        | 0.1570 |
|                                 | $S_0 \rightarrow S_2$  | 3.8941      | 318.39                      | 112 ->116<br>114 ->116              | -0.17641<br>0.66920            | 0.3588 |
|                                 | $S_0 \rightarrow S_3$  | 3.9371      | 314.91                      | 113 ->116                           | 0.69238                        | 0.0165 |
| DMSO                            | $S_0 \rightarrow S_1$  | 3.3232      | 373.08                      | 115 ->116                           | 0.69933                        | 0.1443 |
|                                 | $S_0 \rightarrow S_2$  | 3.8804      | 319.51                      | 112 ->116<br>113 ->116<br>114 ->116 | -0.14436<br>0.24642<br>0.63880 | 0.3429 |
|                                 | $S_0 \rightarrow S_3$  | 3.8931      | 318.47                      | 113 ->116<br>114 ->116              | 0.65601<br>-0.22534            | 0.0414 |
| MeOH                            | $S_0 \rightarrow S_1$  | 3.3252      | 372.86                      | 115 ->116                           | 0.69914                        | 0.1406 |
|                                 | $S_0 \rightarrow S_2$  | 3.8892      | 318.79                      | 112 ->116<br>113 ->116<br>114 ->116 | -0.15527<br>0.26336<br>0.62962 | 0.3194 |
|                                 | $S_0 \rightarrow S_3$  | 3.8987      | 318.01                      | 112 ->116<br>113 ->116<br>114 ->116 | 0.10542<br>0.64922<br>-0.23948 | 0.0435 |



**Figure S84.** Calculated UV-Vis spectra for compound **6h** in DCM, DMSO and MeOH.

**CH<sub>2</sub>Cl<sub>2</sub>**

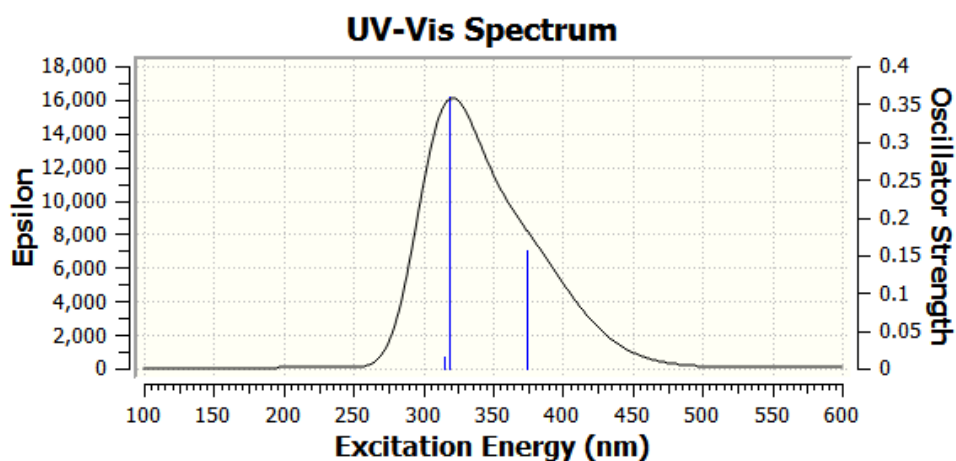

**DMSO**

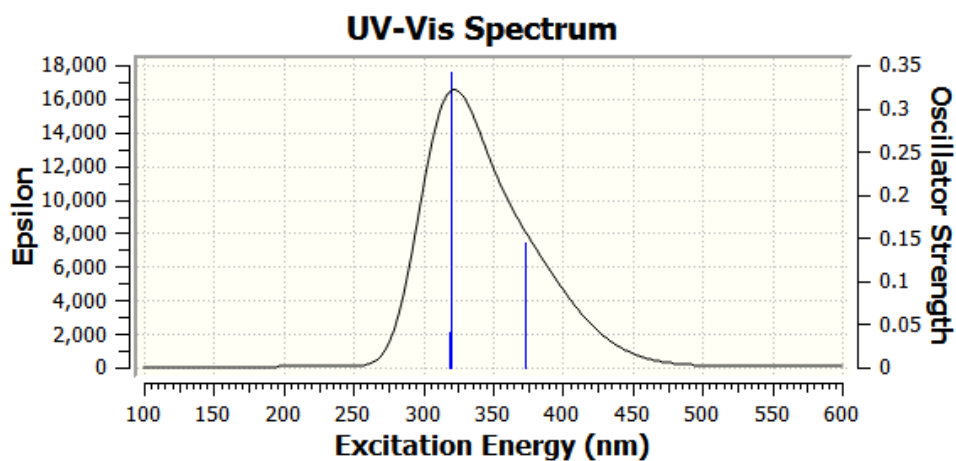

**MeOH**

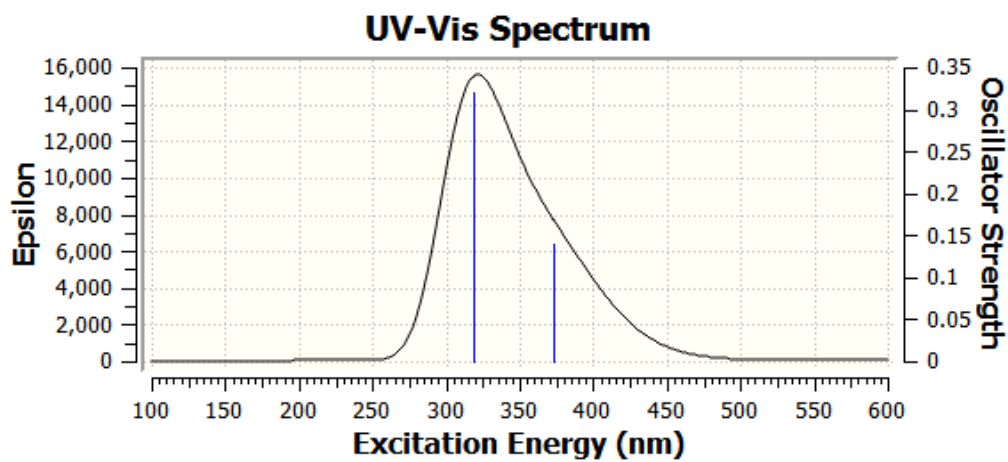

Figure S85.

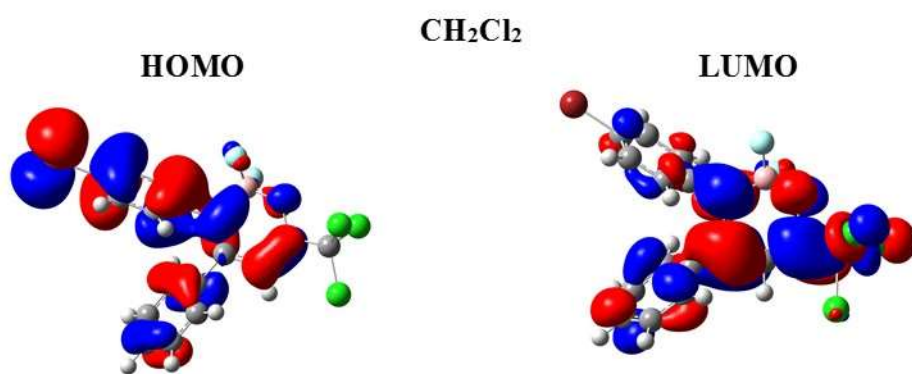

Figure S86.

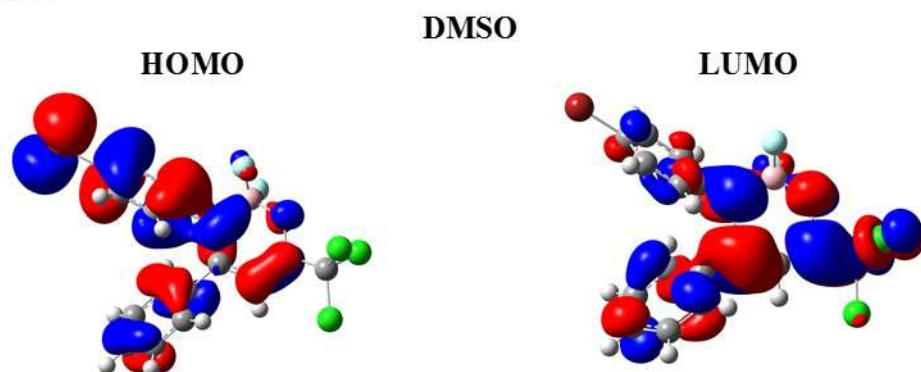

Figure S87.

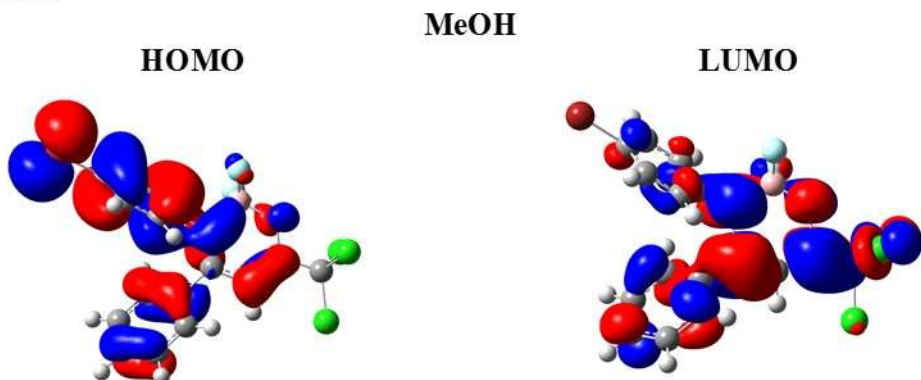

**Table S11.** Excitation energy (E), wavelength of maximum absorbance ( $\lambda_{\text{max}}$ ), and oscillator strengths ( $f$ ) for HOMO-LUMO orbitals in CH<sub>2</sub>Cl<sub>2</sub>, DMSO and MeOH for compound **6i**. Calculated at the TD-DFT (SCRF(PCM))-B3LYP/cc-pVTZ level.

| Solvente                        | Electronic Transitions | Energy (eV) | $\lambda_{\text{max}}$ (nm) | Main Orbital Transition                |                               | $F$    |
|---------------------------------|------------------------|-------------|-----------------------------|----------------------------------------|-------------------------------|--------|
| CH <sub>2</sub> Cl <sub>2</sub> | $S_0 \rightarrow S_1$  | 2.8648      | 432.79                      | 111 -> 112                             | 0.70382                       | 0.0626 |
|                                 | $S_0 \rightarrow S_2$  | 3.4160      | 362.95                      | 110 -> 112                             | 0.69952                       | 0.1202 |
|                                 | $S_0 \rightarrow S_3$  | 3.9523      | 313.70                      | 107 -> 112<br>108 -> 112<br>109 -> 112 | 0.16602<br>0.20495<br>0.64650 | 0.4126 |
| DMSO                            | $S_0 \rightarrow S_1$  | 2.8674      | 432.39                      | 111 -> 112                             | 0.70380                       | 0.0577 |
|                                 | $S_0 \rightarrow S_2$  | 3.4161      | 362.94                      | 110 -> 112                             | 0.69961                       | 0.1130 |
|                                 | $S_0 \rightarrow S_3$  | 3.9143      | 316.74                      | 108 -> 112<br>109 -> 112               | 0.67844<br>0.17100            | 0.0258 |
| MeOH                            | $S_0 \rightarrow S_1$  | 2.8681      | 432.28                      | 111 -> 112                             | 0.70379                       | 0.0556 |
|                                 | $S_0 \rightarrow S_2$  | 3.4183      | 362.71                      | 110 -> 112                             | 0.69954                       | 0.1097 |
|                                 | $S_0 \rightarrow S_3$  | 3.9204      | 316.26                      | 108 -> 112<br>109 -> 112               | 0.67860<br>0.16929            | 0.0246 |

**Figure S88.** Calculated UV-Vis spectra for compound **6i** in DCM, DMSO and MeOH.

**CH<sub>2</sub>Cl<sub>2</sub>**

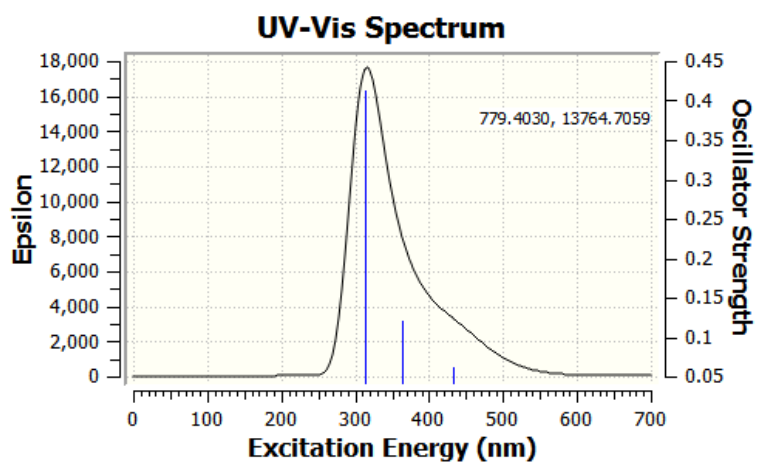

**DMSO**

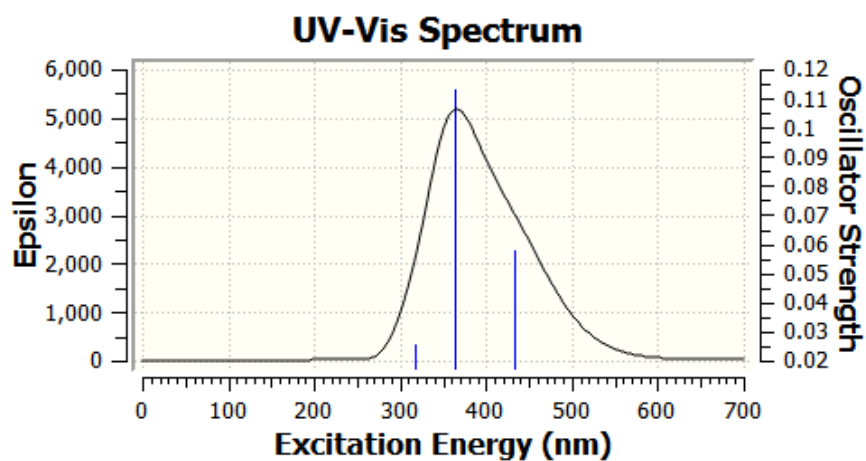

**MeOH**

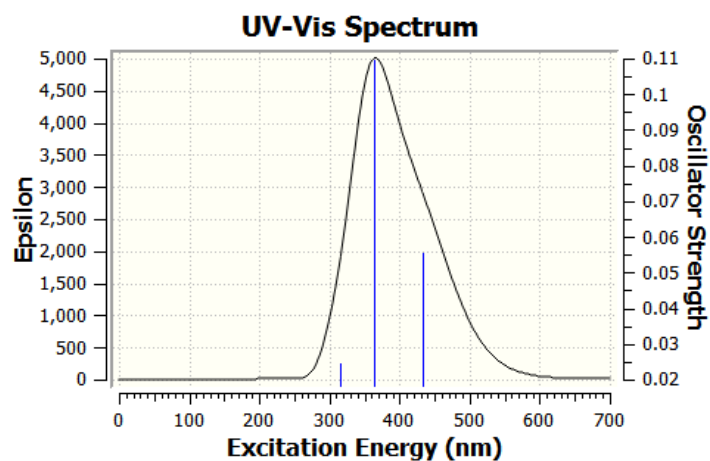

Figure S89

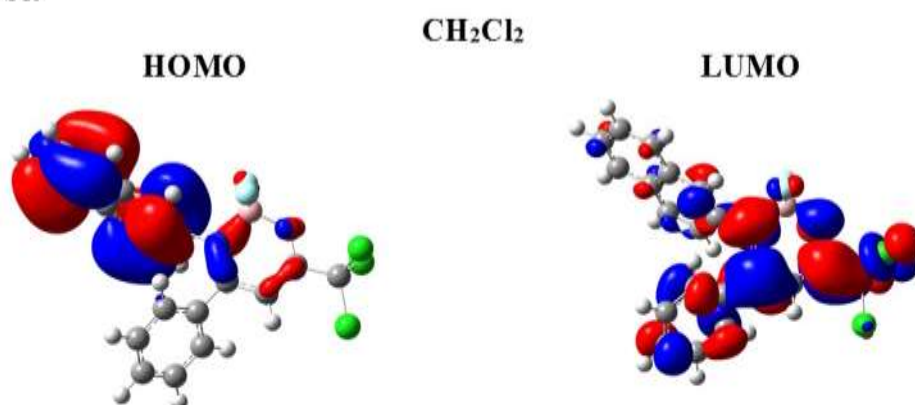

Figure S90.

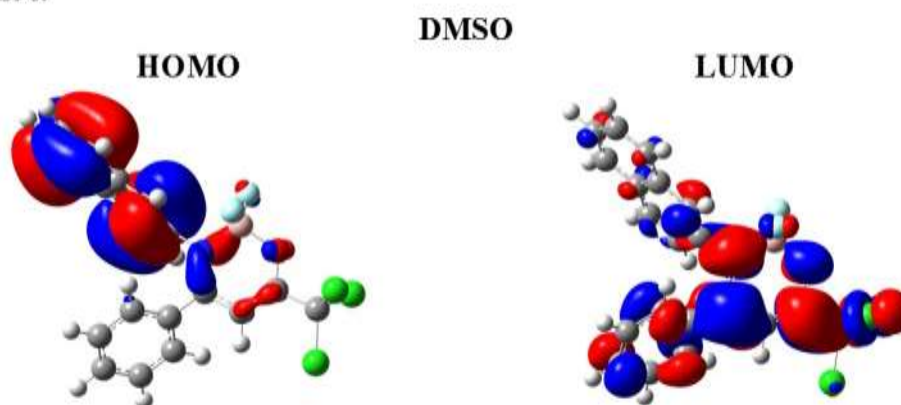

Figure S91.

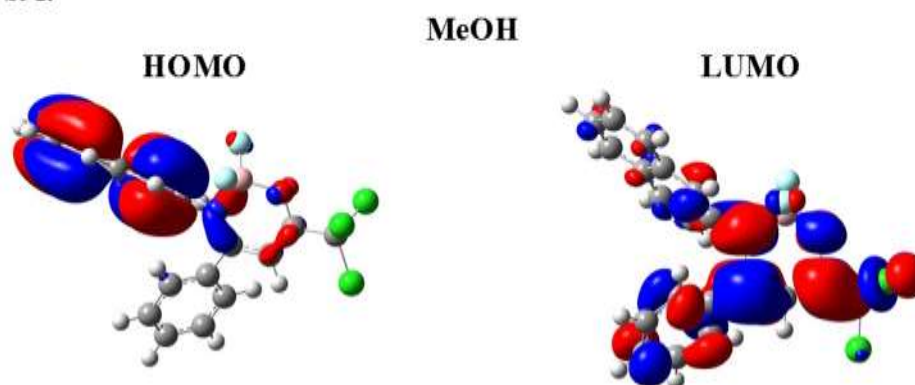

**Table S12.** Excitation energy (E), wavelength of maximum absorbance ( $\lambda_{\text{max}}$ ), and oscillator strengths ( $f$ ) for HOMO-LUMO orbitals in CH<sub>2</sub>Cl<sub>2</sub>, DMSO and MeOH for compound **7e**. Calculated at the TD-DFT (SCRF(PCM))-B3LYP/cc-pVTZ level.

| Solvente                        | Electronic Transitions | Energy (eV) | $\lambda_{\text{max}}$ (nm) | Main Orbital Transition  |                     | $F$    |
|---------------------------------|------------------------|-------------|-----------------------------|--------------------------|---------------------|--------|
| CH <sub>2</sub> Cl <sub>2</sub> | $S_0 \rightarrow S_1$  | 2.8972      | 427.95                      | 110 -> 111               | 0.70357             | 0.1386 |
|                                 | $S_0 \rightarrow S_2$  | 3.7197      | 333.32                      | 109 -> 111               | 0.69794             | 0.2851 |
|                                 | $S_0 \rightarrow S_3$  | 3.9445      | 314.32                      | 107 -> 111<br>108 -> 111 | 0.53902<br>-0.44496 | 0.0171 |
| DMSO                            | $S_0 \rightarrow S_1$  | 2.8937      | 428.46                      | 110 -> 111               | 0.70364             | 0.1270 |
|                                 | $S_0 \rightarrow S_2$  | 3.6931      | 335.72                      | 109 -> 111               | 0.69935             | 0.2910 |
|                                 | $S_0 \rightarrow S_3$  | 3.9084      | 317.23                      | 108 -> 111               | 0.69697             | 0.0083 |
| MeOH                            | $S_0 \rightarrow S_1$  | 2.8971      | 427.96                      | 110 -> 111               | 0.70355             | 0.1242 |
|                                 | $S_0 \rightarrow S_2$  | 3.7017      | 334.94                      | 109 -> 111               | 0.69816             | 0.2760 |
|                                 | $S_0 \rightarrow S_3$  | 3.9132      | 316.84                      | 108 -> 111               | 0.69811             | 0.0078 |

**Figure S92.** Calculated UV-Vis spectra for compound **7e** in DCM, DMSO and MeOH.

**CH<sub>2</sub>Cl<sub>2</sub>**

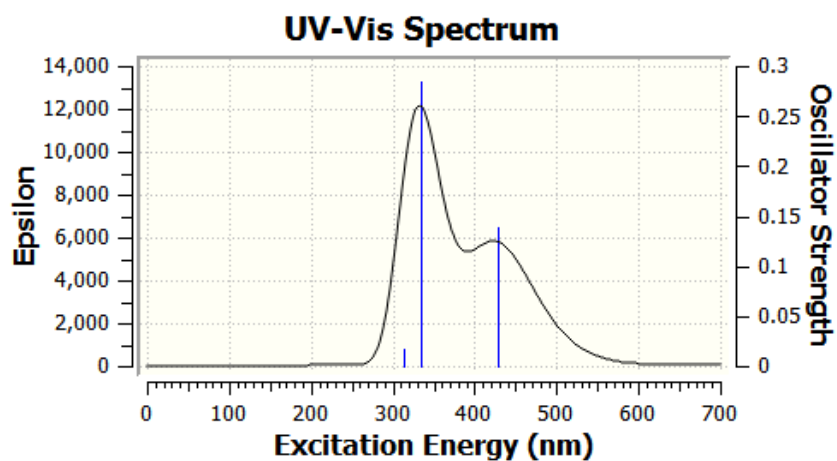

**DMSO**

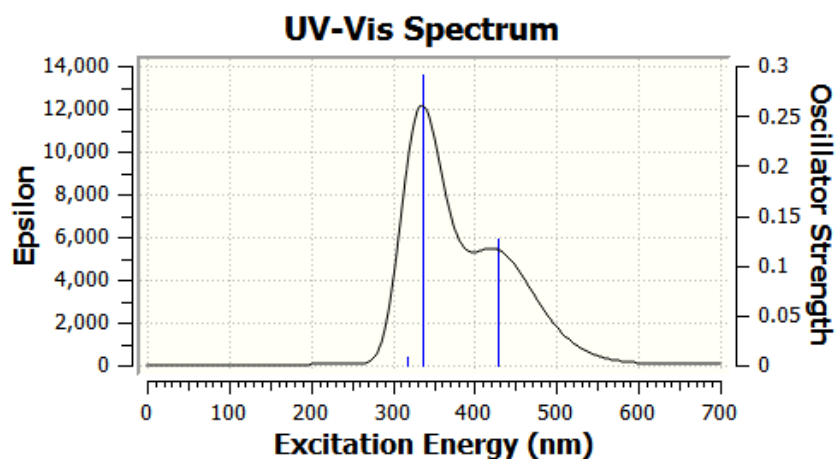

**MeOH**

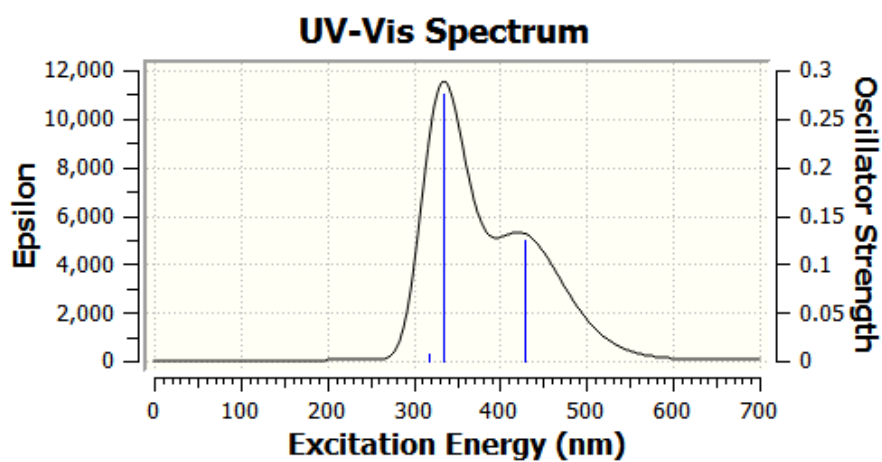

Figure S93.

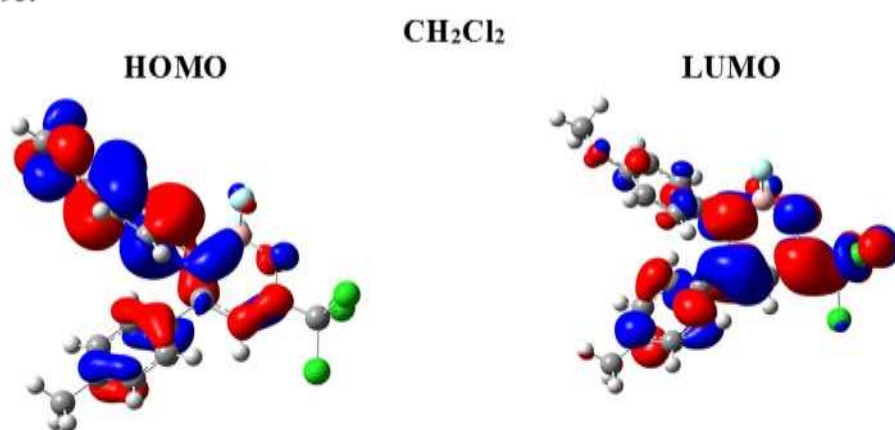

Figure S94

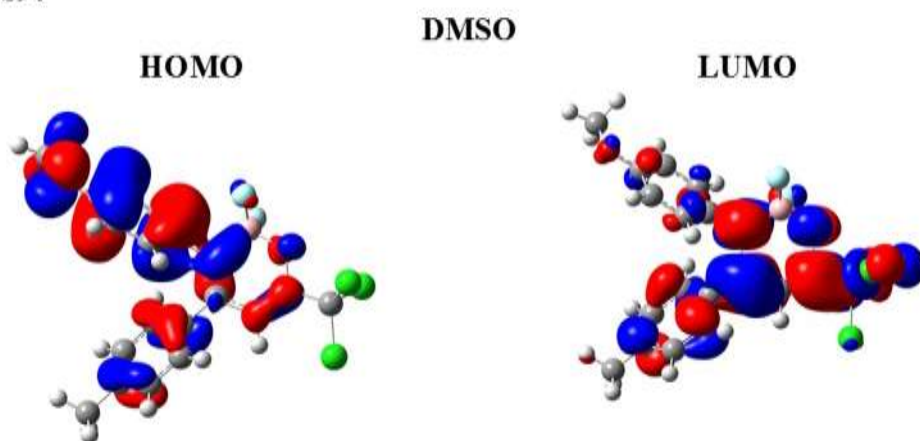

Figure S95.

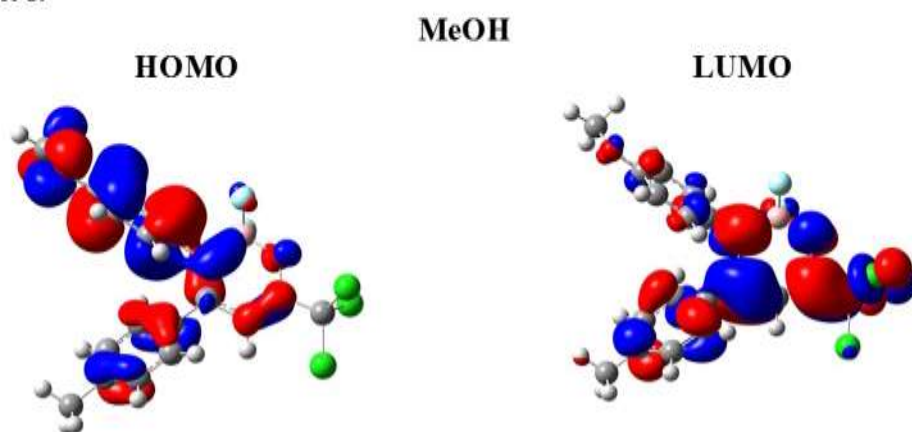



## 9. Antimicrobial assays

The *in vitro* antimicrobial activity of the  $\beta$ -enaminoketone and boron complex compounds was assessed against a panel of microorganisms including yeast-like fungi such as *Candida albicans* ATCC 44373, *Candida glabrata* ATCC 10231, *Candida tropicalis* ATCC 750, *Cryptococcus gatti* ATCC 28952 and *Saccharomyces cerevisiae* ATCC 2601. Filamentous fungi such as *Aspergillus flavus*, *Aspergillus fumigatus*, *Aspergillus niger*, *Aspergillus terreus*, as well as a clinical isolate of *Prototheca zopfii*, an alga of medicinal and veterinary importance, were also included. Among the bacteria, we included *Staphylococcus aureus* ATCC 25923, *Bacillus subtilis* ATCC 19659, *Klebsiella pneumoniae* clinical isolate, *Salmonella typhimurium* ATCC 14028, and *Pseudomonas aeruginosa* ATCC 9027.

The minimal inhibitory concentration (MIC) and the minimal fungicidal/bactericidal/algacidal concentrations were determined by broth microdilution methods according to CLSI standards.<sup>1,2,3</sup> Compounds were dissolved in DMSO and the work solutions were diluted in a culture medium. By further progressive dilutions with the test medium, the required concentrations (80, 40, 20, 10, 5, 2.5, 1.25, 0.62, 0.31 e 0.15  $\mu\text{g/mL}$ ) were obtained. The antimicrobial activities were evaluated based on the minimal inhibitory concentration (MIC) according to the CLSI M27-A3 procedures<sup>1</sup> for yeast-like fungi and the *P. zopfii*. The filamentous fungi were tested based on the CLSI M38-A2<sup>2</sup> procedures and for the bacteria, the procedures described in CLSI M7-A10,<sup>3</sup> were employed. Bacteria were initially inoculated into Mueller-Hinton agar and, after overnight growth, approximately five

---

<sup>1</sup> CLINICAL AND LABORATORY STANDARDS INSTITUTE (CLSI). **Document M07-A10. Reference Method for Dilution Antimicrobial Susceptibility Test of bacteria that grow aerobically; Approved Standard.** 10th ed. Clinical and Laboratory Standards Institute: Wayne, Pennsylvania, USA, 2015.

<sup>2</sup> CLINICAL AND LABORATORY STANDARDS INSTITUTE (CLSI). **Document M27-S4. Reference Method for Broth Dilution Antifungal Susceptibility Testing of yeasts; Approved Standard.** 4th ed. informational gsupplemetgl. Clinical and Laboratory Standards Institute: Wayne, Pennsylvania, USA, 2012.

<sup>3</sup> CLINICAL AND LABORATORY STANDARDS INSTITUTE (CLSI). **Document M38-A2. Reference Method for Broth Dilution Antifungal Susceptibility Testing of Filamentous Fungi; Approved Standard.** 2nd ed. Clinical and Laboratory Standards Institute: Wayne, Pennsylvania, USA, 2008.

colonies were directly suspended in saline solution until the turbidity matched the turbidity of the McFarland standard (approximately  $10^8$  cfu/mL). The suspensions were diluted to 1:100 in saline followed by a new dilution to 1:20 in Mueller-Hinton broth, resulting in a final inoculum concentration of  $5 \times 10^4$  cfu/mL per well. Yeasts and *P. zopfii* were inoculated on Sabouraud dextrose agar and the procedures of inoculum standardization were similar; the test medium was RPMI 1640 buffered with MOPS (3-(*N*-morpholino) propanesulfonic acid), pH 7.0. The filamentous fungi were initially inoculated on potato dextrose agar; after the time required for each species to induce conidium and sporangiospore formation, the inoculum standardization followed that described in the CLSI, M38-A2<sup>2</sup> protocol. Briefly, each well of the microdilution plate was filled with 100  $\mu$ L of compound diluted in 100  $\mu$ L of the inoculum. The plates were incubated at 35°C/24h for the bacteria strains and the yeast required 48h of incubation (except the *Cryptococcus* strains that were incubated for 72 h). For all tests growth and negative (inoculum-free) controls were performed. Growth or a lack of growth in the wells containing the antimicrobial agent was determined by comparison with the growth control, indicated by turbidity. The lowest concentration that completely inhibited visible growth of the organism was recorded as the MIC. All tests were carried out in duplicate and accepted if coincident. When the test not coincident they were repeated in duplicate, again.

The minimal fungicidal, bactericidal and algacidal concentrations were determined by subculture of 20  $\mu$ L of the content of each well that remained clear. The media employed were Sabouraud dextrose agar for fungi and *P. zopfii* and Mueller-Hinton agar for bacteria. The plates were incubated at 35 °C during the same time periods for MIC determination and the lowest concentration required to demonstrate complete growth absence was named “cidal”.

The interpretation of the results was based on fluconazole (yeasts) and amphotericin B (filamentous fungi and *P. zopfii*) breakpoints and based on imipenem for bacterial strains; all according to the CLSI M27-S4<sup>1</sup>, M38-A2<sup>2</sup> and M7-A10<sup>3</sup> techniques, respectively.

## 10. Cytotoxicity assays

The cytotoxic effects of  $\beta$ -enaminoketone boron complex compounds were measured by tetrazolium salt MTT assay<sup>4</sup> using mouse fibroblast 3T3 cell line as a model. 3T3 cells were grown in DMEM (Dulbecco's Modified Eagle's medium) supplemented with 10% FBS (Fetal Bovine Serum) and antibiotics in a 5% CO<sub>2</sub> atmosphere at 37 °C. 3T3 cells were detached by trypsinization and seeded in 96-wells plates at a density of  $1 \times 10^5$  cells/mL. After incubation for 24 h under 5% CO<sub>2</sub> at 37 °C to allow cells to attach to the plates, the spent medium was replaced with 200  $\mu$ L of fresh medium containing the compounds in concentrations ranging from 1 to 100  $\mu$ g/mL, besides a negative control were only the vehicle (DMSO) was added to the medium. After 24 h of incubation, the supernatant was removed, and 100  $\mu$ L of fresh medium containing MTT reagent (initially diluted in PBS at 5 mg/mL and then diluted 1:10 in medium without FBS) was then added to the cells. The plates were further incubated for 2 h, after which the medium was removed and 200  $\mu$ L of DMSO were then added to each well to dissolve the purple formazan product. After 10 min shaking at room temperature, the absorbance of the resulting solutions was measured at 590 nm using a microplate reader (Bio-Rad Laboratories, Hercules, CA). The effect of each treatment was calculated as a percentage of cell viability inhibition against the control.

---

<sup>4</sup> Mosmann T. *J. Immunol. Methods.* **1983**, 65, 55.

**Table S13.** In vitro antimicrobial and cytotoxic activities of  $\beta$ -enaminoketone **4a-i** and **5e** boron complex **6a-i** and **7e** against yeast, filamentous fungi, alga and bacteria (MIC/MFC/MBC,  $\mu\text{g/mL}$ ):

| Compounds | MIC <sup>a</sup> /MFC <sup>b</sup> |                    |                      |                 |                      | MIC <sup>a</sup> /MBC <sup>b</sup> |                     |                  |                   |                  | Cytotoxicity     |                    |                      |                       |                      |      |
|-----------|------------------------------------|--------------------|----------------------|-----------------|----------------------|------------------------------------|---------------------|------------------|-------------------|------------------|------------------|--------------------|----------------------|-----------------------|----------------------|------|
|           | Yeast                              |                    |                      |                 |                      | Filamentous fungi                  |                     | Alga             | Bacteria          |                  |                  |                    |                      |                       |                      |      |
|           | <i>C. albicans</i>                 | <i>C. glabrata</i> | <i>C. tropicalis</i> | <i>C. gatti</i> | <i>S. cerevisiae</i> | <i>A. niger</i>                    | <i>A. fumigatus</i> | <i>A. flavus</i> | <i>A. terreus</i> | Gram-positive    |                  | Gram-negative      |                      |                       |                      |      |
|           |                                    |                    |                      |                 |                      |                                    |                     |                  |                   | <i>P. zopfii</i> | <i>S. aureus</i> | <i>B. subtilis</i> | <i>K. pneumoniae</i> | <i>S. typhimurium</i> | <i>P. aeruginosa</i> |      |
| 4a        | -                                  | -                  | -                    | 20/40           | -                    | 10/20                              | -                   | -                | -                 | 0,62/0,62        | -                | -                  | -                    | -                     | -                    | >100 |
| 4b        | -                                  | -                  | -                    | 20/40           | -                    | 10/10                              | -                   | -                | -                 | 0,62/0,62        | -                | -                  | -                    | -                     | -                    | 25   |
| 4c        | -                                  | -                  | -                    | -               | -                    | 2,5/2,5                            | -                   | 40/40            | -                 | 1,25/5           | -                | -                  | -                    | -                     | -                    | 25   |
| 4d        | -                                  | -                  | -                    | -               | -                    | 2,5/40                             | -                   | 80/80            | -                 | 0,31/0,31        | -                | -                  | -                    | -                     | -                    | 5    |
| 4e        | -                                  | -                  | -                    | -               | -                    | 2,5/-                              | -                   | 80/80            | -                 | 0,31/0,31        | -                | -                  | -                    | -                     | -                    | 50   |
| 4f        | -                                  | -                  | -                    | -               | -                    | 10/10                              | -                   | -                | -                 | 2,5/2,5          | -                | -                  | -                    | -                     | -                    | 5    |
| 4g        | -                                  | -                  | -                    | -               | -                    | 2,5/2,5                            | 80/-                | 20/20            | 80/-              | -                | -                | -                  | -                    | -                     | -                    | 10   |
| 4h        | -                                  | -                  | -                    | -               | -                    | 2,5/2,5                            | -                   | -                | -                 | 1,25/1,25        | -                | -                  | -                    | -                     | -                    | 25   |
| 4i        | -                                  | -                  | -                    | -               | -                    | -                                  | -                   | -                | -                 | 10/10            | -                | -                  | -                    | -                     | -                    | 25   |
| 5e        | -                                  | -                  | -                    | 80/80           | -                    | -                                  | -                   | -                | -                 | 40/40            | -                | -                  | -                    | -                     | -                    | 1    |
| 6a        | -                                  | -                  | -                    | 40/80           | -                    | 40/40                              | -                   | -                | -                 | 5/5              | -                | -                  | -                    | -                     | -                    | 5    |
| 6b        | -                                  | -                  | -                    | 20/40           | -                    | 10/-                               | -                   | -                | -                 | 1,25/1,25        | -                | -                  | -                    | -                     | -                    | 5    |
| 6c        | 80/80                              | -                  | -                    | 20/40           | -                    | 10/10                              | 80/80               | 40/40            | 80/-              | 0,62/0,62        | 20/40            | 20/80              | 5/10                 | 20/80                 | -                    | 5    |
| 6d        | -                                  | -                  | -                    | 20/20           | -                    | 5/5                                | -                   | -                | -                 | 1,25/1,25        | -                | 80/-               | 80/-                 | 80/-                  | 80/-                 | 5    |
| 6e        | -                                  | -                  | -                    | 20/20           | -                    | 5/40                               | -                   | 40/40            | 80/80             | 0,31/0,31        | -                | -                  | -                    | -                     | -                    | 1    |
| 6f        | -                                  | -                  | -                    | 20/20           | -                    | 10/20                              | -                   | 40/40            | -                 | 0,31/0,31        | -                | -                  | -                    | -                     | -                    | 10   |
| 6g        | -                                  | -                  | -                    | 20/20           | -                    | 10/20                              | -                   | 40/40            | 80/-              | 1,25/1,25        | 20/80            | 20/80              | 10/40                | 40/80                 | -                    | 10   |
| 6h        | -                                  | -                  | -                    | 40/40           | -                    | 5/5                                | -                   | -                | -                 | 0,62/0,62        | -                | 80/-               | -                    | 80/-                  | 80/-                 | 5    |
| 6i        | 40/40                              | 80/80              | 40/40                | 20/80           | -                    | 5/40                               | -                   | 20/20            | 80/-              | 1,25/1,25        | 20/40            | 20/80              | 5/20                 | 20/80                 | -                    | 5    |
| 7e        | -                                  | -                  | -                    | -               | -                    | -                                  | -                   | -                | -                 | 40/40            | -                | -                  | -                    | -                     | -                    | 1    |
| FLZ       | 4,0                                | 8,0                | 4,0                  | 2,0             | 1,0                  |                                    |                     |                  |                   |                  |                  |                    |                      |                       |                      |      |
| AmB       |                                    |                    |                      |                 |                      | 1,0                                | 1,0                 | 1,0              | 2,0               | 0,5              |                  |                    |                      |                       |                      |      |
| IMP       |                                    |                    |                      |                 |                      |                                    |                     |                  |                   |                  | 0,06             | 2,0                | <4,0                 | ≤1,0                  | 2,0                  |      |

CIM/CFM, Minimal inhibitory concentration/Minimal fungicidal concentration; CIM/CBM, Minimal inhibitory concentration/Minimal bactericidal concentration; *C. albicans*, *Candida albicans* ATCC 44373; *C. glabrata*, *Candida glabrata* ATCC 10231; *C. tropicalis*, *Candida tropicalis* ATCC 750; *C. gatti*, *Cryptococcus gatti* ATCC 28952; *C. cerevisiae*, *Saccharomyces cerevisiae* ATCC 2601; *A. niger*, *Aspergillus niger* (clinical isolate); *A. fumigatus*, *Aspergillus fumigatus* (clinical isolate); *A. flavus*, *Aspergillus flavus* (clinical isolate); *A. terreus*, *Aspergillus terreus* (clinical isolate); *Prototheca zopfii* (clinical isolate); *S. aureus*, *Staphylococcus aureus* ATCC 25923; *B. subtilis*, *Bacillus subtilis* ATCC19659; *K. pneumoniae*, *Klebsiella pneumoniae* (clinical isolate); *S. typhimurium*, *Salmonella typhimurium* ATCC 14028; *P. aeruginosa*, *Pseudomonas aeruginosa* ATCC 9027; FLZ, Fluconazole; AmB, Anfotericin B; IMP, Imipenem; -, No activity.
